# Supplementary material for: Direct Synthesis of Bicyclic Acetals via Visible Light Catalysis
Source: PubMed Central journal article supplement — iScience. 2020 Jul 24;23(8):101395. doi: 10.1016/j.isci.2020.101395 (PMC7404572; doi:10.1016/j.isci.2020.101395), 2020-07-24
Supplement: mmc1.pdf [file mmc1.pdf]

**iScience, Volume 23**

## **Supplemental Information**

### **Direct Synthesis of Bicyclic Acetals**

#### **via Visible Light Catalysis**

**Fengjin Wu, Leifeng Wang, Ying Ji, Ge Zou, Hong Shen, David A. Nicewicz, Jean Chen, and Yong Huang**

## Supporting Information

### I. Transparent Methods

#### General Information

All solvents were distilled according to general practice prior to use. Solvents for flash column chromatography were technical grade and distilled prior to use.  $^1\text{H}$  NMR and  $^{13}\text{C}$  NMR data were recorded on Bruker 400 MHz (100 MHz for  $^{13}\text{C}$ ) nuclear resonance spectrometers unless otherwise specified.  $^1\text{H}$  and  $^{13}\text{C}$  NMR chemical shifts are given in ppm relative to  $\text{SiMe}_4$ , with the solvent resonance used as internal reference. Chemical shifts ( $\delta$ ) are given in parts per million and referenced to the residual solvent signal; and all coupling constants are reported in Hz. The following abbreviations were used to explain the multiplicities: s (singlet), d (doublet), t (triplet), q (quartet), m (multiplet). Thin-layer chromatography (TLC) was conducted with 0.25 mm Yantai silica gel plates (60F-254) and visualized by exposure to UV light (254 nm) or stained with phosphomolybdic acid in EtOH. Flash column chromatography was performed using Tsingdao silica gel (60, particle size 0.040–0.063 mm). HRMS (ESI) analysis was performed by The Analytical Instrumentation Center at Peking University; Shenzhen Graduate School and (HRMS) data were reported with ion mass/charge ( $m/z$ ) ratios as values in atomic mass units.

## Preparation of acridinium photocatalysts

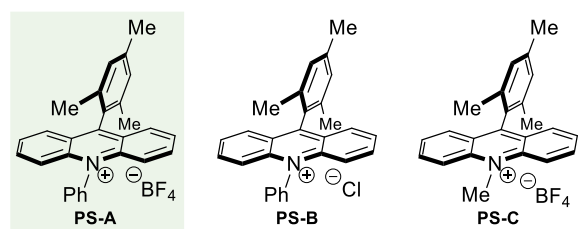

Photocatalysts (PS-A, PS-B, PS-C) used in this study were synthesized by the method of Fukuzumi et al. (Fukuzumi et al., 2004). Tetrafluoroboric acid (diethyl ether complex) was used for hydrolysis in PS-A and PS-C synthesis. HCl (4.0 M in 1, 4-dioxane) was used for hydrolysis in PS-B synthesis. Spectral data for these compounds matches the reported value in the literature.

### **9-mesityl-10-phenylacridin-10-ium tetrafluoroborate (PS-A):**

Yellow solid.  $^1\text{H}$  NMR (500 MHz, Chloroform- $d$ )  $\delta$  8.14 (s, 2H), 7.89 (dq,  $J$  = 14.2, 7.4, 6.8 Hz, 5H), 7.79 (t,  $J$  = 7.7 Hz, 2H), 7.75 – 7.69 (m, 2H), 7.60 (d,  $J$  = 9.1 Hz, 2H), 7.18 (s, 2H), 2.49 (s, 3H), 1.83 (s, 6H).

### **9-mesityl-10-phenylacridin-10-ium chloride (PS-B):**

Yellow solid.  $^1\text{H}$  NMR (300 MHz, Chloroform- $d$ )  $\delta$  8.23 (ddd,  $J$  = 8.9, 6.2, 1.8 Hz, 2H), 7.97 – 7.81 (m, 7H), 7.72 (d,  $J$  = 7.6 Hz, 2H), 7.59 (d,  $J$  = 9.0 Hz, 2H), 7.14 (s, 2H), 2.44 (s, 3H), 1.78 (s, 6H).

### **9-mesityl-10-methylacridin-10-ium tetrafluoroborate (PS-C):**

Yellow solid.  $^1\text{H}$  NMR (300 MHz, Chloroform- $d$ )  $\delta$  8.81 (d,  $J$  = 9.3 Hz, 2H), 8.41 (ddd,  $J$  = 9.3, 6.5, 1.8 Hz, 2H), 8.05 – 7.59 (m, 4H), 7.15 (s, 2H), 5.11 (s, 3H), 2.48 (s, 3H), 1.73 (s, 6H).

## General procedure for acetals

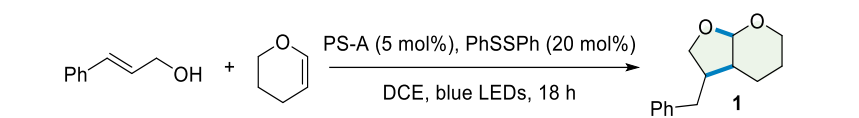

PhSSPh (0.04 mmol, 8.7 mg), Mes-Acr-PhBF<sub>4</sub> (PS-A) (0.02 mmol, 4.6 mg) and (E)-3-phenylprop-2-en-1-ol (0.2 mmol, 26.8 mg) were weighed in an oven-dried 8 mL vial equipped with a magnetic stirring bar. The reaction vial was capped with a rubber septum and anhydrous DCE (3 mL) was added under an argon atmosphere. Then 3, 4-dihydro-2H-pyran (0.8 mmol, 73  $\mu$ L) was added and the reaction vessel was fixed on a blue LED light reaction equipment (1 W, 452 nm). After TLC indicated a full conversion (usually 18 hours), the reaction was purified by flash silica gel column chromatography directly.

## General procedure for substrates

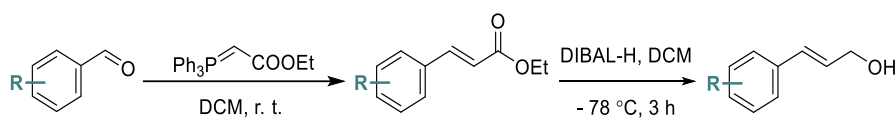

### Step 1:

To a stirred solution of aldehyde (10.3 mmol) in DCM (20 mL) at room temperature was added ethyl (triphenylphosphoranylidene)acetate (1.1 eq, 11.3 mmol). The reaction solution was stirred for 15 hours and then concentrated under vacuum condition. The residue was purified by flash silica gel column chromatography directly.

### Step 2:

To a solution of corresponding ester (8.84 mmol) in DCM (70 mL) at -78 °C was added a 1.0 M solution of DIBAL-H (in hexane, 2.5 eq, 22 mmol) dropwise. After 3 hours, the reaction mixture was warmed to room temperature and quenched with 1N HCl (40 mL). The aqueous phase was separated and extracted with DCM. The combined organic extracts were washed with NaHCO<sub>3</sub>, dried over Na<sub>2</sub>SO<sub>4</sub>. Then the solution was filtered and concentrated under vacuum condition. The residue was further purified by flash silica gel column chromatography.

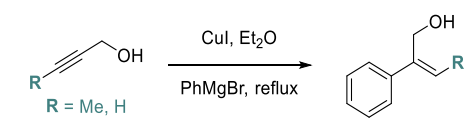

To a solution of PhMgBr (25 mmol) in 30 ml of Et<sub>2</sub>O was added CuI (0.29 g, 1.5 mmol). The mixture was stirred at room temperature for 0.5 hours. Then a solution of corresponding propargyl alcohol (10 mmol) in 10 mL Et<sub>2</sub>O was added slowly. After the addition was completed, the reaction mixture was refluxed for 24 hours. After cooling to room temperature, an aqueous solution of NH<sub>4</sub>Cl was added slowly. The organic layer was separated and aqueous layer was extracted with Et<sub>2</sub>O. The combined organic extracts were dried over Na<sub>2</sub>SO<sub>4</sub>. Then the solution was filtered and concentrated under vacuum condition. The residue was purified by flash silica gel column chromatography (Duan et al., 2009).

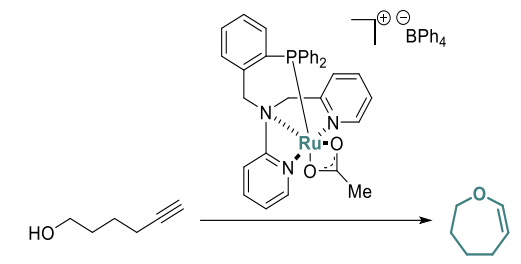

Catalyst  $[\text{Ru}(\text{N}_3\text{P})(\text{OAc})][\text{BPh}_4]$  (0.005 mmol) was added to a solution of alkynol (17.6 mmol) in THF (15 mL). The resulting solution was stirred at 80 °C and monitored by TLC. When the maximum conversion was reached, the desired product was isolated by flash column chromatography on silica gel (Liu et al., 2010).

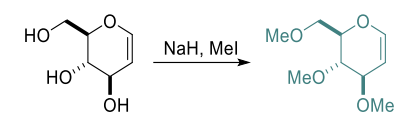

D-Galactal (730 mg, 5 mmol), which had been pre-dried under vacuum in a flame-dried flask for 1 h, was dissolved in anhydrous DMF (30 mL) under a  $\text{N}_2$  atmosphere. The reaction mixture was cooled to 0 °C, after which NaH (60% wt in mineral oil, 900 mg, 22.5 mmol) was added portionwise. When addition was completed the reaction was allowed to warm to room temperature. After being stirred at room temperature for 30 min, the solution was cooled to 0 °C and iodomethane (140  $\mu\text{L}$ , 22.5 mmol) was added dropwise. The reaction mixture was then allowed to warm to room temperature and stirred for another 3 hours, and quenched with MeOH (0.5 mL). The solution was diluted with EtOAc (40 mL) and washed with water (3x 20 mL) and brine (20 mL), dried over  $\text{Na}_2\text{SO}_4$  and concentrated in vacuum. Purification by column chromatography afforded target product as a pale yellow liquid (752 mg, 80%). Proton and carbon NMR were consistent with literature data (Balmond et al., 2014).

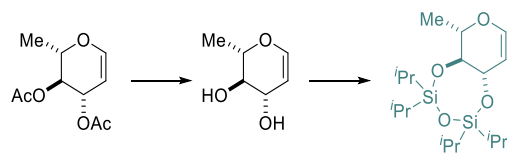

3, 4-O-Di-acetyl-L-rhamnol (520 mg, 2.43 mmol) was dissolved in a solution of MeOH (8 mL),  $\text{H}_2\text{O}$  (1 mL) and  $\text{Et}_3\text{N}$  (1 mL), and stirred for 18 hours. Then the solvent was removed to afford L-rhamnol as a solid. L-Rhamnol and imidazole (332 mg, 4.88 mmol) were dissolved in distilled pyridine (20 mL) under  $\text{N}_2$  atmosphere and the solution was cooled to 0 °C. 1,3-Dichloro-

1,1,3,3-tetraisopropylidisiloxane (1.2 mL, 3.75 mmol) was added dropwise and the solution was then allowed to warm to room temperature and stirred for 18 h. The reaction was quenched with H<sub>2</sub>O (30 mL), extracted with EtOAc (50 mL). The organic layer was washed with brine (20 mL), dried over MgSO<sub>4</sub>, filtered and concentrated in vacuum. Following purification by column chromatography afforded the desired product as a white solid (846 mg, 96%).

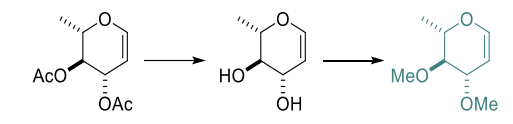

3, 4-O-Di-acetyl-L-rhamnal (1.0 g, 4.67 mmol) was dissolved in a solution of MeOH (15 mL), H<sub>2</sub>O (2 mL) and Et<sub>3</sub>N (2 mL) and stirred for 18 hours. Then the solvents were removed and the residue was dissolved in EA, washed with H<sub>2</sub>O and brine, and dried over Na<sub>2</sub>SO<sub>4</sub>. Following purification by column chromatography, L-rhamnal was obtained as a white solid (546 mg, 90% yield). L-rhamnal (546 mg, 4.2 mmol) was dissolved in anhydrous DMF (25 mL) under N<sub>2</sub> atmosphere. The reaction mixture was cooled to 0 °C, after which NaH (60%wt in mineral oil, 504 mg, 12.6 mmol) was added portionwise. When addition was completed the reaction was allowed to warm to room temperature. After being stirred at room temperature for 30 min, the solution was cooled to 0 °C and iodomethane (78 μL, 12.6 mmol) was added dropwise. The reaction mixture was then allowed to warm to room temperature and stirred for another 3 hours, and quenched with MeOH (0.5 mL). The solution was diluted with EtOAc (40 mL) and washed with water (3 x 20 mL) and brine (20 mL), dried over Na<sub>2</sub>SO<sub>4</sub> and concentrated in vacuum. Purification by column chromatography afforded the target product as a pale yellow liquid (498 mg, 75%). Proton and carbon NMR were consistent with literature data.

## II. Date S1: $^1\text{H}$ NMR and $^{13}\text{C}$ NMR spectra data of products (Related to Figure 3-5)

### 3-benzylhexahydro-4H-furo[2,3-b]pyran (1)

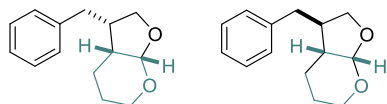

Eluent for purification: hexane: ethyl acetate = 10:1.

Colorless oil (35.3 mg, 81% yield, dr = 1.8:1). Proton and carbon NMR were consistent with literature data. **Cis-syn:**  $^1\text{H}$  NMR (500 MHz, Chloroform-*d*)  $\delta$  7.32 – 7.26 (m, 2H), 7.24 – 7.19 (m, 1H), 7.19 – 7.14 (m, 2H), 5.29 (d,  $J$  = 3.7 Hz, 1H), 3.92 – 3.85 (m, 1H), 3.82 – 3.74 (m, 2H), 3.65 (t,  $J$  = 8.1 Hz, 1H), 2.79 – 2.55 (m, 3H), 1.96 (m, 1H), 1.79 – 1.73 (m, 1H), 1.86 – 1.53 (m, 3H). **Cis-anti:**  $^1\text{H}$  NMR (500 MHz, Chloroform-*d*)  $\delta$  7.32–7.26 (m, 2H), 7.24–7.19 (m, 1H), 7.19–7.14 (m, 2H), 5.04 (d,  $J$  = 3.6 Hz, 1H), 4.18 (t,  $J$  = 8.2 Hz, 1H), 3.92 – 3.85 (m, 1H), 3.65 (t,  $J$  = 8.1 Hz, 1H), 3.43 (td,  $J$  = 11.3, 2.4 Hz, 1H), 2.87 (dd,  $J$  = 13.3, 5.2 Hz, 1H), 2.79–2.55 (m, 2H), 1.86–1.53 (m, 4H), 1.38–1.32 (m, 1H).  $^{13}\text{C}$  NMR (**trans & cis mixture**) (101 MHz, Chloroform-*d*)  $\delta$  140.12, 140.08, 128.51, 128.49, 128.36, 126.22, 126.18, 102.13, 101.96, 73.64, 69.87, 64.37, 60.98, 43.84, 42.52, 39.42, 38.73, 36.58, 33.38, 23.17, 22.45, 20.74, 19.57. **HRMS** calculated for  $\text{C}_{14}\text{H}_{18}\text{O}_2$  ( $\text{M} + \text{Na}^+$ ): 241.1149, found: 241.1202.

### 3-(4-fluorobenzyl)hexahydro-4H-furo[2,3-b]pyran (2)

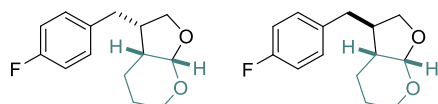

Eluent for purification: hexane: ethyl acetate = 10:1.

Colorless oil (30.7 mg, 65% yield, dr = 1.3:1). Proton and carbon NMR were consistent with literature data (Yan et al., 2012). **Cis-syn:**  $^1\text{H}$  NMR (400 MHz, Chloroform-*d*)  $\delta$  7.11 (m, 2H), 7.00 – 6.93 (m, 2H), 5.27 (d,  $J$  = 3.7 Hz, 1H), 3.90 – 3.83 (m, 1H), 3.81 – 3.71 (m, 2H), 3.67 – 3.58 (m, 1H), 2.77 – 2.47 (m, 3H), 2.00 – 1.90 (m, 1H), 1.78 – 1.71 (m, 1H), 1.88 – 1.44 (m, 3H). **Cis-anti:**  $^1\text{H}$  NMR (400 MHz, Chloroform-*d*)  $\delta$  7.11 (m, 2H), 7.00 – 6.93 (m, 2H), 5.02 (d,  $J$  = 3.4 Hz, 1H), 4.15 (t,  $J$  = 8.2 Hz, 1H), 3.90 – 3.83 (m, 1H), 3.67 – 3.58 (m, 1H), 3.46 – 3.37 (m, 1H), 2.82 (dd,  $J$  = 12.8, 4.6 Hz, 1H), 2.77 – 2.47 (m, 2H), 1.88 – 1.44 (m, 4H), 1.34 (m,  $J$  = 10.1, 5.4, 3.0 Hz, 1H).  $^{13}\text{C}$  NMR (**trans & cis mixture**) (101 MHz, Chloroform-*d*)  $\delta$  162.66 (d,  $J$  = 245.3 Hz), 162.60 (d,  $J$  = 245.0 Hz), 135.72, 135.69,



129.88 (d,  $J = 8.0$  Hz), 129.72 (d,  $J = 7.07$  Hz), 115.41 (d,  $J = 21.2$  Hz), 115.39 (d,  $J = 21.4$  Hz), 102.11, 101.93, 73.52, 69.76, 64.38, 60.99, 43.79, 42.60, 39.53, 37.89, 36.52, 32.62, 23.11, 22.45, 20.69, 19.54. **HRMS** calculated for  $C_{14}H_{17}FO_2$  ( $M + Na^+$ ): 259.1105, found: 259.1105.

### 3-(4-phenoxybenzyl)hexahydro-4H-furo[2,3-b]pyran (3)

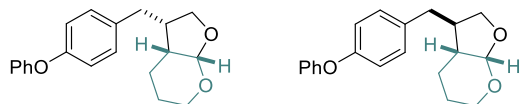

Eluent for purification: hexane: ethyl acetate =

10:1. White solid (36.0 mg, 58% yield, dr = 1.4:1). **Cis-syn:**  $^1H$  NMR (400 MHz, Chloroform- $d$ )  $\delta$  7.37 – 7.29 (m, 2H), 7.16 – 7.05 (m, 3H), 7.07 – 6.98 (m, 2H), 6.98 – 6.88 (m, 2H), 5.30 (d,  $J = 3.7$  Hz, 1H), 3.90 (t,  $J = 7.7$  Hz, 1H), 3.85 – 3.74 (m, 2H), 3.72 – 3.58 (m, 1H), 2.80 – 2.51 (m, 3H), 1.98 (ddt,  $J = 12.1, 10.2, 5.0$  Hz, 1H), 1.82 – 1.71 (m, 1H), 1.60 – 1.46 (m, 3H). **Cis-trans:**  $^1H$  NMR (400 MHz, Chloroform- $d$ )  $\delta$  7.36 – 7.30 (m, 2H), 7.15 – 7.06 (m, 3H), 7.03 – 6.97 (m, 2H), 6.97 – 6.91 (m, 2H), 5.05 (d,  $J = 3.5$  Hz, 1H), 4.20 (t,  $J = 8.2$  Hz, 1H), 3.89 (ddt,  $J = 11.7, 4.3, 2.4$  Hz, 1H), 3.65 (dd,  $J = 8.4, 7.5$  Hz, 1H), 3.49 – 3.38 (m, 1H), 2.84 (dd,  $J = 13.0, 4.7$  Hz, 1H), 2.69 – 2.50 (m, 2H), 1.91 – 1.76 (m, 2H), 1.76 – 1.62 (m, 3H), 1.41 – 1.29 (m, 1H). **Cis-syn:**  $^{13}C$  NMR (101 MHz, Chloroform- $d$ )  $\delta$  157.35, 155.59, 134.97, 129.69, 129.54, 123.12, 119.00, 118.70, 101.97, 69.86, 60.99, 42.65, 36.58, 32.67, 23.16, 19.57. **Cis-anti:**  $^{13}C$  NMR (101 MHz, Chloroform- $d$ )  $\delta$  157.41, 155.52, 135.01, 129.72, 129.69, 123.07, 119.07, 118.60, 102.13, 73.61, 64.38, 43.78, 39.55, 37.95, 22.48, 20.75. **HRMS** calculated for  $C_{20}H_{22}O_3$  ( $M + Na^+$ ): 333.1461, found: 333.1459.

### 3-(3-fluoro-4-methoxybenzyl)hexahydro-4H-furo[2,3-b]pyran (4)

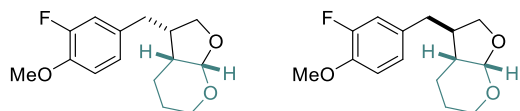

Eluent for purification: hexane: ethyl acetate =

10:1. Colorless oil (36.7 mg, 69% yield, dr = 1.1:1). Isolated as an inseparable mixture of diastereomers. Spectral data for two diastereomers is given herein. **Cis-syn:**  $^1H$  NMR (400 MHz, Chloroform- $d$ )  $\delta$  6.90 – 6.86 (m, 1H), 6.87 – 6.84 (m, 2H), 5.27 (d,  $J = 3.7$  Hz, 1H), 3.86 (s, 4H), 3.75 (ddd,  $J = 12.8, 10.2, 7.9$  Hz, 2H), 3.67 – 3.55 (m, 1H), 2.70 – 2.45 (m, 3H), 1.94 (dtd,  $J = 10.3, 6.3, 3.9$  Hz, 1H), 1.85 – 1.70 (m, 2H), 1.67 – 1.51 (m, 3H). **Cis-trans:**  $^1H$  NMR (400 MHz, Chloroform- $d$ )  $\delta$  6.87 – 6.82 (m, 3H), 5.02 (d,  $J = 3.3$  Hz, 1H), 4.16 (t,  $J = 8.2$  Hz, 1H), 3.86 (s, 4H), 3.67 – 3.55 (m, 1H), 3.46 – 3.37 (m, 1H), 2.77 (dd,  $J = 13.3, 5.1$  Hz, 1H), 2.70

– 2.45 (m, 2H), 1.85 – 1.70 (m, 2H), 1.67 – 1.51 (m, 2H), 1.33 (dq,  $J = 13.1, 2.9, 2.5$  Hz, 1H).

**$^{13}\text{C}$  NMR (trans & cis mixture)** (101 MHz, Chloroform- $d$ )  $\delta$  153.49 (d,  $J = 246.3$  Hz), 153.47 (d,  $J = 246.9$  Hz), 145.98 (d,  $J = 5.7$  Hz), 145.93 (d,  $J = 5.7$  Hz), 133.16, 133.11, 123.99 (d,  $J = 19.6$  Hz), 123.96 (d,  $J = 12.6$  Hz), 116.22 (d,  $J = 32.4$  Hz), 116.08 (d,  $J = 3.5$  Hz), 113.51 (d,  $J = 2.0$  Hz), 113.49 (d,  $J = 2.0$  Hz), 102.09, 101.92, 73.48, 69.73, 64.36, 60.99, 56.31, 56.30, 43.75, 42.45, 39.44, 37.77, 36.51, 32.47, 23.10, 22.46, 20.71, 19.53. **HRMS** calculated for  $\text{C}_{15}\text{H}_{19}\text{FO}_3$  ( $M + \text{Na}^+$ ): 289.1210, found: 289.1203.

### 3-(naphthalen-2-ylmethyl)hexahydro-4H-furo[2,3-b]pyran (5)

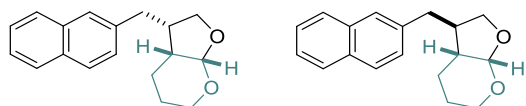

Eluent for purification: hexane: ethyl acetate =

10:1. Colorless oil (26.8 mg, 50% yield, dr = 1.1:1). **Cis-syn:**  $^1\text{H}$  NMR (400 MHz, Chloroform- $d$ )  $\delta$  7.80 (m, 3H), 7.62 (d,  $J = 1.7$  Hz, 1H), 7.53 – 7.43 (m, 2H), 7.32 (dd,  $J = 8.4, 1.8$  Hz, 1H), 5.31 (d,  $J = 3.7$  Hz, 1H), 3.96 – 3.87 (m, 1H), 3.88 – 3.75 (m, 2H), 3.66 (dtd,  $J = 11.3, 3.3, 1.7$  Hz, 1H), 2.91 (dd,  $J = 10.8, 5.7$  Hz, 1H), 2.87 – 2.75 (m, 2H), 2.05 – 1.95 (m, 1H), 1.82 (dq,  $J = 9.7, 2.2$  Hz, 1H), 1.68 – 1.58 (m, 3H). **Cis-trans:**  $^1\text{H}$  NMR (400 MHz, Chloroform- $d$ )  $\delta$  7.88 – 7.73 (m, 3H), 7.61 (d,  $J = 1.7$  Hz, 1H), 7.52 – 7.38 (m, 2H), 7.31 (dd,  $J = 8.5, 1.8$  Hz, 1H), 5.07 (d,  $J = 3.7$  Hz, 1H), 4.21 (t,  $J = 8.0$  Hz, 1H), 3.89 (dq,  $J = 11.7, 2.6$  Hz, 1H), 3.70 (dd,  $J = 8.4, 7.3$  Hz, 1H), 3.44 (ddd,  $J = 11.6, 10.6, 2.3$  Hz, 1H), 3.15 – 2.96 (m, 1H), 2.85 – 2.66 (m, 2H), 1.93 (dq,  $J = 9.0, 4.8, 4.0$  Hz, 1H), 1.85 – 1.64 (m, 3H), 1.42 – 1.29 (m, 1H). **Cis-syn:**  $^{13}\text{C}$  NMR (101 MHz, Chloroform- $d$ )  $\delta$  137.60, 133.55, 132.10, 128.18, 127.62, 127.40, 126.94, 126.56, 126.10, 125.40, 101.99, 69.93, 61.02, 42.35, 36.65, 33.60, 23.17, 19.61. **Cis-trans:**  $^{13}\text{C}$  NMR (101 MHz, Chloroform- $d$ )  $\delta$  137.61, 133.53, 132.12, 128.13, 127.62, 127.44, 127.08, 126.69, 126.09, 125.40, 102.15, 73.68, 64.37, 43.93, 39.34, 38.97, 22.55, 20.78. **HRMS** calculated for  $\text{C}_{18}\text{H}_{20}\text{O}_2$  ( $M + \text{Na}^+$ ): 291.1356, found: 291.1356.

### 3-((9H-fluoren-2-yl)methyl)hexahydro-4H-furo[2,3-b]pyran (6)

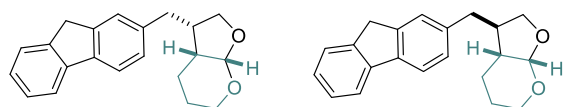

Eluent for purification: hexane: ethyl acetate =

10:1. White solid (34.9 mg, 57% yield, dr = 1.4:1). **Cis-syn:**  $^1\text{H}$  NMR (400 MHz, Chloroform-

*d*)  $\delta$  7.76 (d,  $J$  = 7.6 Hz, 1H), 7.70 (d,  $J$  = 7.7 Hz, 1H), 7.54 (dt,  $J$  = 7.4, 1.0 Hz, 1H), 7.41 – 7.34 (m, 2H), 7.33 – 7.27 (m, 1H), 7.18 (dd,  $J$  = 7.7, 1.5 Hz, 1H), 5.31 (d,  $J$  = 3.7 Hz, 1H), 3.90 (d,  $J$  = 14.7 Hz, 3H), 3.86 – 3.75 (m, 2H), 3.66 (ddq,  $J$  = 11.0, 3.1, 1.7 Hz, 1H), 2.92 – 2.58 (m, 3H), 2.00 (dt,  $J$  = 10.8, 2.9 Hz, 1H), 1.80 (dt,  $J$  = 9.4, 2.6 Hz, 1H), 1.66 – 1.58 (m, 3H). **Cis-trans:**  $^1\text{H NMR}$  (400 MHz, Chloroform-*d*)  $\delta$  7.77 (dt,  $J$  = 7.5, 0.9 Hz, 1H), 7.70 (d,  $J$  = 7.8 Hz, 1H), 7.54 (dq,  $J$  = 7.4, 1.0 Hz, 1H), 7.42 – 7.35 (m, 2H), 7.34 – 7.27 (m, 2H), 7.24 – 7.06 (m, 1H), 5.06 (d,  $J$  = 3.6 Hz, 1H), 4.22 (t,  $J$  = 8.1 Hz, 1H), 3.95 – 3.81 (m, 3H), 3.74 – 3.63 (m, 1H), 3.44 (ddd,  $J$  = 11.6, 10.7, 2.3 Hz, 1H), 2.96 – 2.84 (m, 1H), 2.77 – 2.58 (m, 2H), 1.98 – 1.85 (m, 1H), 1.83 – 1.65 (m, 3H), 1.43 – 1.30 (m, 1H). **Cis-syn:**  $^{13}\text{C NMR}$  (101 MHz, Chloroform-*d*)  $\delta$  143.69, 143.07, 141.49, 139.94, 138.79, 126.98, 126.73, 126.47, 125.02, 124.98, 119.83, 119.65, 101.99, 69.94, 61.00, 42.73, 36.82, 36.64, 33.55, 23.19, 19.61. **Cis-trans:**  $^{13}\text{C NMR}$  (101 MHz, Chloroform-*d*)  $\delta$  143.66, 143.10, 141.52, 139.95, 138.79, 127.14, 126.73, 126.47, 125.18, 125.00, 119.82, 119.67, 102.19, 73.71, 64.39, 43.89, 39.68, 38.92, 36.82, 22.52, 20.77. **HRMS** calculated for  $\text{C}_{21}\text{H}_{22}\text{O}_2$  ( $\text{M} + \text{Na}^+$ ): 329.1512, found: 329.1512.

### 3-(1-phenylethyl)hexahydro-4H-furo[2,3-*b*]pyran (7)

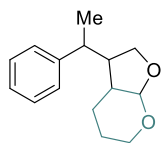

Eluent for purification: hexane: ethyl acetate = 10:1. Colorless oil (35.8 mg, 77% yield, dr = 2.4:1:1). Isolated as an inseparable mixture of diastereomers. Spectral data for the major diastereomer is given herein.  $^1\text{H NMR}$  (400 MHz, Chloroform-*d*)  $\delta$  7.32 – 7.26 (m, 2H), 7.23 – 7.12 (m, 3H), 5.00 (d,  $J$  = 3.4 Hz, 1H), 4.01 (t,  $J$  = 8.6 Hz, 1H), 3.89 (dtd,  $J$  = 11.7, 3.9, 1.4 Hz, 1H), 3.54 (dd,  $J$  = 8.8, 6.7 Hz, 1H), 3.44 (ddd,  $J$  = 11.5, 10.4, 2.6 Hz, 1H), 2.75 (dq,  $J$  = 8.7, 6.9 Hz, 1H), 2.50 (qd,  $J$  = 8.1, 6.2 Hz, 1H), 1.97 – 1.37 (m, 4H), 1.25 (m, 1H), 1.31 (d,  $J$  = 7.0 Hz, 3H).  $^{13}\text{C NMR}$  (three isomers) (101 MHz, Chloroform-*d*)  $\delta$  145.69, 145.25, 145.03, 128.56, 128.52, 128.44, 127.49, 127.12, 126.84, 126.50, 126.47, 126.37, 102.65, 102.38, 101.94, 72.69, 71.81, 68.92, 64.39, 64.14, 60.74, 48.01, 44.60, 44.42, 44.17, 43.30, 43.16, 42.25, 38.14, 35.77, 25.45, 24.06, 23.30, 22.57, 21.46, 21.08, 20.73, 20.56, 18.89. **HRMS** calculated for  $\text{C}_{15}\text{H}_{20}\text{O}_2$  ( $\text{M} + \text{Na}^+$ ): 255.1356, found: 255.1354.

### 3-benzyl-2-methylhexahydro-4H-furo[2,3-b]pyran (8)

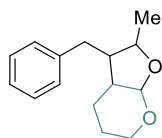

Eluent for purification: hexane: ethyl acetate = 10:1. Colorless oil (21.3 mg, 46% yield, dr = 2.5:2.5:1.8:1). Isolated as an inseparable mixture of diastereomers. Spectral data for the major diastereomer is given herein. **<sup>1</sup>H NMR** (500 MHz, Chloroform-*d*)  $\delta$  7.30 (s, 2H), 7.21 (d,  $J$  = 3.0 Hz, 3H), 5.04 (d,  $J$  = 3.6 Hz, 1H), 4.57 (p,  $J$  = 6.7 Hz, 1H), 3.89 – 3.87 (m, 1H), 3.40 (dt,  $J$  = 11.3, 2.2 Hz, 1H), 2.89 – 2.82 (m, 1H), 2.70 (dd,  $J$  = 7.7, 3.2 Hz, 1H), 2.60 (dd,  $J$  = 13.6, 8.0 Hz, 1H), 1.94 (dd,  $J$  = 6.5, 3.1 Hz, 1H), 1.74 (s, 1H), 1.56 (dt,  $J$  = 10.7, 3.7 Hz, 3H), 1.10 (d,  $J$  = 6.1 Hz, 3H). **<sup>13</sup>C NMR (four isomers)** (126 MHz, Chloroform-*d*)  $\delta$  140.53, 140.37, 139.79, 128.94, 128.51, 128.47, 128.40, 126.27, 126.19, 126.08, 126.05, 101.56, 100.82, 100.51, 100.18, 82.11, 73.86, 64.44, 64.19, 61.06, 60.92, 50.43, 46.33, 45.08, 43.36, 42.58, 38.03, 37.59, 37.04, 34.62, 31.31, 30.98, 25.39, 23.56, 23.31, 22.63, 22.44, 22.19, 21.40, 20.82, 20.79, 20.72, 19.84, 18.85, 17.38. **HRMS** calculated for C<sub>15</sub>H<sub>20</sub>O<sub>2</sub> (M + Na<sup>+</sup>): 255.1356, found: 255.1355.

### 3-(benzofuran-5-ylmethyl)hexahydro-4H-furo[2,3-b]pyran (9)

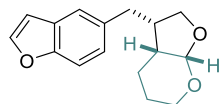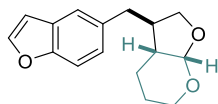

Eluent for purification: hexane: ethyl acetate = 10:1. Colorless oil (35.6 mg, 69% yield, dr = 1.4:1). **Cis-syn:** **<sup>1</sup>H NMR** (400 MHz, Chloroform-*d*)  $\delta$  7.61 (d,  $J$  = 2.2 Hz, 1H), 7.49 – 7.33 (m, 2H), 7.10 (dd,  $J$  = 8.4, 1.8 Hz, 1H), 6.72 (dd,  $J$  = 2.2, 1.0 Hz, 1H), 5.29 (d,  $J$  = 3.7 Hz, 1H), 3.89 (t,  $J$  = 7.8 Hz, 1H), 3.79 (ddd,  $J$  = 10.1, 8.6, 5.3 Hz, 2H), 3.66 (ddq,  $J$  = 11.1, 3.1, 1.8 Hz, 1H), 2.83 (dd,  $J$  = 10.6, 6.0 Hz, 1H), 2.78 – 2.67 (m, 2H), 2.03 – 1.90 (m, 1H), 1.80 (ddd,  $J$  = 9.9, 6.6, 4.4 Hz, 1H), 1.63 – 1.53 (m, 3H). **Cis-trans:** **<sup>1</sup>H NMR** (400 MHz, Chloroform-*d*)  $\delta$  7.61 (d,  $J$  = 2.2 Hz, 1H), 7.45 – 7.34 (m, 2H), 7.09 (dd,  $J$  = 8.4, 1.8 Hz, 1H), 6.72 (dd,  $J$  = 2.2, 1.0 Hz, 1H), 5.05 (d,  $J$  = 3.6 Hz, 1H), 4.25 – 4.11 (m, 1H), 3.92 – 3.82 (m, 1H), 3.74 – 3.62 (m, 1H), 3.43 (ddd,  $J$  = 11.6, 10.7, 2.3 Hz, 1H), 3.07 – 2.88 (m, 1H), 2.74 – 2.59 (m, 2H), 1.88 (ddt,  $J$  = 8.9, 5.9, 2.9 Hz, 1H), 1.84 – 1.64 (m, 3H), 1.34 (m, 1H). **Cis-syn:** **<sup>13</sup>C NMR** (101 MHz, Chloroform-*d*)  $\delta$  153.67, 145.28, 134.55, 127.64, 124.72, 120.45, 111.25, 106.33, 101.99, 69.91, 60.99, 43.01, 36.60, 33.27, 23.17, 19.58. **Cis-anti:** **<sup>13</sup>C NMR**

(101 MHz, Chloroform-*d*)  $\delta$  153.71, 145.26, 134.53, 127.62, 124.89, 120.63, 111.22, 106.36, 102.16, 73.65, 64.36, 43.80, 39.93, 38.64, 22.52, 20.77. **HRMS** calculated for C<sub>16</sub>H<sub>18</sub>O<sub>3</sub> (M + Na<sup>+</sup>): 281.1148, found: 281.1148.

### 3-(benzo[*b*]thiophen-2-ylmethyl)hexahydro-4H-furo[2,3-*b*]pyran (10)

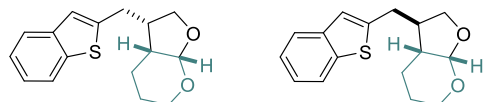

Eluent for purification: hexane: ethyl acetate = 10:1.

Colorless oil (41.6 mg, 76% yield, dr = 1.4:1). **Cis-syn:** <sup>1</sup>H NMR (400 MHz, Chloroform-*d*)  $\delta$  7.82 – 7.71 (m, 1H), 7.68 (dd, *J* = 7.4, 1.3 Hz, 1H), 7.35 – 7.25 (m, 2H), 7.08 – 6.97 (m, 1H), 5.31 (d, *J* = 3.7 Hz, 1H), 4.03 (t, *J* = 8.1 Hz, 1H), 3.80 (ddd, *J* = 13.1, 6.7, 3.0 Hz, 2H), 3.72 – 3.60 (m, 1H), 3.05 (ddd, *J* = 14.9, 7.9, 1.0 Hz, 1H), 2.94 (ddd, *J* = 14.9, 7.6, 1.1 Hz, 1H), 2.87 – 2.73 (m, 1H), 2.09 (dq, *J* = 9.3, 2.7 Hz, 1H), 1.81 (ddd, *J* = 11.2, 6.4, 3.3 Hz, 1H), 1.63 – 1.56 (m, 3H). **Cis-trans:** <sup>1</sup>H NMR (400 MHz, Chloroform-*d*)  $\delta$  7.77 (dd, *J* = 7.9, 1.2 Hz, 1H), 7.73 – 7.67 (m, 1H), 7.36 – 7.27 (m, 2H), 7.02 (d, *J* = 1.0 Hz, 1H), 5.07 (d, *J* = 3.6 Hz, 1H), 4.33 (t, *J* = 8.4 Hz, 1H), 3.95 – 3.85 (m, 1H), 3.72 (dd, *J* = 8.6, 7.4 Hz, 1H), 3.49 – 3.37 (m, 1H), 3.13 (ddd, *J* = 14.9, 5.5, 1.1 Hz, 1H), 2.89 (ddd, *J* = 14.9, 9.0, 1.0 Hz, 1H), 2.81 – 2.67 (m, 1H), 1.92 (dq, *J* = 9.1, 2.9 Hz, 1H), 1.89 – 1.65 (m, 3H), 1.42 – 1.31 (m, 1H). **Cis-syn:** <sup>13</sup>C NMR (101 MHz, Chloroform-*d*)  $\delta$  143.76, 139.93, 139.27, 124.26, 123.75, 122.84, 122.13, 121.19, 101.92, 69.77, 61.11, 42.36, 36.62, 28.80, 23.06, 19.52. **Cis-trans:** <sup>13</sup>C NMR (101 MHz, Chloroform-*d*)  $\delta$  143.78, 139.94, 139.42, 124.25, 123.76, 122.88, 122.14, 121.39, 102.03, 73.48, 64.32, 43.93, 39.62, 33.94, 22.62, 20.77. **HRMS** calculated for C<sub>16</sub>H<sub>18</sub>O<sub>2</sub>S (M + Na<sup>+</sup>): 297.0920, found: 297.0920.

### 3-((hexahydro-4H-furo[2,3-*b*]pyran-3-yl)methyl)dibenzo[*b*,*d*]furan (11)

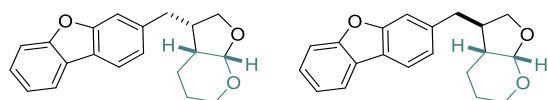

Eluent for purification: hexane: ethyl acetate =

10:1. White solid (46.2 mg, 75% yield, dr = 1.4:1). Isolated as an inseparable mixture of diastereomers. Spectral data for the two diastereomers is given herein. **Cis-syn:** <sup>1</sup>H NMR (400 MHz, Chloroform-*d*)  $\delta$  7.94 (dd, *J* = 7.7, 1.5 Hz, 1H), 7.73 (t, *J* = 2.1 Hz, 1H), 7.56 (d, *J* = 8.2 Hz, 1H), 7.50 – 7.41 (m, 2H), 7.34 (t, *J* = 7.5 Hz, 1H), 7.27 – 7.21 (m, 1H), 5.31 (d, *J* = 3.7 Hz,

1H), 3.93 – 3.84 (m, 1H), 3.84 – 3.77 (m, 2H), 3.73 – 3.63 (m, 1H), 2.94 – 2.85 (m, 1H), 2.82 – 2.66 (m, 2H), 1.99 (q,  $J = 4.8$  Hz, 1H), 1.81 – 1.58 (m, 4H). **Cis-trans:  $^1\text{H NMR}$**  (400 MHz, Chloroform- $d$ )  $\delta$  7.94 (dd,  $J = 7.7, 1.5$  Hz, 1H), 7.73 (t,  $J = 2.1$  Hz, 1H), 7.56 (d,  $J = 8.2$  Hz, 1H), 7.50 – 7.41 (m, 2H), 7.34 (t,  $J = 7.5$  Hz, 1H), 7.27 – 7.21 (m, 1H), 5.06 (d,  $J = 3.7$  Hz, 1H), 4.21 (t,  $J = 8.0$  Hz, 1H), 3.93 – 3.84 (m, 1H), 3.73 – 3.63 (m, 1H), 3.43 (td,  $J = 11.3, 2.4$  Hz, 1H), 3.07 – 2.95 (m, 1H), 2.82 – 2.66 (m, 2H), 1.96 – 1.87 (m, 1H), 1.81 – 1.58 (m, 3H), 1.33 (m, 1H).  **$^{13}\text{C NMR}$  (trans & cis mixture)** (101 MHz, Chloroform- $d$ )  $\delta$  156.51, 154.91, 154.86, 134.61, 127.64, 127.46, 127.17, 124.42, 124.40, 124.06, 122.66, 120.58, 120.56, 120.17, 120.06, 111.70, 111.54, 111.52, 102.19, 102.00, 73.64, 69.90, 64.37, 61.03, 43.87, 43.00, 39.95, 38.68, 36.66, 33.36, 23.18, 22.55, 20.78, 19.64. **HRMS** calculated for  $\text{C}_{20}\text{H}_{20}\text{O}_3$  ( $\text{M} + \text{Na}^+$ ): 331.1305, found: 331.1302.

### 3-(thiophen-3-ylmethyl)hexahydro-4H-furo[2,3-b]pyran (12)

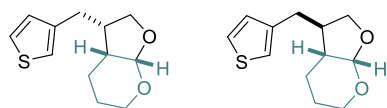

Eluent for purification: hexane: ethyl acetate = 10:1.

Colorless oil (30.0 mg, 67% yield, dr = 1.3:1). **Cis-syn:  $^1\text{H NMR}$**  (400 MHz, Chloroform- $d$ )  $\delta$  7.28 – 7.25 (m, 1H), 6.97 – 6.86 (m, 2H), 5.29 (d,  $J = 3.7$  Hz, 1H), 3.94 (t,  $J = 7.8$  Hz, 1H), 3.77 (ddd,  $J = 12.8, 10.3, 7.7$  Hz, 2H), 3.65 (dtd,  $J = 11.4, 3.3, 1.6$  Hz, 1H), 2.83 – 2.57 (m, 3H), 1.99 (ddt,  $J = 12.1, 10.2, 4.9$  Hz, 1H), 1.74 (m, 1H), 1.62 – 1.45 (m, 3H). **Cis-trans:  $^1\text{H NMR}$**  (400 MHz, Chloroform- $d$ )  $\delta$  7.27 (d,  $J = 3.9$  Hz, 1H), 6.96 – 6.88 (m, 2H), 5.03 (d,  $J = 3.3$  Hz, 1H), 4.25 (t,  $J = 8.1$  Hz, 1H), 3.89 (ddt,  $J = 11.7, 4.2, 2.5$  Hz, 1H), 3.67 – 3.59 (m, 1H), 3.48 – 3.32 (m, 1H), 2.94 – 2.81 (m, 1H), 2.71 – 2.56 (m, 2H), 1.83 (m, 1H), 1.80 – 1.62 (m, 3H), 1.41 – 1.29 (m, 1H). **Cis-syn:  $^{13}\text{C NMR}$**  (101 MHz, Chloroform- $d$ )  $\delta$  140.36, 127.90, 125.71, 120.59, 101.97, 69.98, 61.05, 41.85, 36.63, 27.98, 23.13, 19.47. **Cis-anti:  $^{13}\text{C NMR}$**  (101 MHz, Chloroform- $d$ )  $\delta$  140.42, 128.03, 125.76, 120.75, 102.11, 73.75, 64.38, 43.89, 38.84, 33.14, 22.45, 20.75. **HRMS** calculated for  $\text{C}_{12}\text{H}_{16}\text{O}_2\text{S}$  ( $\text{M} + \text{Na}^+$ ): 247.0763, found: 247.0763.

### 3-(4-methoxybenzyl)hexahydrofuro[2,3-b]furan (13)

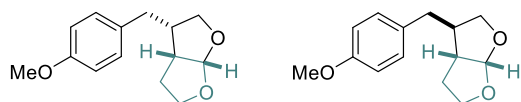

Eluent for purification: hexane: ethyl acetate =

10:1. Colorless oil (28.1 mg, 60% yield, dr = 1.9:1). Isolated as an inseparable mixture of diastereomers. Spectral data for the two diastereomer is given herein. **Cis-syn:**  $^1\text{H NMR}$  (400 MHz, Chloroform-*d*)  $\delta$  7.11 – 7.05 (m, 2H), 6.83 (dd,  $J$  = 8.6, 2.0 Hz, 2H), 5.71 (d,  $J$  = 4.9 Hz, 1H), 3.97 – 3.92 (m, 1H), 3.88 – 3.83 (m, 2H), 3.79 (s, 3H), 3.54 (dd,  $J$  = 10.2, 8.4 Hz, 1H), 2.77 (tt,  $J$  = 10.9, 5.2 Hz, 1H), 2.68 (dd,  $J$  = 11.0, 4.5 Hz, 1H), 2.62 (dd,  $J$  = 8.2, 3.3 Hz, 1H), 2.28 – 2.19 (m, 1H), 2.08 – 1.95 (m, 3H). **Cis-trans:**  $^1\text{H NMR}$  (400 MHz, Chloroform-*d*)  $\delta$  7.11 – 7.05 (m, 2H), 6.83 (dd,  $J$  = 8.6, 2.0 Hz, 2H), 5.74 (d,  $J$  = 5.1 Hz, 1H), 3.97 – 3.92 (m, 1H), 3.88 – 3.83 (m, 2H), 3.79 (s, 3H), 3.61 (dd,  $J$  = 9.0, 3.9 Hz, 1H), 2.62 (dd,  $J$  = 8.2, 3.3 Hz, 2H), 2.55 (ddt,  $J$  = 8.5, 5.5, 3.0 Hz, 1H), 2.28 – 2.19 (m, 1H), 2.08 – 1.95 (m, 1H), 1.89 – 1.83 (m, 1H), 1.66 – 1.57 (m, 1H).  $^{13}\text{C NMR}$  (trans & cis mixture) (101 MHz, Chloroform-*d*)  $\delta$  158.05, 158.03, 131.99, 131.96, 129.76, 129.21, 113.96, 113.90, 109.82, 109.17, 72.21, 72.19, 69.13, 67.76, 55.25, 48.36, 47.47, 45.43, 44.00, 38.69, 32.88, 31.91, 25.12. **HRMS** calculated for  $\text{C}_{14}\text{H}_{18}\text{O}_3$  ( $\text{M} + \text{Na}^+$ ): 257.1148, found: 257.1150.

### 3-benzyloctahydrofuro[2,3-b]oxepine (14)

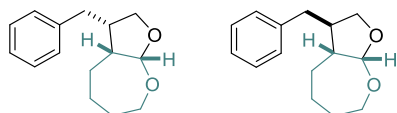

Eluent for purification: hexane: ethyl acetate = 10:1.

Colorless oil (25.1 mg, 54% yield, dr = 2.1:1). Isolated as an inseparable mixture of diastereomers. Spectral data for the two diastereomer is given herein. **Cis-syn:**  $^1\text{H NMR}$  (400 MHz, Chloroform-*d*)  $\delta$  7.30 – 7.25 (m, 2H), 7.21 – 7.13 (m, 3H), 5.22 (d,  $J$  = 5.5 Hz, 1H), 4.05 (td,  $J$  = 4.0, 1.2 Hz, 1H), 4.02 (td,  $J$  = 4.0, 1.2 Hz, 1H), 3.77 (dd,  $J$  = 8.5, 6.1 Hz, 1H), 3.69 (dd,  $J$  = 8.5, 5.9 Hz, 1H), 2.60 (dd,  $J$  = 13.4, 10.5 Hz, 1H), 2.47 – 2.30 (m, 2H), 1.86 – 1.79 (m, 2H), 1.67 (ddt,  $J$  = 8.8, 5.8, 3.2 Hz, 2H), 1.44 – 1.33 (m, 3H). **Cis-trans:**  $^1\text{H NMR}$  (400 MHz, Chloroform-*d*)  $\delta$  7.30 – 7.25 (m, 2H), 7.21 – 7.13 (m, 3H), 5.16 (d,  $J$  = 5.6 Hz, 1H), 4.15 – 4.07 (m, 2H), 3.48 (t,  $J$  = 8.5 Hz, 1H), 3.38 (ddd,  $J$  = 12.6, 6.0, 2.6 Hz, 1H), 2.83 (dd,  $J$  = 13.6, 5.3 Hz, 1H), 2.55 – 2.40 (m, 2H), 2.47 – 2.30 (m, 2H), 2.04 – 1.97 (m, 1H), 1.86 – 1.79 (m, 2H), 1.67 (ddt,  $J$  = 8.8, 5.8, 3.2 Hz, 2H), 1.44 – 1.33 (m, 2H).  $^{13}\text{C NMR}$  (trans & cis mixture) (101 MHz, Chloroform-*d*)  $\delta$  140.92, 140.04, 128.65, 128.58, 128.43, 126.17, 125.96, 109.91, 109.53,

73.29, 71.96, 69.28, 68.91, 51.10, 48.49, 45.29, 42.83, 38.21, 34.07, 32.76, 32.33, 28.85, 26.70, 25.29, 24.72. **HRMS** calculated for C<sub>15</sub>H<sub>20</sub>O<sub>2</sub> (M + Na<sup>+</sup>): 255.1356, found: 255.1355.

### 3-phenylhexahydro-2H, 5H-pyrano[2,3-b]pyran (15)

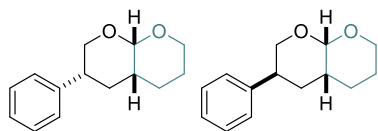

Eluent for purification: hexane: ethyl acetate = 20:1. Colorless

oil (24.0mg, 55% yield, dr = 3:1). Isolated as an inseparable mixture of diastereomers. Spectral data for the major diastereomer is given herein. **Cis-syn:** <sup>1</sup>H NMR (400 MHz, Chloroform-d) δ 7.35 – 7.29 (m, 2H), 7.26 – 7.21 (m, 3H), 4.88 (d, J = 2.2 Hz, 1H), 4.19 – 4.06 (m, 1H), 3.99 – 3.85 (m, 1H), 3.79 – 3.66 (m, 1H), 3.65 – 3.52 (m, 1H), 3.15 – 3.02 (m, 1H), 1.94-1.92 (m, 1H), 1.92 – 1.75 (m, 2H), 1.75 – 1.70 (m, 2H), 1.70 – 1.59 (m, 1H), 1.59 – 1.51 (m, 1H). **Cis-anti:** <sup>1</sup>H NMR (400 MHz, Chloroform-d) δ 7.35 – 7.29 (m, 2H), 7.26 – 7.21 (m, 3H), 4.81 (d, J = 2.6 Hz, 1H), 4.19 – 4.06 (m, 1H), 3.99 – 3.85 (m, 1H), 3.79 – 3.66 (m, 1H), 3.65 – 3.52 (m, 1H), 2.95 (tt, J = 11.9, 4.0 Hz, 1H), 2.22 (q, J = 12.5 Hz, 1H), 2.07 – 1.94 (m, 2H), 1.92 – 1.75 (m, 1H), 1.70 – 1.59 (m, 2H), 1.35 – 1.24 (m, 1H). <sup>13</sup>C NMR (trans & cis mixture) (101 MHz, Chloroform-d) δ 142.11, 141.55, 128.52, 127.42, 127.36, 126.71, 97.96, 97.23, 71.91, 67.52, 66.02, 61.68, 42.31, 36.97, 34.99, 34.81, 34.07, 29.40, 28.10, 25.03, 23.21, 20.54. **HRMS** calculated for C<sub>14</sub>H<sub>18</sub>O<sub>2</sub> (M + Na<sup>+</sup>): 241.1199, found: 241.1202.

### 3-methylhexahydro-2H, 5H-pyrano[2,3-b]pyran (16)

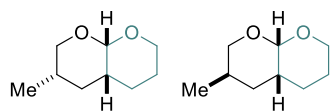

Eluent for purification: hexane: ethyl acetate = 20:1. Colorless oil

(16.2 mg, 52% yield, dr = 3:1). Isolated as an inseparable mixture of diastereomers. Spectral data for the two diastereomer is given herein. **Cis-syn:** <sup>1</sup>H NMR (400 MHz, Chloroform-d) δ 4.69 (d, J = 2.6 Hz, 1H), 3.92 (ddd, J = 11.4, 4.4, 2.5 Hz, 1H), 3.89 – 3.81 (m, 1H), 3.62 (m, 1H), 3.10 (dd, J = 11.4, 10.3 Hz, 1H), 1.83 – 1.70 (m, 3H), 1.62 – 1.50 (m, 3H), 1.48 – 1.43 (m, 1H), 1.34 – 1.25 (m, 1H), 0.78 (d, J = 6.7 Hz, 3H). **Cis-anti:** <sup>1</sup>H NMR (400 MHz, Chloroform-d) δ 4.69 (d, J = 2.6 Hz, 1H), 4.07 – 3.98 (m, 1H), 3.58 – 3.46 (m, 2H), 3.41 (t, J = 11.1 Hz, 1H), 1.83 – 1.70 (m, 3H), 1.62 – 1.50 (m, 3H), 1.41 – 1.34 (m, 1H), 1.25 – 1.17 (m, 1H), 0.81 (d, J = 6.6 Hz, 3H). <sup>13</sup>C NMR (trans & cis mixture) (101 MHz, Chloroform-d) δ 97.96, 97.30, 67.42,



67.06, 62.89, 34.59, 30.98, 30.67, 30.41, 28.12, 25.43, 20.48, 19.73, 17.27, 16.65. **HRMS** calculated for C<sub>9</sub>H<sub>16</sub>O<sub>2</sub> (M + H<sup>+</sup>): 157.1223, found: 157.1223.

#### 4-methyl-3-phenylhexahydro-2H,5H-pyrano[2,3-b]pyran (17)

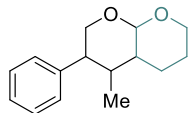

Eluent for purification: hexane: ethyl acetate = 10:1. Colorless oil (37.6 mg, 81% yield, dr = 8.3:4.3:3.3:1). Isolated as an inseparable mixture of diastereomers. Spectral data for the major diastereomer is given herein. **<sup>1</sup>H NMR** (500 MHz, Chloroform-*d*) δ 7.32 – 7.27 (m, 2H), 7.23 – 7.18 (m, 1H), 7.18 – 7.13 (m, 2H), 5.01 (d, *J* = 3.4 Hz, 1H), 4.01 (t, *J* = 8.6 Hz, 1H), 3.54 (td, *J* = 8.5, 1.9 Hz, 2H), 3.46 (ddd, *J* = 11.6, 10.5, 2.7 Hz, 1H), 2.54 – 2.47 (m, 1H), 1.94 (q, *J* = 3.3 Hz, 2H), 1.80 – 1.69 (m, 1H), 1.57 – 1.51 (m, 1H), 1.43 (m, 1H), 1.32 (m, 1H). **<sup>13</sup>C NMR (four isomers)** (101 MHz, Chloroform-*d*) δ 145.70, 145.25, 128.52, 128.44, 127.49, 127.12, 126.47, 126.37, 102.65, 102.38, 72.68, 71.81, 64.39, 64.13, 44.61, 44.16, 43.30, 43.16, 42.25, 24.06, 22.57, 21.08, 20.73, 20.55. **HRMS** calculated for C<sub>15</sub>H<sub>20</sub>O<sub>2</sub> (M + Na<sup>+</sup>): 255.1356, found: 255.1355.

#### 3-(benzofuran-5-ylmethylene)hexahydro-4H-furo[2,3-b]pyran (18)

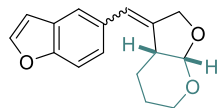

Eluent for purification: hexane: ethyl acetate = 20:1. Colorless oil (30.0 mg, 67% yield, E:Z = 4:1). Isolated as an inseparable mixture of diastereomers. Spectral data for the two isomers is given herein. **E-isomer:** **<sup>1</sup>H NMR** (400 MHz, Chloroform-*d*) δ 7.62 (d, *J* = 2.2 Hz, 1H), 7.51 – 7.44 (m, 2H), 7.22 (dd, *J* = 8.6, 1.8 Hz, 1H), 6.76 (dd, *J* = 2.3, 1.0 Hz, 1H), 6.40 (dd, *J* = 10.3, 2.3 Hz, 1H), 5.26 (d, *J* = 3.9 Hz, 1H), 4.76 (dt, *J* = 12.9, 1.9 Hz, 1H), 4.46 (dd, *J* = 12.8, 1.8 Hz, 1H), 3.95 – 3.86 (m, 1H), 3.68 (dtd, *J* = 11.1, 4.0, 1.4 Hz, 1H), 3.05 – 2.95 (m, 1H), 1.99 (m, 1H), 1.71 – 1.58 (m, 1H), 1.57 – 1.54 (m, 2H). **Z-isomer:** **<sup>1</sup>H NMR** (400 MHz, Chloroform-*d*) δ 7.62 (d, *J* = 2.2 Hz, 1H), 7.51 – 7.44 (m, 1H), 7.37 (d, *J* = 1.7 Hz, 1H), 7.12 (dd, *J* = 8.6, 1.9 Hz, 1H), 6.76 (dd, *J* = 2.3, 1.0 Hz, 1H), 6.40 (dd, *J* = 10.3, 2.3 Hz, 1H), 5.21 (d, *J* = 3.8 Hz, 1H), 4.93 (dt, *J* = 13.6, 2.5 Hz, 1H), 4.83 (dt, *J* = 13.6, 2.2 Hz, 1H), 3.95 – 3.86 (m, 1H), 3.51 (td, *J* = 11.2, 2.5 Hz, 1H), 2.85 (m, 1H), 2.18 (m, 1H), 1.71 – 1.58 (m, 1H), 1.57 – 1.54 (m, 1H), 1.29 (d, *J* = 3.8 Hz, 1H). **<sup>13</sup>C NMR (E & Z mixture)** (101 MHz, Chloroform-*d*) δ 153.95,

153.74, 145.53, 145.50, 140.70, 138.49, 132.14, 131.75, 127.76, 127.65, 124.80, 124.56, 121.64, 120.61, 120.24, 111.33, 111.26, 106.66, 106.62, 101.34, 100.62, 70.02, 70.00, 64.46, 61.56, 43.47, 38.33, 23.26, 23.03, 22.55, 20.62. **HRMS** calculated for C<sub>16</sub>H<sub>16</sub>O<sub>3</sub> (M + Na<sup>+</sup>): 279.0992, found: 279.0988.

### 3-benzylidenehexahydro-4H-furo[2,3-b]pyran (19)

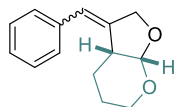

Eluent for purification: hexane: ethyl acetate = 20:1. Colorless oil (22.5 mg, 52% yield, E:Z = 5.6:1). **E-isomer:** <sup>1</sup>H NMR (400 MHz, Chloroform-*d*) δ 7.38 – 7.32 (m, 2H), 7.28 (d, *J* = 12.3 Hz, 3H), 6.31 (q, *J* = 2.0 Hz, 1H), 5.26 (d, *J* = 3.9 Hz, 1H), 4.75 (dt, *J* = 13.1, 1.9 Hz, 1H), 4.45 (ddd, *J* = 13.1, 2.0, 0.6 Hz, 1H), 3.97 – 3.86 (m, 1H), 3.69 (dtd, *J* = 11.0, 3.8, 1.4 Hz, 1H), 3.02 – 2.95 (m, 1H), 2.05 – 1.94 (m, 1H), 1.72 – 1.63 (m, 1H), 1.61 – 1.54 (m, 2H). **Z-isomer:** <sup>1</sup>H NMR (400 MHz, Chloroform-*d*) δ 7.35 (t, *J* = 7.7 Hz, 2H), 7.25 – 7.19 (m, 1H), 7.19 – 7.11 (m, 2H), 6.29 (q, *J* = 2.6 Hz, 1H), 5.20 (d, *J* = 3.8 Hz, 1H), 4.90 (dt, *J* = 13.8, 2.5 Hz, 1H), 4.80 (dt, *J* = 13.9, 2.2 Hz, 1H), 3.93 – 3.81 (m, 1H), 3.50 (td, *J* = 11.3, 2.4 Hz, 1H), 2.84 (s, 1H), 2.21 – 2.07 (m, 1H), 2.08 – 1.92 (m, 1H), 1.72 – 1.63 (m, 1H), 1.36 (dq, *J* = 13.7, 3.4 Hz, 1H). **E-isomer:** <sup>13</sup>C NMR (101 MHz, Chloroform-*d*) δ 141.89, 136.74, 128.47, 127.85, 126.90, 121.51, 101.29, 69.85, 61.46, 38.30, 23.23, 22.58. **Z-isomer:** <sup>13</sup>C NMR (101 MHz, Chloroform-*d*) δ 139.95, 136.99, 128.54, 127.91, 126.65, 120.49, 100.56, 70.01, 64.46, 43.56, 23.01, 20.59. **HRMS** calculated for C<sub>14</sub>H<sub>16</sub>O<sub>2</sub> (M + H<sup>+</sup>): 217.1123, found: 217.1124.

### 3-(4-methoxybenzylidene)hexahydro-4H-furo[2,3-b]pyran (20)

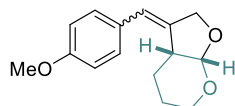

Eluent for purification: hexane: ethyl acetate = 20:1. Colorless oil (30.0 mg, 67% yield, E:Z = 4.6:1). **E-isomer:** <sup>1</sup>H NMR (500 MHz, Chloroform-*d*) δ 7.26 – 7.18 (m, 2H), 6.91 – 6.84 (m, 2H), 6.24 (q, *J* = 1.9 Hz, 1H), 5.25 (d, *J* = 3.9 Hz, 1H), 4.72 (dt, *J* = 12.8, 1.9 Hz, 1H), 4.42 (dd, *J* = 12.9, 1.8 Hz, 1H), 3.99 – 3.85 (m, 1H), 3.82 (s, 3H), 3.69 (dtd, *J* = 11.0, 3.9, 1.6 Hz, 1H), 3.03 – 2.87 (m, 1H), 2.04 – 1.95 (m, 1H), 1.67 – 1.55 (m, 3H). **Z-isomer:** <sup>1</sup>H NMR (400 MHz, Chloroform-*d*) δ 7.15 – 7.02 (m, 2H), 6.94 – 6.85 (m, 2H), 6.23 (q, *J* = 2.6 Hz, 1H), 5.19 (d, *J* = 3.8 Hz, 1H), 4.88 (dt, *J* = 13.7, 2.5 Hz, 1H), 4.77 (dt, *J* = 13.7, 2.2 Hz, 1H),

3.88 (ddt,  $J = 9.7, 4.0, 1.6$  Hz, 1H), 3.82 (s, 3H), 3.50 (ddd,  $J = 11.6, 10.9, 2.4$  Hz, 1H), 2.87 – 2.72 (m, 1H), 2.20 – 2.07 (m, 1H), 1.99 (m, 1H), 1.68 – 1.61 (m, 1H), 1.36 (dt,  $J = 13.7, 3.5$  Hz, 1H). **E-isomer:**  $^{13}\text{C NMR}$  (126 MHz, Chloroform-*d*)  $\delta$  158.57, 139.84, 129.48, 129.09, 120.96, 113.96, 101.34, 69.91, 61.47, 55.30, 38.21, 23.22, 22.65. **Z-isomer:**  $^{13}\text{C NMR}$  (101 MHz, Chloroform-*d*)  $\delta$  158.29, 137.45, 129.89, 129.14, 119.82, 113.99, 100.59, 70.01, 64.45, 55.28, 43.41, 23.00, 20.60. **HRMS** calculated for  $\text{C}_{15}\text{H}_{18}\text{O}_3$  ( $\text{M} + \text{Na}^+$ ): 269.1148, found: 269.1147.

### 3-benzyl-4,5-bis(benzyloxy)-6-((benzyloxy)methyl)hexahydro-4H-furo[2,3-b]pyran (21)

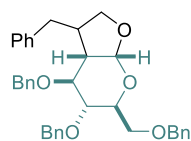

Eluent for purification: hexane: ethyl acetate = 6:1. Colorless oil (47.3 mg, 43% yield, dr = 1.8:1.6:1.2:1). Isolated as an inseparable mixture of diastereomers. Spectral data for the major diastereomer is given herein.  $^1\text{H NMR}$  (400 MHz, Chloroform-*d*)  $\delta$  7.38 – 7.15 (m, 18H), 7.11 – 7.01 (m, 2H), 5.57 (d,  $J = 5.3$  Hz, 1H), 4.69 – 4.50 (m, 5H), 4.44 (d,  $J = 11.0$  Hz, 1H), 4.08 (dd,  $J = 8.9, 6.7$  Hz, 1H), 3.83 (dt,  $J = 9.2, 3.1$  Hz, 1H), 3.74 (dd,  $J = 10.6, 3.8$  Hz, 1H), 3.70 – 3.62 (m, 2H), 3.58 (dd,  $J = 8.9, 4.3$  Hz, 1H), 3.43 (t,  $J = 6.8$  Hz, 1H), 2.65 (d,  $J = 7.8$  Hz, 2H), 2.51 (dq,  $J = 11.2, 3.6$  Hz, 1H), 2.27 – 2.14 (m, 1H).  $^{13}\text{C NMR}$  (four isomers) (101 MHz, Chloroform-*d*)  $\delta$  140.10, 139.46, 138.46, 138.43, 138.41, 138.12, 138.08, 138.01, 129.06, 128.89, 128.63, 128.55, 128.52, 128.49, 128.46, 128.42, 128.40, 128.36, 128.34, 128.32, 128.30, 127.98, 127.92, 127.89, 127.84, 127.78, 127.75, 127.72, 127.70, 127.58, 127.55, 127.43, 127.38, 126.36, 126.29, 126.17, 102.55, 102.33, 102.24, 101.15, 81.20, 80.88, 79.23, 79.07, 77.54, 77.25, 77.19, 75.69, 75.25, 74.91, 74.85, 74.50, 74.40, 74.12, 73.99, 73.93, 73.70, 73.62, 73.50, 73.46, 73.40, 73.31, 72.90, 72.00, 71.67, 71.55, 71.53, 70.83, 69.32, 69.22, 69.08, 68.47, 49.71, 47.73, 46.68, 46.36, 42.71, 42.54, 40.43, 40.39, 39.60, 38.88, 38.23, 34.87. **HRMS** calculated for  $\text{C}_{36}\text{H}_{38}\text{O}_5$  ( $\text{M} + \text{H}^+$ ): 551.2792, found: 551.2789.

### 3-benzyl-4,5-dimethoxy-6-(methoxymethyl)hexahydro-4H-furo[2,3-b]pyran (22)

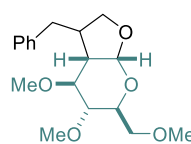

Eluent for purification: hexane: ethyl acetate = 6:1. Colorless oil (31.2 mg, 47%

yield, dr = 1.5:1.5:1.4:1). Isolated as an inseparable mixture of diastereomers. Spectral data for the major diastereomer is given herein. **<sup>1</sup>H NMR** (400 MHz, Chloroform-*d*) δ 7.31 – 7.26 (m, 2H), 7.21 – 7.15 (m, 3H), 5.40 (d, *J* = 4.3 Hz, 1H), 3.81 (t, *J* = 8.0 Hz, 1H), 3.76 – 3.70 (m, 1H), 3.70 – 3.64 (m, 3H), 3.63 (s, 3H), 3.57 (s, 3H), 3.42 (s, 3H), 3.41 – 3.31 (m, 2H), 3.12 (dd, *J* = 13.8, 4.9 Hz, 1H), 2.72 (dddd, *J* = 15.8, 10.6, 7.6, 5.1 Hz, 1H), 2.48 (dd, *J* = 13.8, 10.1 Hz, 1H), 2.21 (ddd, *J* = 9.4, 5.5, 4.2 Hz, 1H). **<sup>13</sup>C NMR (four isomers)** (101 MHz, Chloroform-*d*) δ 141.44, 140.55, 140.23, 139.44, 129.03, 128.86, 128.61, 128.53, 128.52, 128.41, 128.39, 128.28, 126.40, 126.24, 126.13, 125.97, 102.56, 102.42, 102.25, 101.11, 83.16, 82.66, 80.54, 80.33, 79.07, 78.32, 77.40, 76.83, 74.11, 74.06, 73.88, 73.85, 71.93, 71.72, 71.61, 71.58, 71.13, 71.02, 70.73, 70.60, 60.42, 60.23, 59.91, 59.30, 59.18, 59.06, 58.95, 58.63, 58.59, 58.54, 57.54, 48.94, 47.17, 45.81, 45.65, 42.62, 42.33, 40.31, 40.25, 39.51, 38.81, 37.89, 34.35. **HRMS** calculated for C<sub>18</sub>H<sub>26</sub>O<sub>5</sub> (M + Na<sup>+</sup>): 345.1672, found: 345.1672.

### 3-benzyl-5-methoxy-6-(methoxymethyl)hexahydro-4H-furo[2,3-b]pyran (23)

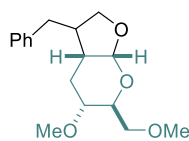

Eluent for purification: hexane: ethyl acetate = 6:1. Colorless oil (32.1 mg, 55% yield, dr = 1.3:1.2:1.2:1). Isolated as an inseparable mixture of diastereomers. Spectral data for the major diastereomer is given herein. **<sup>1</sup>H NMR** (400 MHz, Chloroform-*d*) δ 7.32 – 7.26 (m, 2H), 7.24 – 7.13 (m, 3H), 5.47 (d, *J* = 5.4 Hz, 1H), 4.23 – 4.16 (m, 1H), 3.91 – 3.73 (m, 1H), 3.71 – 3.62 (m, 1H), 3.62 – 3.52 (m, 2H), 3.39 (s, 3H), 3.35 – 3.29 (m, 1H), 3.25 (s, 3H), 2.81 – 2.47 (m, 3H), 2.19 – 2.09 (m, 1H), 2.08 – 1.98 (m, 1H), 1.93 – 1.77 (m, 1H). **<sup>13</sup>C NMR (four isomers)** (101 MHz, Chloroform-*d*) δ 140.27, 139.84, 139.80, 139.67, 128.89, 128.79, 128.59, 128.57, 128.53, 128.50, 128.38, 128.26, 126.33, 126.30, 126.26, 126.18, 103.10, 102.56, 101.96, 101.25, 75.06, 74.60, 73.77, 73.57, 73.31, 73.25, 72.36, 72.31, 72.23, 72.09, 71.61, 71.56, 71.52, 71.19, 69.88, 59.31, 59.26, 57.07, 56.59, 56.57, 56.40, 44.75, 44.64, 42.33, 42.09, 41.25, 40.25, 39.38, 38.55, 37.73, 36.85, 34.17, 33.11, 27.62, 27.56, 25.68, 22.13. **HRMS** calculated for C<sub>17</sub>H<sub>24</sub>O<sub>4</sub> (M + Na<sup>+</sup>): 315.1567, found: 315.1566.

### 3-benzyl-6-(methoxymethyl)hexahydro-4H-furo[2,3-b]pyran (24)

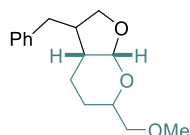

Eluent for purification: hexane: ethyl acetate = 6:1. Colorless oil (34.1 mg, 65%

yield, dr = 2.4:1.1:1:1). Isolated as an inseparable mixture of diastereomers. Spectral data for the major diastereomer is given herein. **<sup>1</sup>H NMR** (400 MHz, Chloroform-*d*) δ 7.30 – 7.26 (m, 2H), 7.22 – 7.17 (m, 1H), 7.16 – 7.12 (m, 2H), 5.09 (d, *J* = 3.2 Hz, 1H), 4.19 (t, *J* = 8.2 Hz, 1H), 3.64 (t, *J* = 8.3 Hz, 1H), 3.58 – 3.49 (m, 1H), 3.47 – 3.41 (m, 1H), 3.39 (d, *J* = 8.8 Hz, 1H), 3.36 (s, 3H), 2.85 (dd, *J* = 12.9, 4.5 Hz, 1H), 2.67 – 2.52 (m, 2H), 1.84 (ddq, *J* = 10.1, 5.0, 2.3, 1.8 Hz, 2H), 1.76 (tt, *J* = 12.1, 3.2 Hz, 2H), 1.40 (m, 1H). **<sup>13</sup>C NMR (four isomers)** (101 MHz, Chloroform-*d*) δ 140.85, 140.04, 139.97, 139.93, 128.75, 128.62, 128.52, 128.49, 128.30, 126.23, 126.20, 126.07, 102.99, 102.65, 102.62, 101.18, 75.60, 75.47, 75.39, 75.27, 74.09, 73.55, 72.39, 71.61, 70.53, 69.56, 69.02, 68.56, 59.24, 44.90, 44.02, 42.44, 39.44, 39.09, 38.78, 38.59, 36.15, 36.01, 33.12, 25.25, 24.34, 23.67, 22.68, 21.81, 19.45. **HRMS** calculated for C<sub>16</sub>H<sub>22</sub>O<sub>3</sub> (M + Na<sup>+</sup>): 285.1461, found: 285.1465.

### 3-benzyl-4,5-dimethoxy-6-(methoxymethyl)hexahydro-4H-furo[2,3-b]pyran (25)

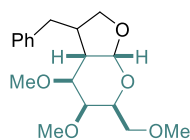

Eluent for purification: hexane: ethyl acetate = 10:1. Colorless oil (35.4 mg,

55% yield, dr = 6.7:6:5.7:1). Isolated as an inseparable mixture of diastereomers. Spectral data for the major diastereomer is given herein. **<sup>1</sup>H NMR** (500 MHz, Chloroform-*d*) δ 7.30 – 7.27 (m, 2H), 7.24 – 7.18 (m, 3H), 5.42 (d, *J* = 4.2 Hz, 1H), 3.79 – 3.76 (m, 2H), 3.71 – 3.69 (m, 1H), 3.67 – 3.65 (m, 1H), 3.64 (s, 3H), 3.57 (s, 3H), 3.44 (dd, *J* = 4.6, 1.6 Hz, 2H), 3.41 (s, 3H), 3.35 – 3.32 (m, 1H), 3.11 (dd, *J* = 9.8, 2.5 Hz, 1H), 2.75 (ddd, *J* = 7.5, 5.9, 4.2 Hz, 1H), 2.64 – 2.59 (m, 1H), 2.21 – 2.17 (m, 1H). **<sup>13</sup>C NMR (four isomers)** (126 MHz, Chloroform-*d*) δ 141.10, 140.50, 139.69, 128.91, 128.67, 128.51, 128.50, 128.37, 128.27, 126.29, 126.21, 125.90, 102.74, 102.31, 101.04, 80.87, 80.83, 80.67, 74.77, 74.20, 72.64, 71.93, 71.51, 71.30, 71.14, 70.97, 70.91, 70.91, 70.39, 69.94, 69.63, 61.05, 60.83, 60.67, 59.19, 59.19, 59.16, 57.09, 57.03, 55.49, 48.16, 44.33, 42.48, 42.41, 40.95, 40.02, 39.80, 39.00, 35.26. **HRMS** calculated for C<sub>18</sub>H<sub>26</sub>O<sub>5</sub> (M + Na<sup>+</sup>): 345.1672, found: 345.1672.

**10-benzyl-2,2,4,4-tetraisopropyl-6-methylhexahydro-6H-furo[3',2':5,6]pyrano[3,4-f][1,3,5,2,4]trioxadisilepine (26)**

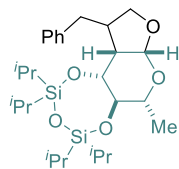

Eluent for purification: hexane: ethyl acetate = 6:1. Colorless oil (44.6 mg, 44%

yield, dr = 2.3:2.2:2.2:1). Isolated as an inseparable mixture of diastereomers. Spectral data for the major diastereomer is given herein. **<sup>1</sup>H NMR** (400 MHz, Chloroform-*d*) δ 7.31 – 7.26 (m, 2H), 7.25 – 7.12 (m, 3H), 5.44 (d, *J* = 4.5 Hz, 1H), 4.19 – 3.99 (m, 1H), 3.82 – 3.67 (m, 2H), 3.40 (t, *J* = 8.9 Hz, 1H), 3.29 – 3.22 (m, 1H), 2.79 – 2.59 (m, 1H), 2.25 (dt, *J* = 9.5, 5.0 Hz, 1H), 1.98 (dd, *J* = 9.0, 4.5 Hz, 1H), 1.37 (d, *J* = 6.2 Hz, 1H), 1.15 – 1.00 (m, 31H). **<sup>13</sup>C NMR (four isomers)** (101 MHz, Chloroform-*d*) δ 140.77, 140.22, 139.51, 129.18, 128.78, 128.69, 128.56, 128.50, 128.47, 128.43, 128.21, 126.26, 126.09, 102.31, 101.86, 101.00, 77.91, 77.57, 77.21, 76.74, 76.33, 75.89, 74.01, 73.61, 73.52, 71.10, 71.06, 70.59, 70.54, 69.36, 68.63, 52.26, 49.36, 48.29, 43.41, 42.58, 41.05, 39.82, 39.00, 35.08, 18.14, 17.92, 17.90, 17.81, 17.75, 17.71, 17.67, 17.60, 17.53, 17.49, 17.44, 17.42, 17.38, 17.32, 17.30, 17.30, 17.25, 17.23, 17.21, 16.99, 13.48, 12.98, 12.97, 12.92, 12.87, 12.78, 12.76, 12.73, 12.71, 12.34, 12.24, 12.20, 12.19.

**HRMS** calculated for C<sub>27</sub>H<sub>46</sub>O<sub>5</sub>Si<sub>2</sub> (M + Na<sup>+</sup>): 529.2776, found: 529.2768.

**3-benzyl-4,5-dimethoxy-6-methylhexahydro-4H-furo[2,3-b]pyran (27)**

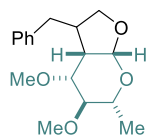

Eluent for purification: hexane: ethyl acetate = 10:1. Colorless oil (36.7mg, 77%

yield, dr = 2.3:2:1.2:1). Isolated as an inseparable mixture of diastereomers. Spectral data for the major diastereomer is given herein. **<sup>1</sup>H NMR** (400 MHz, Chloroform-*d*) δ 7.33 – 7.26 (m, 2H), 7.20 (t, *J* = 6.9 Hz, 3H), 5.44 (d, *J* = 5.7 Hz, 1H), 4.18 (dd, *J* = 8.8, 6.6 Hz, 1H), 3.70 – 3.63 (m, 1H), 3.63 (s, 3H), 3.37 (d, *J* = 4.2 Hz, 3H), 3.32 (t, *J* = 9.2 Hz, 1H), 3.05 – 2.95 (m, 2H), 2.83 (dd, *J* = 8.9, 5.4 Hz, 1H), 2.76 – 2.68 (m, 1H), 2.53 – 2.36 (m, 1H), 2.17 (dq, *J* = 20.3, 5.3 Hz, 1H), 1.29 (t, *J* = 6.5 Hz, 3H). **<sup>13</sup>C NMR (four isomers)** (101 MHz, Chloroform-*d*) δ 141.41, 140.62, 140.28, 139.48, 129.03, 128.85, 128.56, 128.54, 128.51, 128.44, 128.41, 128.29,

126.40, 126.23, 126.13, 126.01, 102.25, 102.13, 101.92, 100.85, 86.91, 84.50, 83.46, 83.03, 82.72, 82.57, 80.11, 78.74, 77.23, 74.06, 73.80, 71.75, 70.69, 70.53, 70.23, 68.00, 67.55, 60.78, 60.60, 60.43, 59.04, 58.76, 58.51, 58.44, 57.54, 48.97, 47.30, 45.97, 42.70, 42.35, 40.39, 40.21, 39.54, 38.95, 38.20, 34.32, 18.65, 18.42, 17.94, 17.40. **HRMS** calculated for C<sub>17</sub>H<sub>24</sub>O<sub>4</sub> (M + Na<sup>+</sup>): 315.1567, found: 315.1565.

#### 4-benzyl-2-ethoxytetrahydrofuran (28)

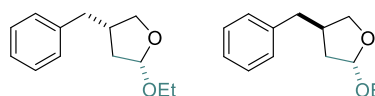

Eluent for purification: hexane: ethyl acetate = 100:1.

Colorless oil (33.4 mg, 81% yield, dr = 1.4:1). Isolated as an inseparable mixture of diastereomers. Spectral data for the two diastereomers is given herein. **cis-isomer:** <sup>1</sup>H NMR (500 MHz, Chloroform-*d*) δ 7.29 (dd, *J* = 8.1, 6.8 Hz, 3H), 7.23 – 7.15 (m, 2H), 5.19 – 5.09 (m, 1H), 3.91 (dd, *J* = 8.4, 7.1 Hz, 1H), 3.74 (ddq, *J* = 27.0, 9.6, 7.1 Hz, 1H), 3.65 – 3.55 (m, 1H), 3.44 (ddq, *J* = 18.4, 9.6, 7.1 Hz, 1H), 2.84 – 2.71 (m, 2H), 2.49 (ddd, *J* = 15.9, 8.7, 7.4 Hz, 1H), 2.21 (ddd, *J* = 13.3, 9.1, 5.6 Hz, 1H), 1.67 – 1.58 (m, 1H), 1.23 (t, *J* = 7.1 Hz, 3H). **trans-isomer:** <sup>1</sup>H NMR (500 MHz, Chloroform-*d*) δ 7.29 (dd, *J* = 8.1, 6.8 Hz, 3H), 7.23 – 7.15 (m, 2H), 5.19 – 5.09 (m, 1H), 3.99 (dd, *J* = 8.4, 7.0 Hz, 1H), 3.74 (ddq, *J* = 27.0, 9.6, 7.1 Hz, 1H), 3.65 – 3.55 (m, 1H), 3.44 (ddq, *J* = 18.4, 9.6, 7.1 Hz, 1H), 2.74 – 2.64 (m, 3H), 2.00 (ddd, *J* = 13.1, 7.1, 1.3 Hz, 1H), 1.71 (ddd, *J* = 13.2, 7.9, 5.2 Hz, 1H), 1.18 (t, *J* = 7.1 Hz, 3H). <sup>13</sup>C NMR (**trans & cis mixture**) (126 MHz, Chloroform-*d*) δ 140.86, 140.56, 128.69, 128.62, 128.44, 126.13, 126.05, 104.42, 103.95, 71.79, 71.72, 63.09, 62.69, 40.15, 39.93, 39.28, 39.16, 38.83, 15.37, 15.26. **HRMS** calculated for C<sub>13</sub>H<sub>18</sub>O<sub>2</sub> (M + Na<sup>+</sup>): 229.1199, found: 229.1197.

#### 2-ethoxy-4-(naphthalen-2-ylmethyl)tetrahydrofuran (29)

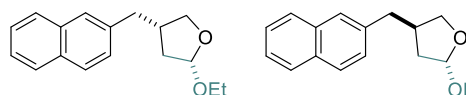

Eluent for purification: hexane: ethyl acetate = 100:1.

Colorless oil (32.3 mg, 63% yield, dr = 1.1:1). Isolated as an inseparable mixture of diastereomers. Spectral data for the two diastereomers is given herein. **cis-isomer:** <sup>1</sup>H NMR (400 MHz, Chloroform-*d*) δ 7.83 – 7.75 (m, 3H), 7.64 – 7.59 (m, 1H), 7.45 (pd, *J* = 6.9, 1.6 Hz, 2H), 7.32 (dt, *J* = 8.4, 2.0 Hz, 1H), 5.20 – 5.13 (m, 1H), 3.94 (dd, *J* = 8.3, 7.2 Hz, 1H), 3.82 –

3.61 (m, 2H), 3.46 (ddq,  $J = 16.8, 9.7, 7.0$  Hz, 1H), 2.95 (dd,  $J = 7.8, 2.1$  Hz, 2H), 2.60 (ddd,  $J = 15.8, 8.6, 7.3$  Hz, 1H), 2.23 (ddd,  $J = 13.4, 9.1, 5.6$  Hz, 1H), 1.73 – 1.67 (m, 1H), 1.26 (t,  $J = 7.0$  Hz, 3H). **trans-isomer:**  $^1\text{H NMR}$  (400 MHz, Chloroform-*d*)  $\delta$  7.83 – 7.75 (m, 3H), 7.64 – 7.59 (m, 1H), 7.45 (pd,  $J = 6.9, 1.6$  Hz, 2H), 7.32 (dt,  $J = 8.4, 2.0$  Hz, 1H), 5.20 – 5.13 (m, 1H), 4.04 – 3.98 (m, 1H), 3.82 – 3.61 (m, 2H), 3.46 (ddq,  $J = 16.8, 9.7, 7.0$  Hz, 1H), 2.89 – 2.80 (m, 3H), 2.04 (ddd,  $J = 12.8, 6.2, 1.9$  Hz, 1H), 1.77 (ddd,  $J = 12.7, 7.5, 5.2$  Hz, 1H), 1.19 (t,  $J = 7.1$  Hz, 3H).  $^{13}\text{C NMR}$  (**trans & cis mixture**) (101 MHz, Chloroform-*d*)  $\delta$  138.35, 138.06, 133.59, 133.55, 128.04, 128.02, 127.61, 127.46, 127.31, 127.29, 126.85, 126.77, 126.01, 125.98, 125.32, 125.28, 104.41, 103.95, 71.74, 63.10, 62.70, 40.10, 40.04, 39.45, 39.17, 38.82, 38.70, 15.38, 15.25. **HRMS** calculated for  $\text{C}_{17}\text{H}_{20}\text{O}_2$  ( $\text{M} + \text{Na}^+$ ): 279.1356, found: 279.1355.

#### 4-benzyl-2-ethoxy-3-methyltetrahydrofuran (30)

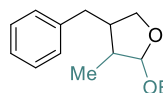

Eluent for purification: hexane: ethyl acetate = 100:1. Colorless oil (39.6 mg, 90% yield, dr = 2.4:2:1.7:1). Isolated as an inseparable mixture of diastereomers. Spectral data for the major diastereomers is given herein.  $^1\text{H NMR}$  (400 MHz, Chloroform-*d*)  $\delta$  7.29 (m, 2H), 7.23 – 7.15 (m, 3H), 4.91 (d,  $J = 4.8$  Hz, 1H), 4.00 – 3.89 (m, 1H), 3.84 – 3.62 (m, 1H), 3.55 (t,  $J = 8.3$  Hz, 1H), 3.44 (m, 1H), 2.96 – 2.75 (m, 2H), 2.59 – 2.45 (m, 1H), 2.39 – 2.28 (m, 1H), 1.24 (td,  $J = 7.1, 0.9$  Hz, 3H), 1.03 – 0.99 (m, 3H).  $^{13}\text{C NMR}$  (**four isomers**) (101 MHz, Chloroform-*d*)  $\delta$  141.51, 140.77, 140.56, 140.47, 128.80, 128.59, 128.52, 128.44, 128.42, 128.39, 128.35, 126.06, 126.02, 125.80, 110.88, 110.04, 105.52, 105.37, 72.47, 72.09, 71.36, 71.22, 63.42, 63.07, 62.79, 62.74, 48.15, 46.06, 44.73, 44.23, 42.03, 41.48, 41.47, 40.49, 38.87, 38.32, 35.53, 33.79, 16.94, 15.45, 15.36, 15.27, 15.24, 11.76, 11.68, 9.14. **HRMS** calculated for  $\text{C}_{14}\text{H}_{20}\text{O}_2$  ( $\text{M} + \text{Na}^+$ ): 243.1356, found: 243.1354.

#### 2-ethoxy-4-(4-fluorobenzyl)-3-methyltetrahydrofuran (31)

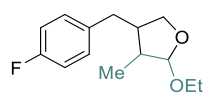

Eluent for purification: hexane: ethyl acetate = 100:1. Colorless oil (33.3mg, 70% yield, dr = 1.8:1.6:1.1:1). Isolated as an inseparable mixture of diastereomers. Spectral data for the major diastereomers is given herein.  $^1\text{H NMR}$  (400 MHz, Chloroform-*d*)  $\delta$  7.16 –



7.06 (m, 2H), 6.95 (td,  $J = 8.7, 1.8$  Hz, 2H), 4.70 (d,  $J = 3.1$  Hz, 1H), 3.96 – 3.87 (m, 1H), 3.80 – 3.69 (m, 1H), 3.64 – 3.59 (m, 1H), 3.47 – 3.38 (m, 1H), 2.90 – 2.69 (m, 2H), 2.67 – 2.58 (m, 1H), 2.00 (tq,  $J = 8.7, 7.0$  Hz, 1H), 1.23 – 1.20 (m, 3H), 0.98 (dd,  $J = 7.2$  Hz, 3H).  **$^{13}\text{C}$  NMR (four isomers)** (101 MHz, Chloroform-*d*)  $\delta$  162.59, 162.58, 160.17, 160.15, 137.09 (d,  $J = 3.2$  Hz), 136.19 (d,  $J = 3.2$  Hz), 136.09 (d,  $J = 3.2$  Hz), 130.08 (d,  $J = 7.7$  Hz), 129.95 (d,  $J = 7.7$  Hz), 129.93 (d,  $J = 7.9$  Hz), 129.76, 115.29 (d,  $J = 21.1$  Hz),, 115.27 (d,  $J = 21.2$  Hz), 115.24 (d,  $J = 21.3$  Hz), 115.18 (d,  $J = 21.1$  Hz), 110.81, 110.00, 105.51, 105.32, 72.31, 71.94, 71.24, 71.06, 63.37, 63.07, 62.81, 62.75, 48.20, 45.89, 44.84, 44.17, 41.93, 41.57, 40.48, 38.04, 37.55, 34.74, 32.95, 17.01, 15.42, 15.33, 15.23, 15.20, 11.75, 11.61, 9.11. **HRMS** calculated for  $\text{C}_{14}\text{H}_{19}\text{FO}_2$  ( $\text{M} + \text{Na}^+$ ): 261.1261, found: 261.1260.

#### 2-ethoxy-4-ethyl-3-phenyltetrahydrofuran (32)

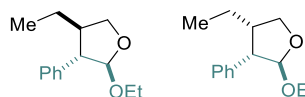

Eluent for purification: hexane: ethyl acetate = 100:1. Colorless oil (35.7 mg, 81% yield, dr = 5:1). Isolated as an inseparable mixture of diastereomers. Spectral data for the two diastereomers is given herein. **trans-trans-isomer:**  **$^1\text{H}$  NMR** (500 MHz, Chloroform-*d*)  $\delta$  7.35 – 7.29 (m, 2H), 7.28 – 7.18 (m, 3H), 5.05 (d,  $J = 3.2$  Hz, 1H), 4.23 (dt,  $J = 12.0, 8.1$  Hz, 1H), 3.81 – 3.68 (m, 2H), 3.51 – 3.37 (m, 1H), 2.89 (dd,  $J = 8.2, 3.3$  Hz, 1H), 2.28 – 2.18 (m, 1H), 1.65 – 1.57 (m, 1H), 1.50 – 1.41 (m, 1H), 1.20 (t,  $J = 7.1$  Hz, 3H), 0.86 (t,  $J = 7.5$  Hz, 3H). **cis-trans-isomer:**  **$^1\text{H}$  NMR** (500 MHz, Chloroform-*d*)  $\delta$  7.35 – 7.29 (m, 2H), 7.28 – 7.18 (m, 3H), 5.13 (s, 1H), 4.23 (dt,  $J = 12.0, 8.1$  Hz, 1H), 3.81 – 3.68 (m, 1H), 3.65 (dd,  $J = 9.5, 8.3$  Hz, 1H), 3.51 – 3.37 (m, 1H), 3.31 (d,  $J = 7.5$  Hz, 1H), 2.75 (m, 1H), 1.73 – 1.68 (m, 1H), 1.23 (t,  $J = 7.1$  Hz, 3H), 1.08 (dt,  $J = 13.8, 7.0$  Hz, 1H), 0.82 (t,  $J = 7.2$  Hz, 3H).  **$^{13}\text{C}$  NMR** (126 MHz, Chloroform-*d*)  $\delta$  142.21, 138.60, 128.72, 128.61, 128.33, 127.72, 126.57, 110.89, 108.97, 72.55, 72.18, 63.43, 62.64, 58.96, 54.58, 50.26, 43.25, 24.93, 21.74, 15.32, 15.30, 13.07, 12.81. **HRMS** calculated for  $\text{C}_{14}\text{H}_{20}\text{O}_2$  ( $\text{M} + \text{Na}^+$ ): 243.1356, found: 243.1356.

#### 4-butyl-2-ethoxy-3-phenyltetrahydrofuran (33)

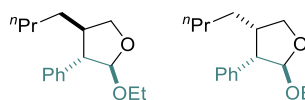

Eluent for purification: hexane: ethyl acetate = 100:1. Colorless oil

(44.7 mg, 90% yield, dr = 7.7:1). Isolated as an inseparable mixture of diastereomers. Spectral data for the two diastereomers is given herein. **trans-trans-isomer:**  $^1\text{H NMR}$  (400 MHz, Chloroform-*d*)  $\delta$  7.35 – 7.28 (m, 2H), 7.27 – 7.16 (m, 3H), 5.03 (d,  $J$  = 3.3 Hz, 1H), 4.25 – 4.16 (m, 1H), 3.78 – 3.67 (m, 2H), 3.41 (dq,  $J$  = 9.6, 7.0 Hz, 1H), 2.87 (dd,  $J$  = 8.4, 3.3 Hz, 1H), 2.27 (dtdd,  $J$  = 9.9, 8.6, 7.2, 5.5 Hz, 1H), 1.60 – 1.48 (m, 1H), 1.44 – 1.35 (m, 1H), 1.25 – 1.14 (m, 7H), 0.82 (t,  $J$  = 7.0 Hz, 3H). **cis-trans-isomer:**  $^1\text{H NMR}$  (400 MHz, Chloroform-*d*)  $\delta$  7.35 – 7.28 (m, 2H), 7.27 – 7.16 (m, 3H), 5.12 (s, 1H), 4.25 – 4.16 (m, 1H), 3.78 – 3.67 (m, 1H), 3.66 – 3.59 (m, 1H), 3.41 (dq,  $J$  = 9.6, 7.0 Hz, 1H), 3.28 (d,  $J$  = 7.5 Hz, 1H), 2.84 – 2.75 (m, 1H), 1.60 – 1.48 (m, 1H), 1.25 – 1.14 (m, 7H), 1.06 – 1.02 (m, 1H), 0.82 (t,  $J$  = 7.0 Hz, 3H).  $^{13}\text{C NMR}$  (101 MHz, Chloroform-*d*)  $\delta$  142.06, 138.57, 128.66, 128.56, 128.28, 127.70, 126.54, 126.51, 110.81, 108.86, 72.74, 72.31, 63.43, 61.85, 59.20, 54.65, 48.60, 41.25, 31.64, 30.59, 28.23, 22.80, 22.69, 15.29, 15.25, 13.91. **HRMS** calculated for  $\text{C}_{16}\text{H}_{24}\text{O}_2$  ( $\text{M} + \text{Na}^+$ ): 271.1669, found: 271.1671.

#### 2-ethoxy-4-isopropyl-3-phenyltetrahydrofuran (34)

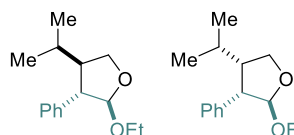

Eluent for purification: hexane: ethyl acetate = 100:1. Colorless oil

(43.7 mg, 88% yield, dr = 2.8:1). Isolated as an inseparable mixture of diastereomers. Spectral data for the two diastereomers is given herein. **trans-trans-isomer:**  $^1\text{H NMR}$  (400 MHz, Chloroform-*d*)  $\delta$  7.34 – 7.18 (m, 5H), 4.95 (d,  $J$  = 2.5 Hz, 1H), 4.17 (t,  $J$  = 8.0 Hz, 1H), 3.82 – 3.64 (m, 2H), 3.49 – 3.34 (m, 1H), 3.01 (dd,  $J$  = 7.4, 2.5 Hz, 1H), 2.15 – 2.03 (m, 1H), 1.75 (dp,  $J$  = 8.8, 6.6 Hz, 1H), 1.20 (dt,  $J$  = 16.8, 7.1 Hz, 3H), 0.87 – 0.82 (m, 6H). **cis-trans-isomer:**  $^1\text{H NMR}$  (400 MHz, Chloroform-*d*)  $\delta$  7.34 – 7.18 (m, 5H), 5.01 (s, 1H), 4.22 (t,  $J$  = 8.5 Hz, 1H), 3.82 – 3.64 (m, 2H), 3.49 – 3.34 (m, 1H), 3.30 (d,  $J$  = 7.2 Hz, 1H), 2.53 (tdd,  $J$  = 10.7, 8.6, 7.1 Hz, 1H), 1.20 (dt,  $J$  = 16.8, 7.1 Hz, 3H), 1.08 (dq,  $J$  = 10.9, 6.5 Hz, 1H), 0.87 – 0.82 (m, 3H), 0.77 (d,  $J$  = 6.6 Hz, 3H).  $^{13}\text{C NMR}$  (101 MHz, Chloroform-*d*)  $\delta$  143.65, 138.72, 129.03, 128.53, 128.30, 127.74, 126.58, 126.32, 111.23, 109.49, 71.55, 71.03, 62.99, 62.50, 57.41, 55.58, 54.08, 49.24, 31.48, 27.41, 21.93, 21.85, 21.70, 21.04, 15.27. **HRMS** calculated for  $\text{C}_{15}\text{H}_{22}\text{O}_2$  ( $\text{M} + \text{Na}^+$ ): 257.1512, found: 257.1511.

### 2-ethoxy-4,4-dimethyl-3-phenyltetrahydrofuran (35)

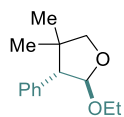

Eluent for purification: hexane: ethyl acetate = 100:1. Colorless oil (22.0 mg, 50% yield). **<sup>1</sup>H NMR** (400 MHz, Chloroform-*d*)  $\delta$  7.29 – 7.22 (m, 2H), 7.22 – 7.17 (m, 1H), 7.14 – 7.08 (m, 2H), 5.34 (d, *J* = 4.8 Hz, 1H), 3.88 – 3.79 (m, 1H), 3.73 (dq, *J* = 9.5, 7.1 Hz, 1H), 3.66 (d, *J* = 8.1 Hz, 1H), 3.39 (dq, *J* = 9.5, 7.1 Hz, 1H), 2.93 (d, *J* = 4.8 Hz, 1H), 1.11 (t, *J* = 7.1 Hz, 3H), 1.03 (s, 3H), 0.69 (s, 3H). **<sup>13</sup>C NMR** (101 MHz, Chloroform-*d*)  $\delta$  137.38, 128.91, 128.17, 126.74, 109.17, 80.00, 64.00, 62.54, 43.39, 24.75, 22.86, 15.30. **HRMS** calculated for C<sub>14</sub>H<sub>20</sub>O<sub>2</sub> (M + Na<sup>+</sup>): 243.1356, found: 243.1355.

### 4-ethyl-2-methoxy-3-phenyltetrahydrofuran (36)

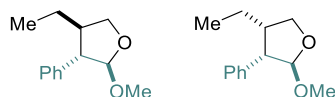

Eluent for purification: hexane: ethyl acetate = 100:1. Colorless oil (28.4 mg, 69% yield, dr = 5:1). Isolated as an inseparable mixture of diastereomers. Spectral data for the two diastereomers is given herein. **trans-trans-isomer:** **<sup>1</sup>H NMR** (400 MHz, Chloroform-*d*)  $\delta$  7.27 – 7.21 (m, 2H), 7.18 – 7.09 (m, 3H), 4.86 (d, *J* = 3.1 Hz, 1H), 4.20 – 4.11 (m, 1H), 3.59 (ddd, *J* = 12.6, 9.7, 8.4 Hz, 1H), 3.27 (s, 3H), 2.79 (dd, *J* = 8.2, 3.1 Hz, 1H), 2.15 (dtdd, *J* = 9.9, 8.3, 7.3, 5.7 Hz, 1H), 1.51 (dtd, *J* = 15.0, 7.5, 5.7 Hz, 1H), 1.45 – 1.29 (m, 1H), 0.77 (t, *J* = 7.4 Hz, 3H). **cis-trans-isomer:** **<sup>1</sup>H NMR** (400 MHz, Chloroform-*d*)  $\delta$  7.27 – 7.21 (m, 2H), 7.18 – 7.09 (m, 3H), 4.93 (s, 1H), 4.20 – 4.11 (m, 1H), 3.59 (ddd, *J* = 12.6, 9.7, 8.4 Hz, 1H), 3.31 (s, 3H), 3.22 (d, *J* = 7.5 Hz, 1H), 2.69 – 2.56 (m, 1H), 1.51 (dtd, *J* = 15.0, 7.5, 5.7 Hz, 1H), 1.45 – 1.29 (m, 1H), 0.77 (t, *J* = 7.4 Hz, 3H). **<sup>13</sup>C NMR (trans & cis mixture)** (126 MHz, Chloroform-*d*)  $\delta$  205.16, 204.81, 157.10, 154.80, 128.78, 123.41, 123.38, 122.56, 120.34, 110.83, 110.80, 103.78, 103.73, 57.67, 57.54, 33.58, 33.35, 32.95, 31.89, 19.76, 17.95, 16.83, 16.45, 12.21, 12.09. **HRMS** calculated for C<sub>13</sub>H<sub>18</sub>O<sub>2</sub> (M + H<sup>+</sup>): 207.1380, found: 207.1370.

### 2-ethoxy-4-((E)-hept-4-en-1-yl)-3-phenyltetrahydrofuran (37)

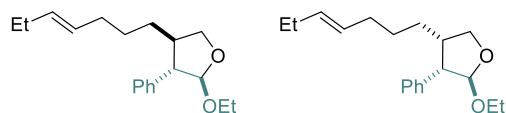

Eluent for purification: hexane: ethyl acetate =

100:1. Colorless oil (30.6 mg, 53% yield, dr = 5:1). Isolated as an inseparable mixture of

diastereomers. Spectral data for the two diastereomers is given herein. **trans-trans-isomer:**

**<sup>1</sup>H NMR** (400 MHz, Chloroform-*d*)  $\delta$  7.34 – 7.27 (m, 2H), 7.26 – 7.20 (m, 3H), 5.38 – 5.23 (m, 2H), 5.02 (d,  $J$  = 3.3 Hz, 1H), 4.24 – 4.16 (m, 1H), 3.80 – 3.65 (m, 2H), 3.49 – 3.35 (m, 1H), 2.87 (dd,  $J$  = 8.4, 3.3 Hz, 1H), 2.27 (dtdd,  $J$  = 10.0, 8.6, 7.3, 5.6 Hz, 1H), 1.99 – 1.87 (m, 4H), 1.54 (ddd,  $J$  = 13.2, 10.7, 6.3 Hz, 1H), 1.40 (dtd,  $J$  = 13.2, 8.7, 6.5 Hz, 1H), 1.28 – 1.23 (m, 3H),

1.19 (t,  $J$  = 7.2 Hz, 3H), 0.92 (t,  $J$  = 7.2 Hz, 3H). **cis-trans-isomer:** **<sup>1</sup>H NMR** (400 MHz, Chloroform-*d*)  $\delta$  7.34 – 7.27 (m, 2H), 7.26 – 7.20 (m, 2H), 7.19 – 7.15 (m, 1H), 5.38 – 5.23 (m, 2H), 5.11 (s, 1H), 4.24 – 4.16 (m, 1H), 3.80 – 3.65 (m, 1H), 3.62 (dd,  $J$  = 9.6, 8.2 Hz, 1H), 3.49 – 3.35 (m, 1H), 3.28 (d,  $J$  = 7.5 Hz, 1H), 2.79 (dt,  $J$  = 16.6, 8.3 Hz, 1H), 1.99 – 1.87 (m, 4H),

1.54 (ddd,  $J$  = 13.2, 10.7, 6.3 Hz, 1H), 1.40 (dtd,  $J$  = 13.2, 8.7, 6.5 Hz, 1H), 1.28 – 1.23 (m, 3H), 1.19 (t,  $J$  = 7.2 Hz, 3H), 0.92 (t,  $J$  = 7.2 Hz, 3H). **<sup>13</sup>C NMR (trans & cis mixture)** (101 MHz, Chloroform-*d*)  $\delta$  142.05, 141.99, 132.37, 131.93, 128.66, 128.56, 127.69, 126.55, 110.81, 108.86, 72.69, 72.69, 63.44, 63.42, 59.14, 54.59, 48.45, 41.19, 32.56, 32.38, 31.59, 31.35, 28.56, 28.33, 25.52, 20.45, 15.27, 14.30, 13.90. **HRMS** calculated for C<sub>19</sub>H<sub>28</sub>O<sub>2</sub> (M + Na<sup>+</sup>):

311.1982, found: 311.1981.

#### 4-(2-((3R,5R,7R)-adamantan-1-yl)ethyl)-2-ethoxy-3-phenyltetrahydrofuran (38)

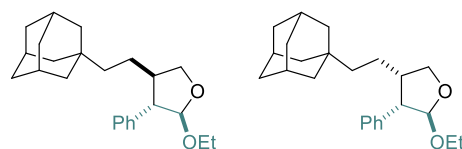

Eluent for purification: hexane: ethyl acetate = 100:1.

Colorless oil (51.0 mg, 72% yield, dr = 7.1:1). Isolated as an inseparable mixture of

diastereomers. Spectral data for the two diastereomers is given herein. **trans-trans-isomer:**

**<sup>1</sup>H NMR** (400 MHz, Chloroform-*d*)  $\delta$  7.35 – 7.28 (m, 2H), 7.27 – 7.16 (m, 3H), 5.02 (d,  $J$  = 3.3 Hz, 1H), 4.19 (dd,  $J$  = 8.2, 7.2 Hz, 1H), 3.81 – 3.57 (m, 2H), 3.43 (ddq,  $J$  = 16.7, 9.7, 7.0 Hz, 1H), 2.87 (dd,  $J$  = 8.2, 3.2 Hz, 1H), 2.18 (dddd,  $J$  = 13.1, 9.8, 8.7, 7.4 Hz, 1H), 1.95 – 1.87 (m, 3H), 1.71 – 1.47 (m, 8H), 1.39 (d,  $J$  = 2.8 Hz, 6H), 1.18 (t,  $J$  = 7.1 Hz, 3H), 1.02 – 0.85 (m, 2H).

**cis-trans-isomer:** **<sup>1</sup>H NMR** (400 MHz, Chloroform-*d*)  $\delta$  7.35 – 7.28 (m, 2H), 7.27 – 7.16 (m,

3H), 5.10 (s, 1H), 4.19 (dd,  $J = 8.2, 7.2$  Hz, 1H), 3.81 – 3.57 (m, 2H), 3.43 (ddq,  $J = 16.7, 9.7, 7.0$  Hz, 1H), 3.28 (d,  $J = 7.5$  Hz, 1H), 2.70 (qd,  $J = 9.0, 4.4$  Hz, 1H), 1.95 – 1.87 (m, 2H), 1.87 – 1.80 (m, 1H), 1.71 – 1.47 (m, 8H), 1.37 – 1.30 (m, 6H), 1.18 (t,  $J = 7.1$  Hz, 3H), 1.02 – 0.85 (m, 3H).  **$^{13}\text{C}$  NMR (trans & cis mixture)** (101 MHz, Chloroform-*d*)  $\delta$  142.20, 138.39, 128.75, 128.56, 128.24, 127.70, 126.53, 126.51, 110.83, 108.97, 72.78, 72.38, 63.38, 62.56, 59.24, 54.37, 49.09, 43.41, 43.06, 42.31, 42.19, 41.99, 37.20, 37.14, 37.10, 32.13, 32.05, 29.69, 28.83, 28.68, 28.63, 24.92, 20.97, 15.29, 15.27. **HRMS** calculated for  $\text{C}_{24}\text{H}_{34}\text{O}_2$  ( $\text{M} + \text{Na}^+$ ): 377.2451, found: 377.2453.

**(3aS,5aR,8aR,8bS)-5-((5-ethoxy-4-phenyltetrahydrofuran-3-yl)methyl)-2,2,7,7**

**tetramethyltetrahydro-5H-bis([1,3]dioxolo)[4,5-b:4',5'-d]pyran (39)**

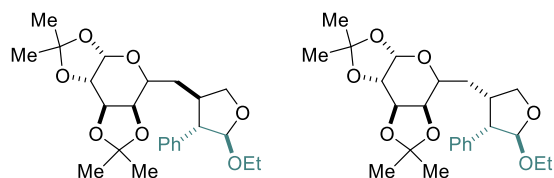

Eluent for purification: hexane: ethyl acetate =

10:1. Colorless oil (Z: 42 mg, 78% yield, dr = 2.6:2:1; E: 42 mg, 69% yield, dr = 1.1:1). Isolated as an inseparable mixture of diastereomers. Spectral data for the major diastereomers is given herein.  **$^1\text{H}$  NMR** (400 MHz, Chloroform-*d*)  $\delta$  7.34 – 7.14 (m, 5H), 5.47 (dd,  $J = 5.2, 1.9$  Hz, 1H), 5.01 (t,  $J = 3.2$  Hz, 1H), 4.51 (m, 1H), 4.34 – 4.21 (m, 2H), 3.95 – 3.93 (m, 1H), 3.80 – 3.69 (m, 2H), 3.64 – 3.56 (m, 1H), 3.39 (m, 1H), 2.90 (dt,  $J = 8.7, 3.1$  Hz, 1H), 2.62 – 2.52 (m, 1H), 1.79 – 1.76 (m, 1H), 1.63 – 1.49 (m, 1H), 1.50 (s, 3H), 1.44 – 1.37 (m, 9H), 1.17 (td,  $J = 7.1, 2.5$  Hz, 3H).  **$^{13}\text{C}$  NMR (trans & cis mixture)** (101 MHz, Chloroform-*d*)  $\delta$  141.39, 141.35, 138.51, 128.68, 128.57, 128.44, 127.85, 127.77, 126.65, 126.62, 126.59, 110.81, 110.00, 109.07, 109.01, 108.98, 108.75, 108.24, 108.16, 96.52, 96.46, 96.41, 77.24, 73.12, 72.99, 72.85, 72.16, 71.77, 70.91, 70.89, 70.43, 70.38, 70.28, 67.47, 66.21, 65.69, 63.43, 63.34, 62.54, 59.30, 59.00, 47.27, 43.87, 36.95, 32.50, 32.21, 29.68, 29.20, 26.02, 25.98, 25.91, 24.86, 24.82, 24.44, 24.25, 15.29, 15.18. **HRMS** calculated for  $\text{C}_{24}\text{H}_{34}\text{O}_7$  ( $\text{M} + \text{Na}^+$ ): 457.2197, found: 457.2196

**2-(cinnamyloxy)tetrahydro-2H-pyran (40)**

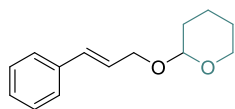

Eluent for purification: hexane: ethyl acetate = 20:1. **<sup>1</sup>H NMR** (400 MHz, Chloroform-*d*)  $\delta$  7.44 – 7.37 (m, 2H), 7.36 – 7.29 (m, 2H), 7.27 – 7.21 (m, 1H), 6.64 (dt,  $J$  = 15.9, 1.5 Hz, 1H), 6.33 (ddd,  $J$  = 15.9, 6.6, 5.6 Hz, 1H), 4.72 (dd,  $J$  = 4.2, 3.0 Hz, 1H), 4.42 (ddd,  $J$  = 12.9, 5.6, 1.6 Hz, 1H), 4.17 (ddd,  $J$  = 12.9, 6.6, 1.4 Hz, 1H), 3.93 (ddd,  $J$  = 11.3, 8.0, 3.4 Hz, 1H), 3.61 – 3.49 (m, 1H), 1.94 – 1.82 (m, 1H), 1.81 – 1.71 (m, 1H), 1.67 – 1.51 (m, 4H). **<sup>13</sup>C NMR** (101 MHz, Chloroform-*d*)  $\delta$  136.81, 132.30, 128.50, 127.59, 126.48, 126.01, 97.86, 67.63, 62.24, 30.64, 25.48, 19.48. **HRMS** calculated for C<sub>14</sub>H<sub>18</sub>O<sub>2</sub> (M + Na<sup>+</sup>): 241.1199, found: 241.1197.

#### 5-(3-((tetrahydro-2H-pyran-2-yl)oxy)prop-1-yn-1-yl)benzofuran

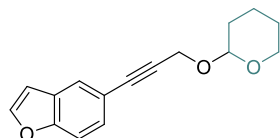

Eluent for purification: hexane: ethyl acetate = 20:1. Colorless oil (6 mg, 23% yield). **<sup>1</sup>H NMR** (500 MHz, Chloroform-*d*)  $\delta$  7.73 (d,  $J$  = 1.5 Hz, 1H), 7.64 (d,  $J$  = 2.2 Hz, 1H), 7.48 – 7.37 (m, 2H), 6.75 (d,  $J$  = 2.1 Hz, 1H), 4.94 (t,  $J$  = 3.5 Hz, 1H), 4.61 – 4.43 (m, 2H), 3.92 (ddd,  $J$  = 11.6, 9.0, 3.0 Hz, 1H), 3.59 (dtd,  $J$  = 11.0, 4.3, 1.6 Hz, 1H), 1.93 – 1.83 (m, 1H), 1.79 (tt,  $J$  = 10.2, 3.4 Hz, 1H), 1.72 – 1.57 (m, 4H). **<sup>13</sup>C NMR** (126 MHz, Chloroform-*d*)  $\delta$  154.65, 145.83, 128.28, 127.50, 125.09, 117.30, 111.47, 106.50, 96.89, 86.13, 83.70, 62.08, 54.90, 30.37, 25.45, 19.14. **HRMS** calculated for C<sub>16</sub>H<sub>16</sub>O<sub>3</sub> (M + Na<sup>+</sup>): 279.0992, found: 279.0993.

(1)

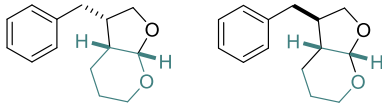

7.311  
7.307  
7.296  
7.292  
7.281  
7.277  
7.268  
7.228  
7.226  
7.212  
7.196  
7.183  
7.180  
7.175  
7.172  
7.166  
7.158  
5.288  
5.285  
5.046  
5.039  
4.197  
4.181  
4.161  
3.997  
3.891  
3.876  
3.870  
3.865  
3.803  
3.787  
3.784  
3.768  
3.666  
3.650  
3.634  
3.452  
3.447  
3.430  
3.425  
3.402  
2.885  
2.875  
2.868  
2.848  
2.734  
2.661  
2.643  
2.628  
2.617  
2.594  
2.584  
2.577  
2.559  
1.866  
1.860  
1.801  
1.787  
1.776  
1.765  
1.723  
1.720  
1.713  
1.709  
1.691  
1.687  
1.683  
1.619  
1.568  
1.549  
1.352  
1.327

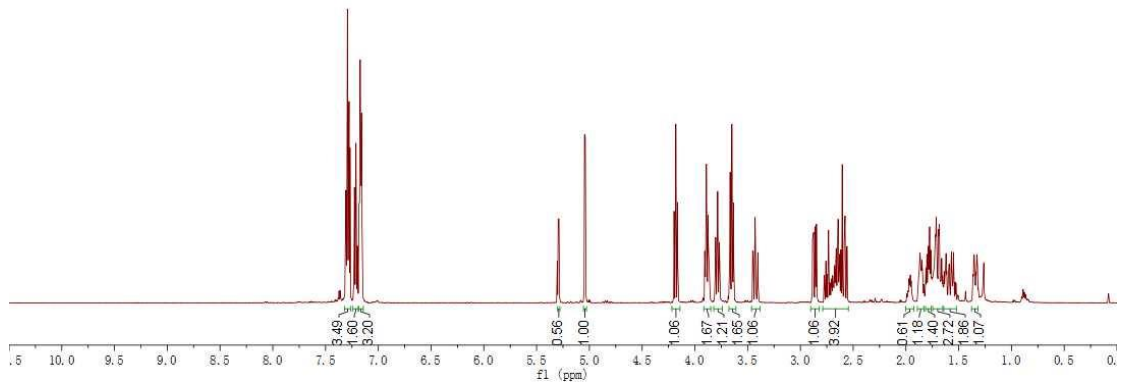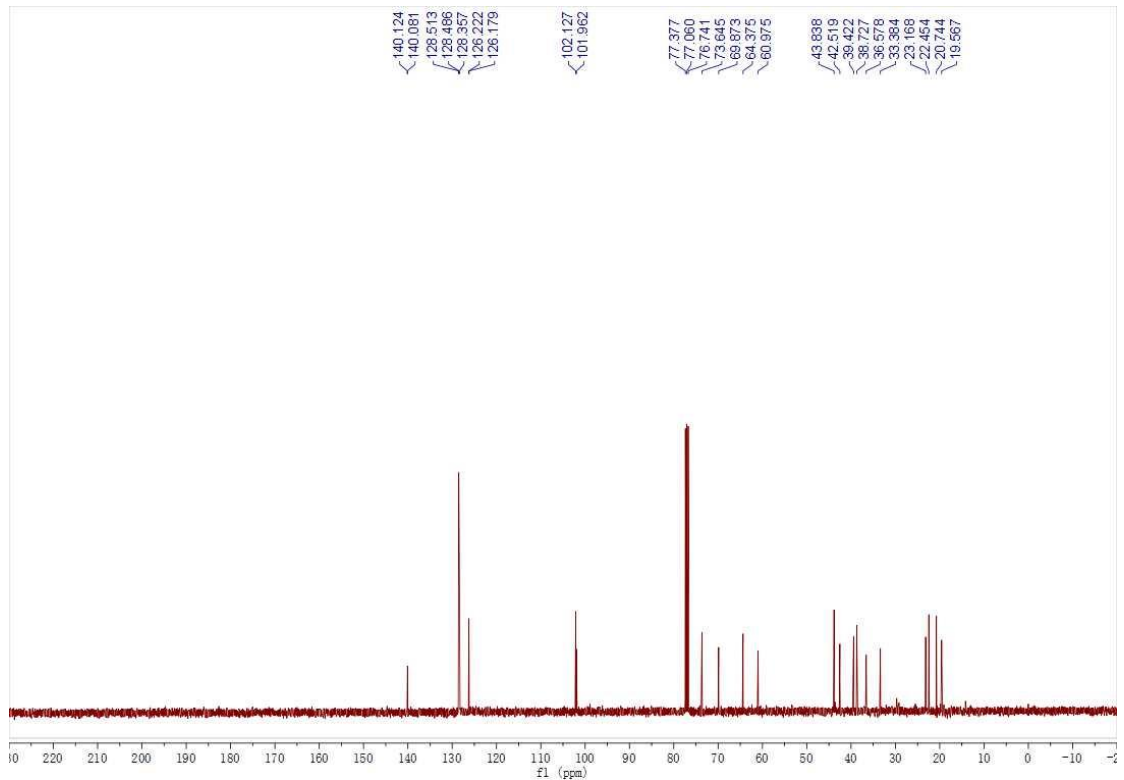

(2)

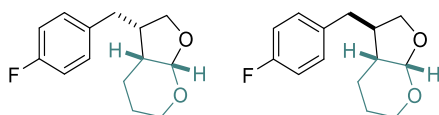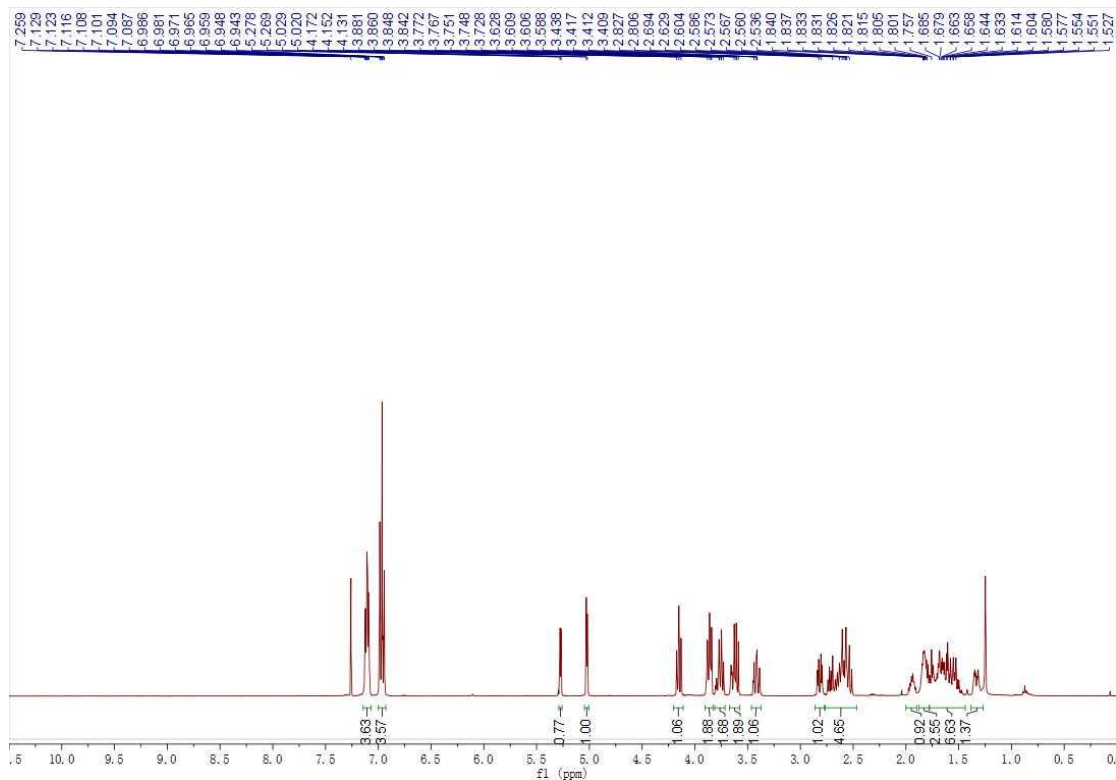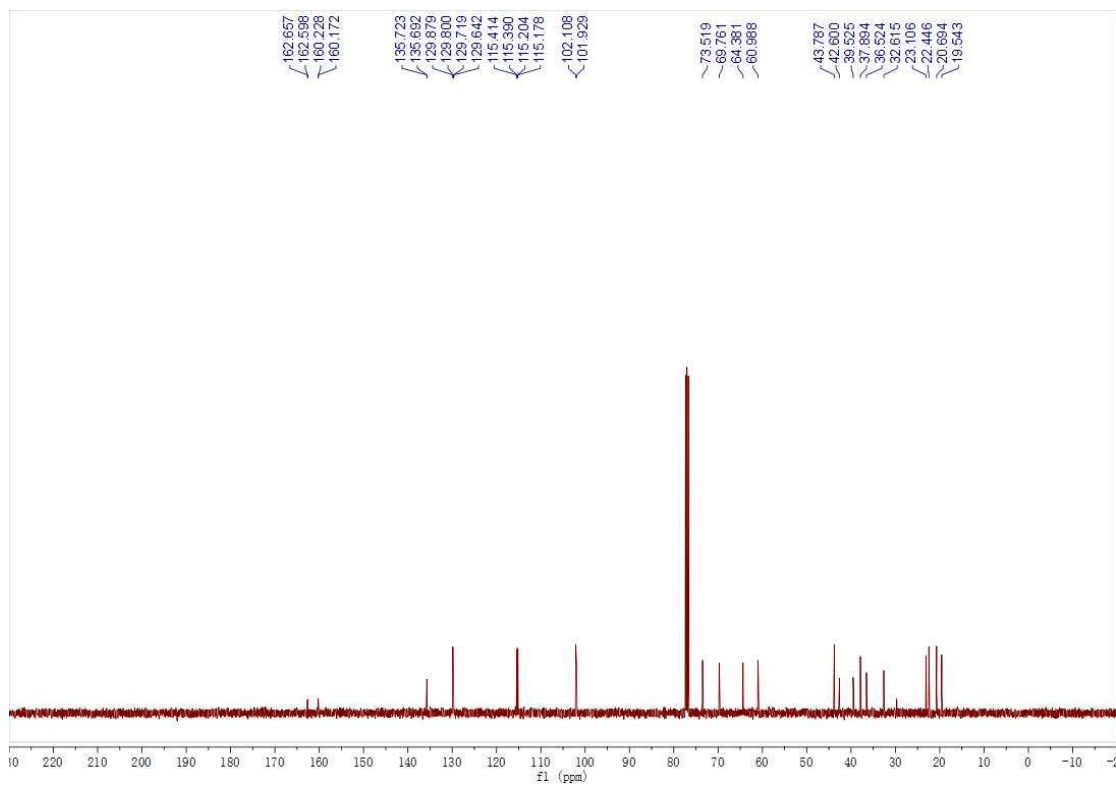



(3)

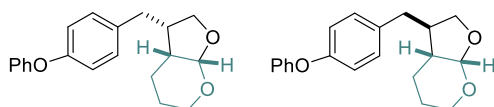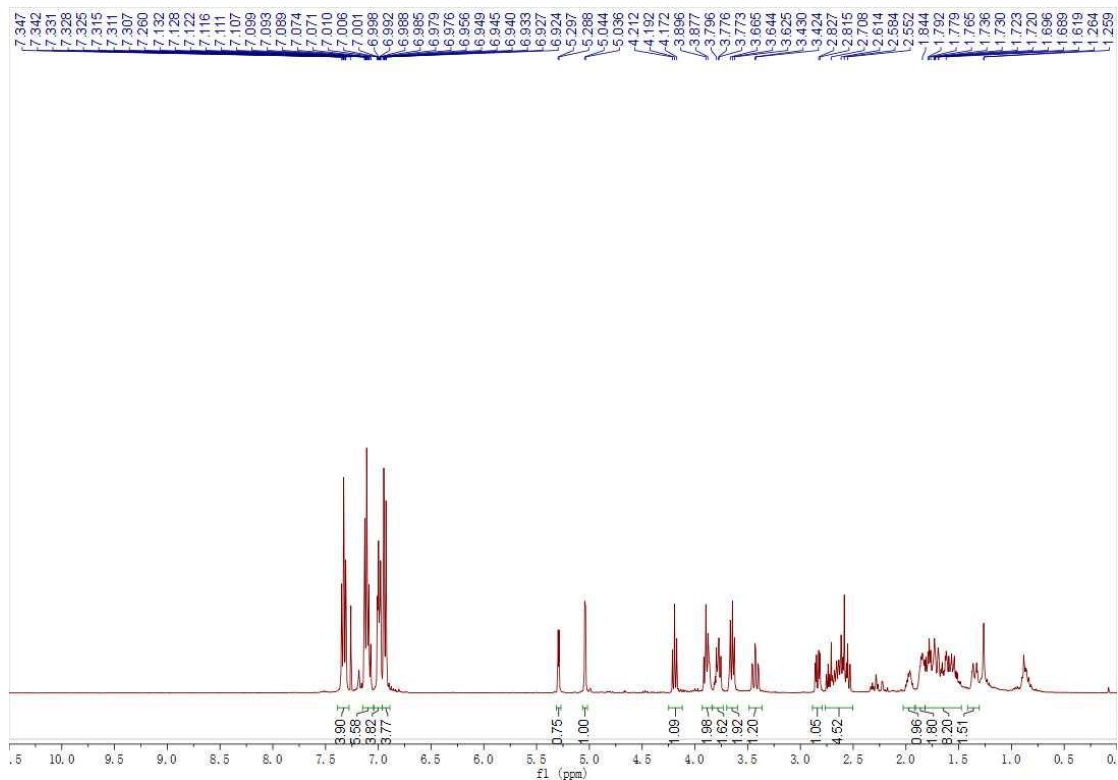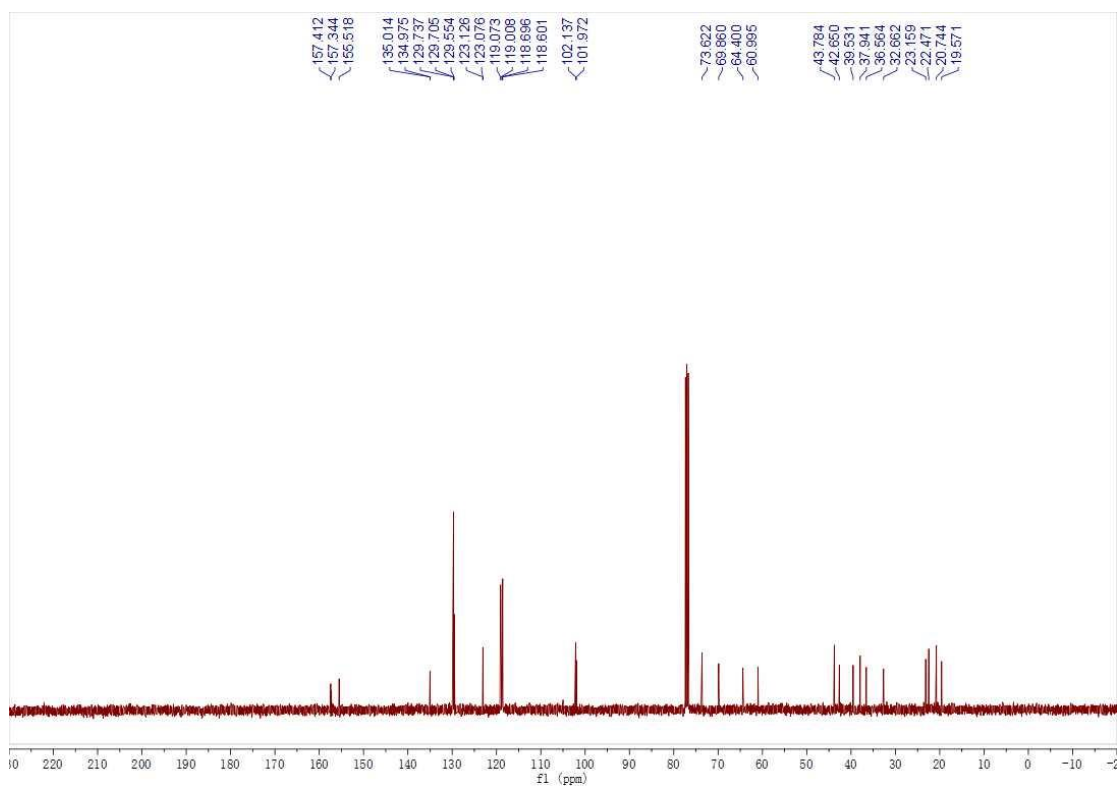

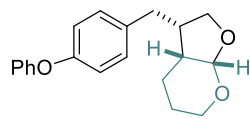

cis-syn

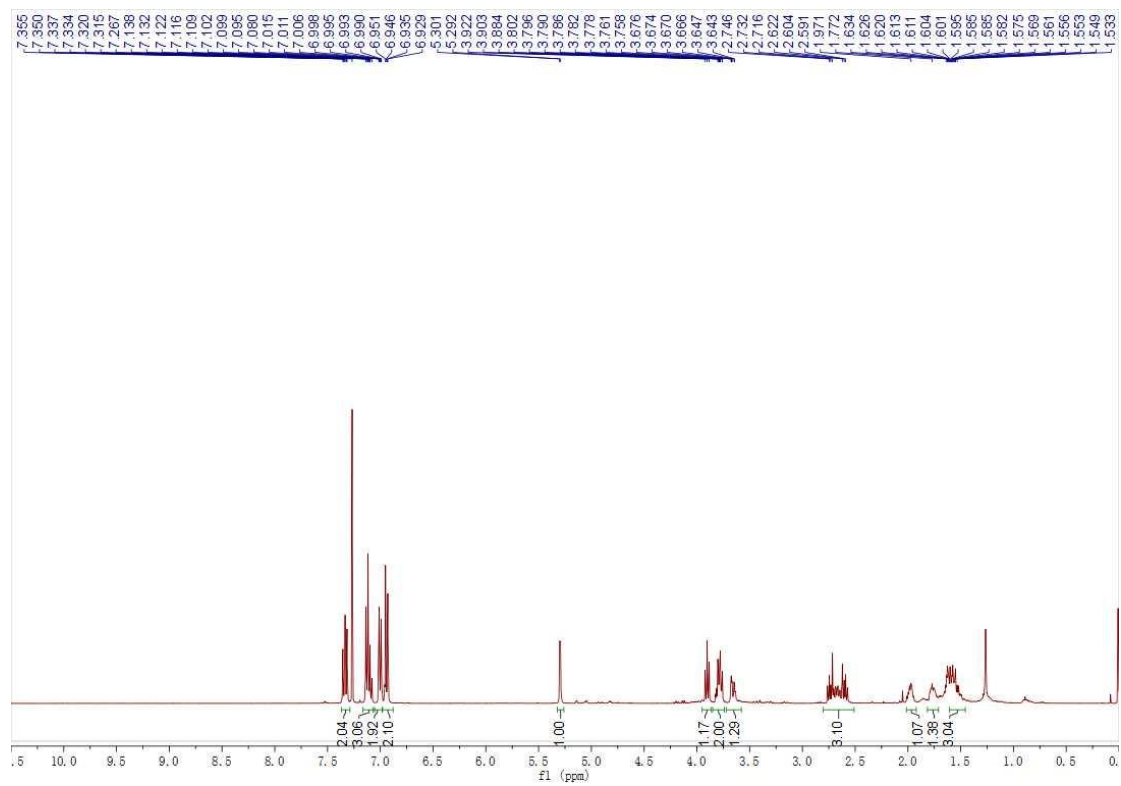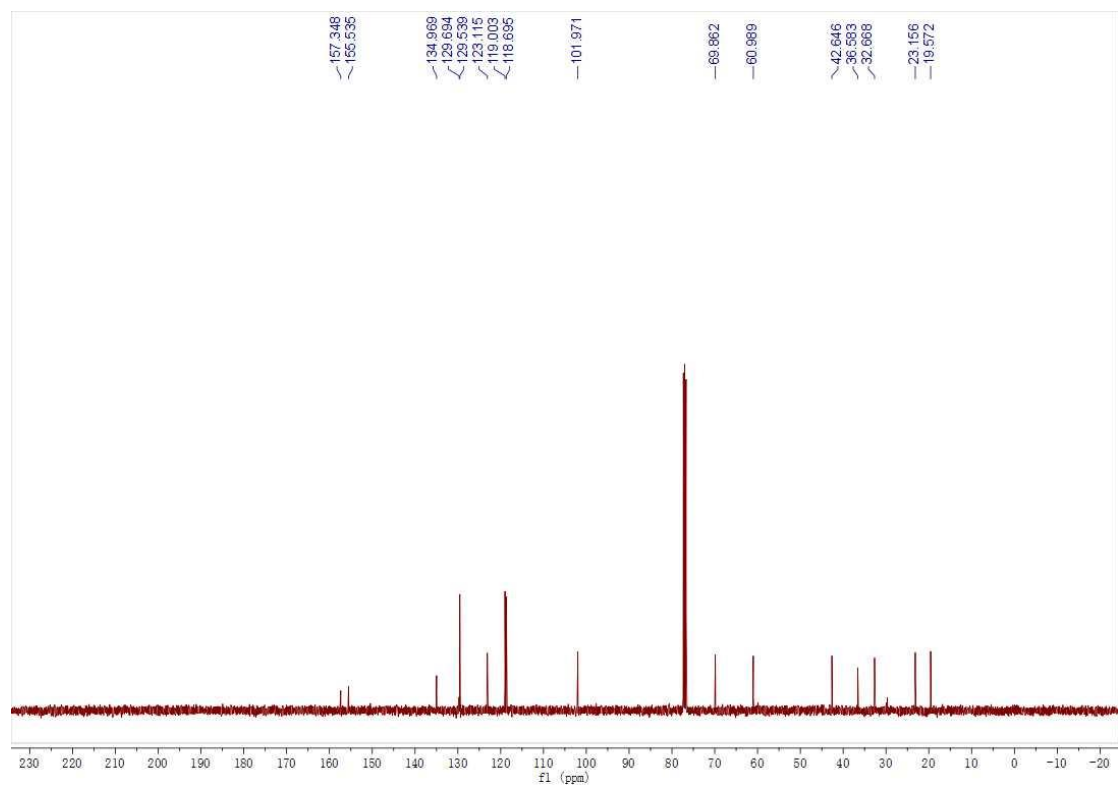

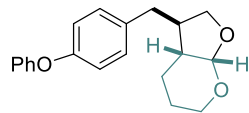

cis-anti

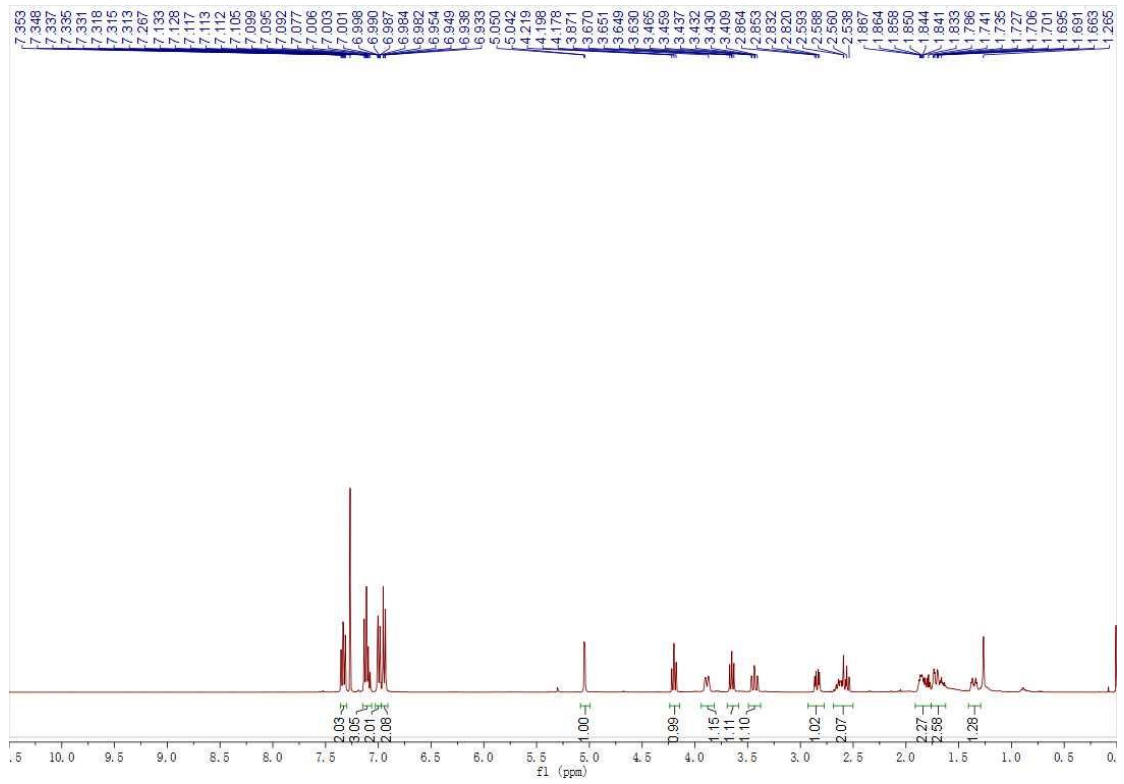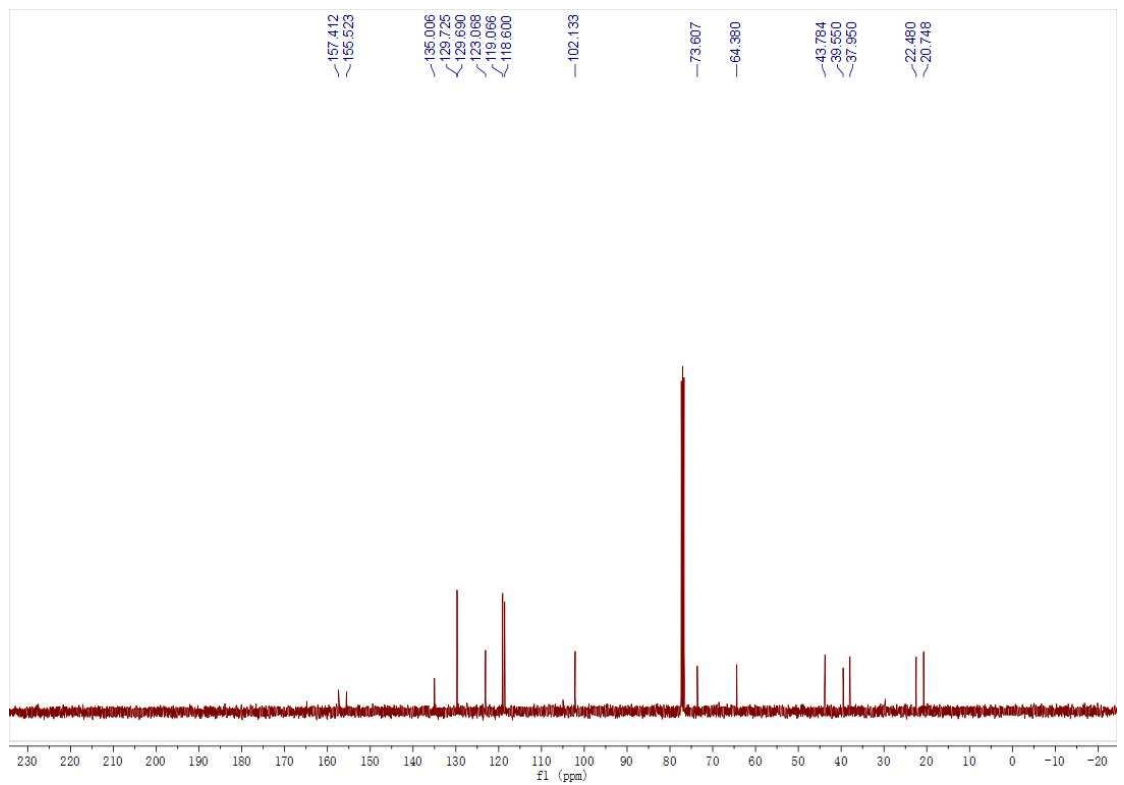

(4)

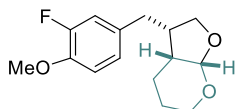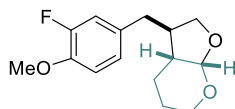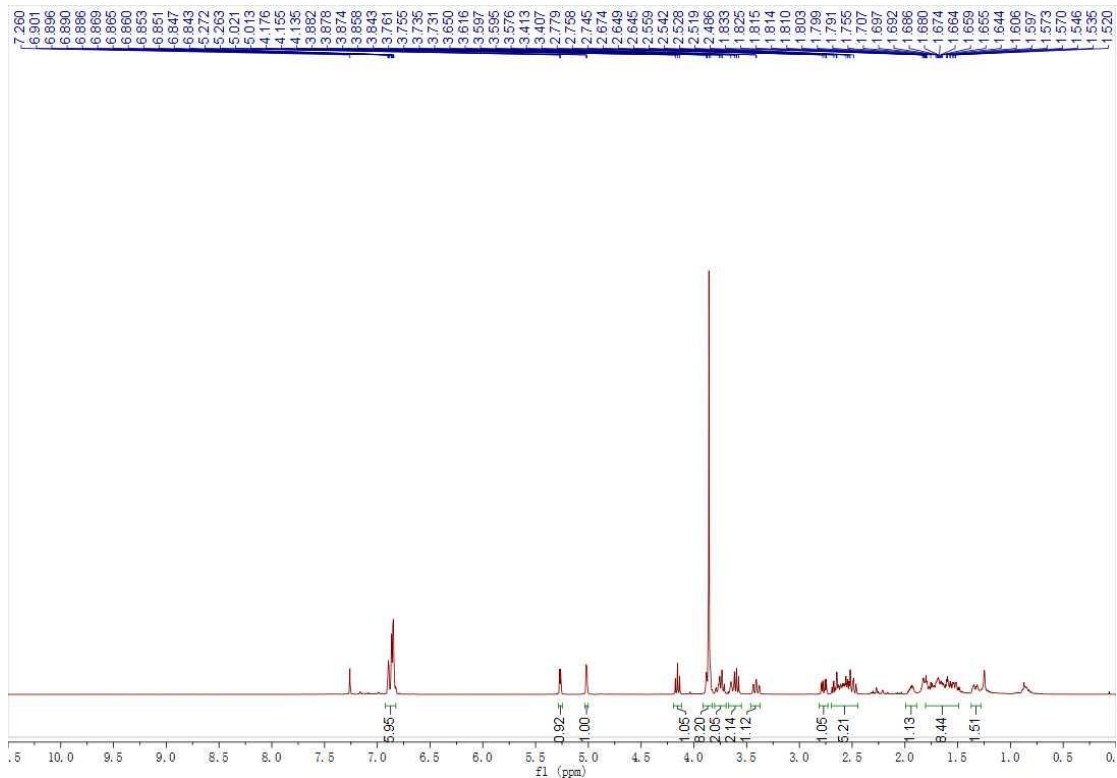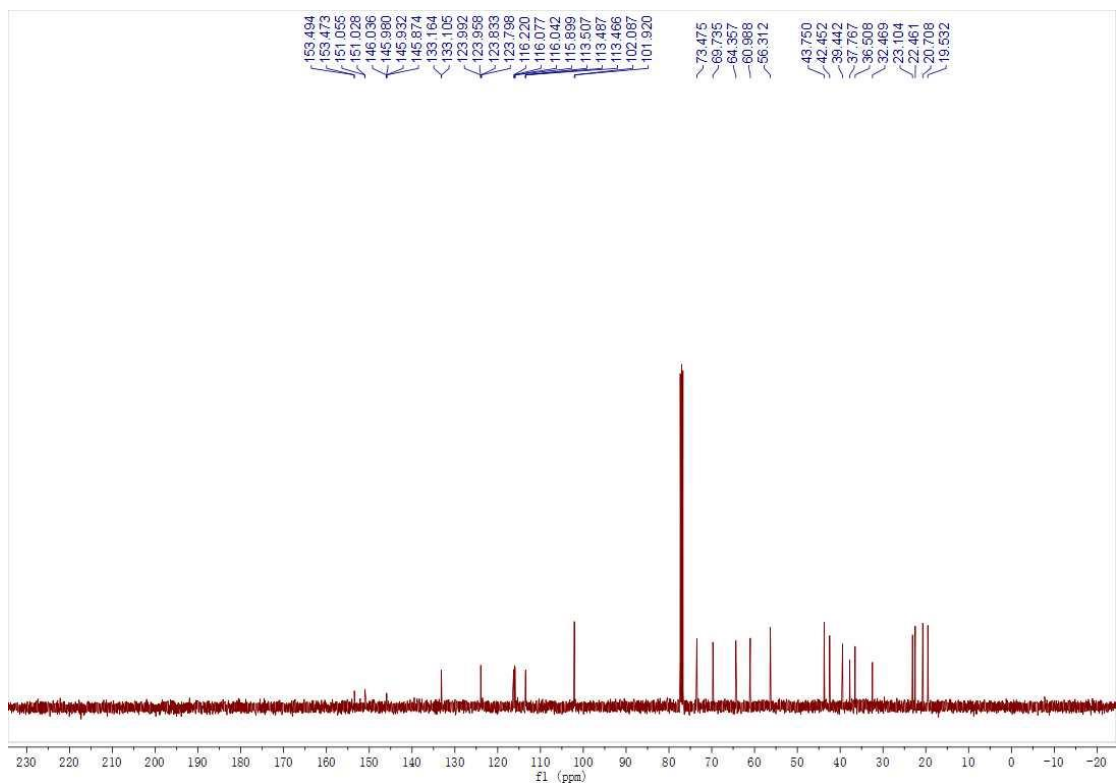

(5)

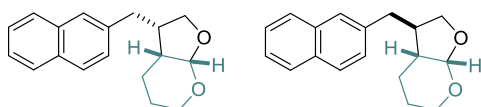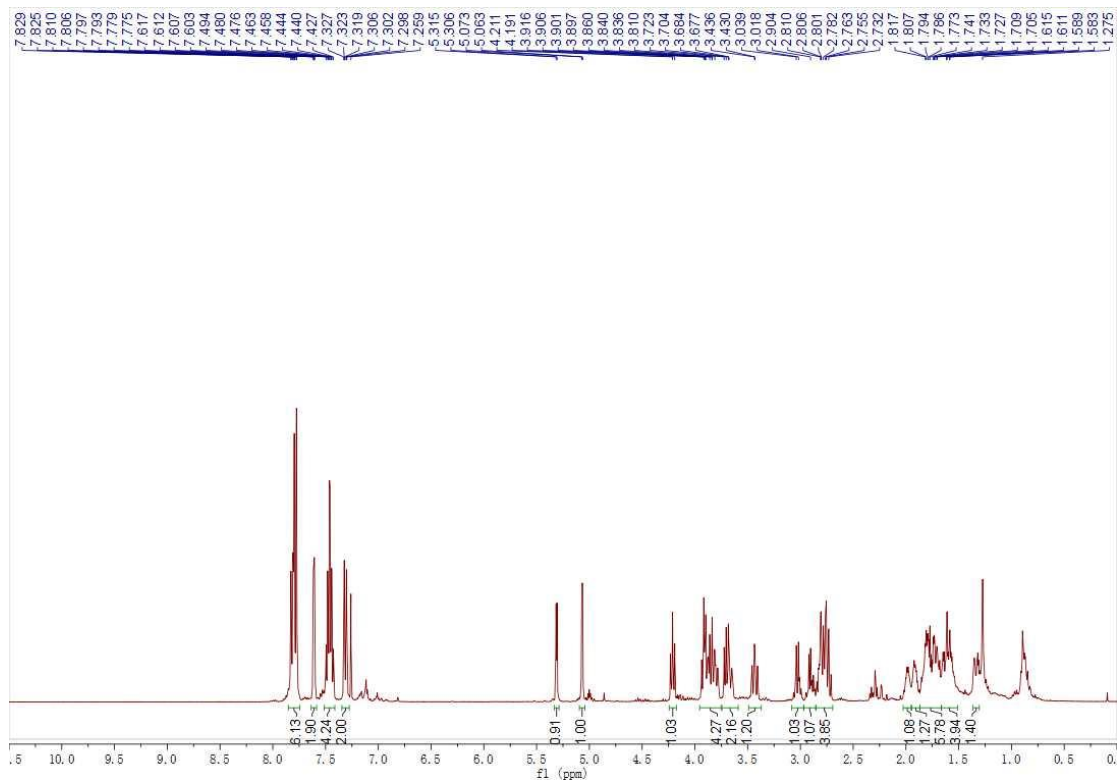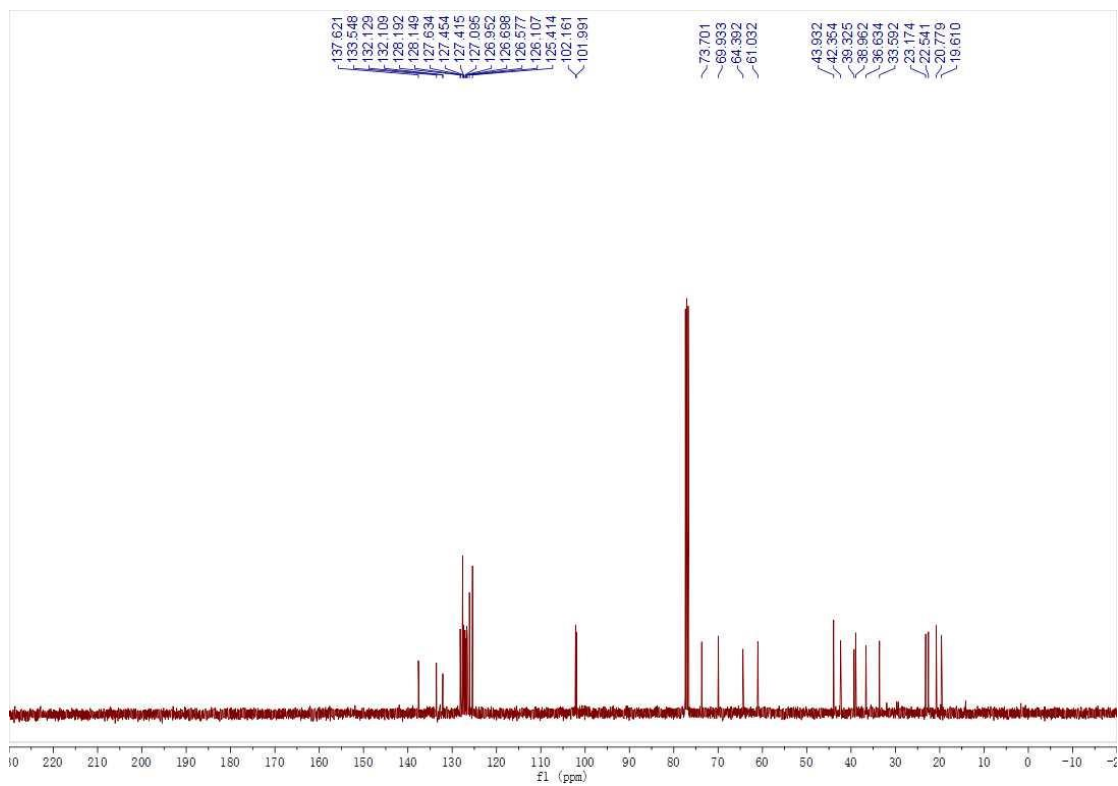

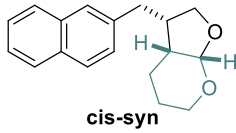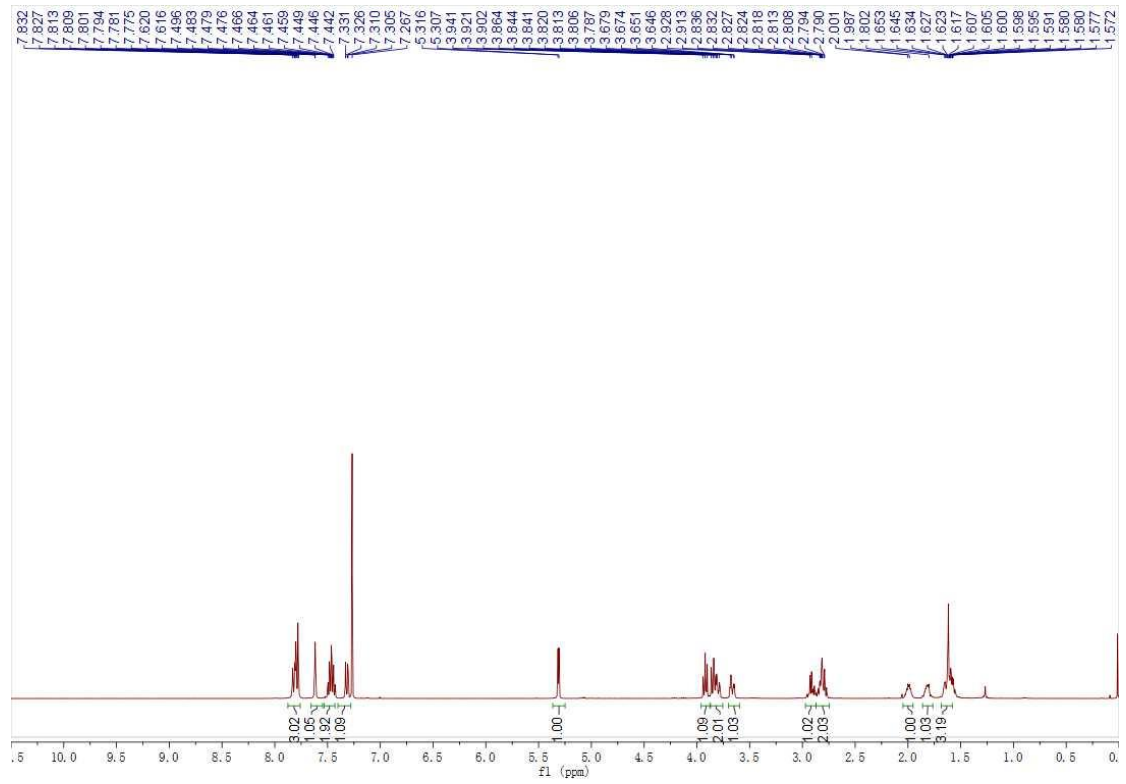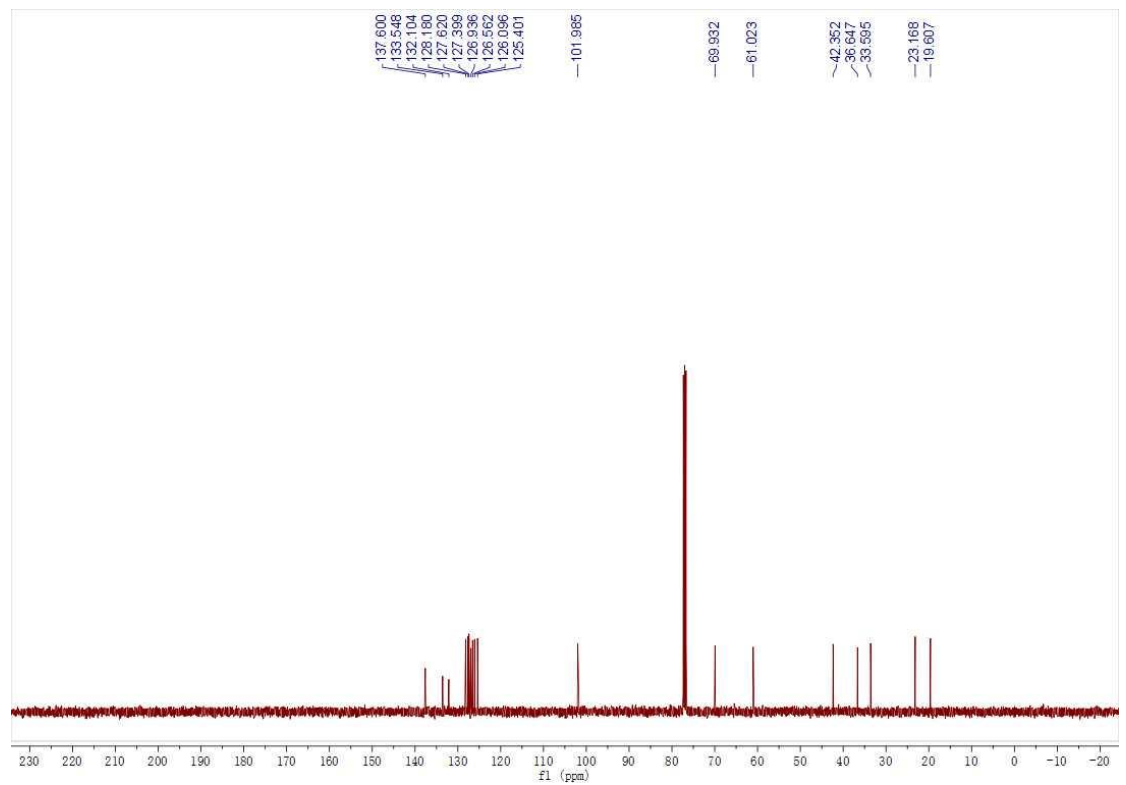

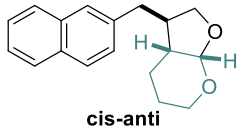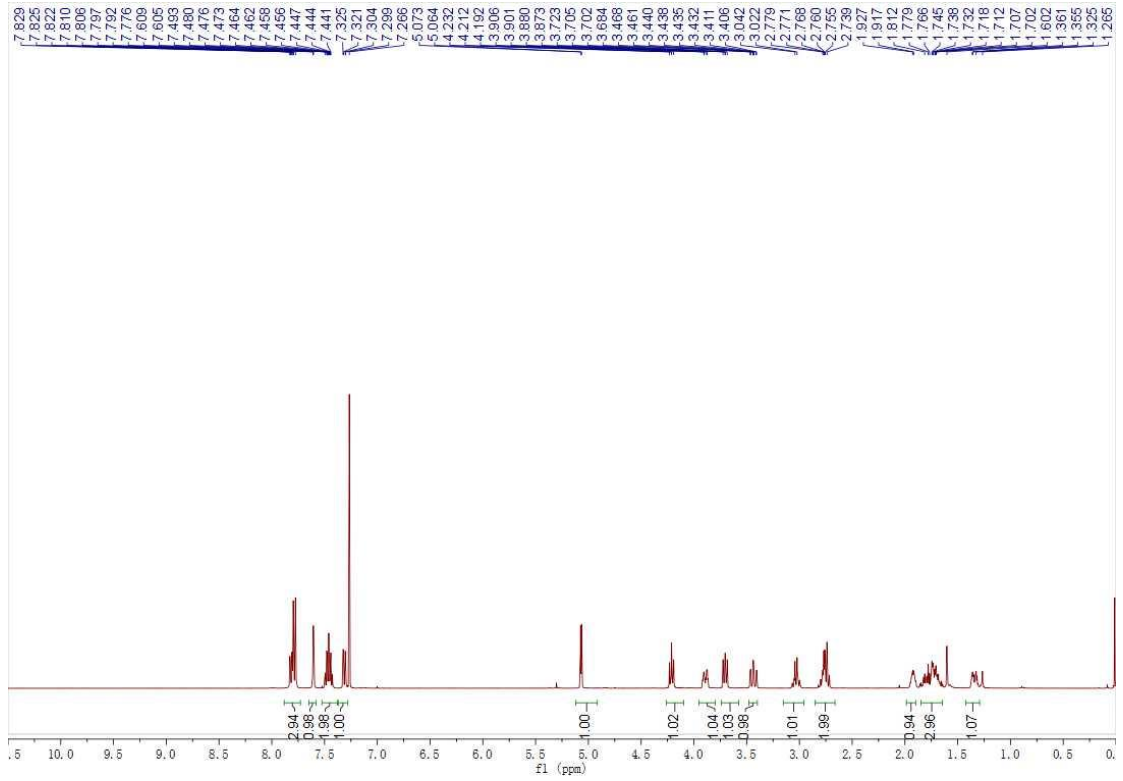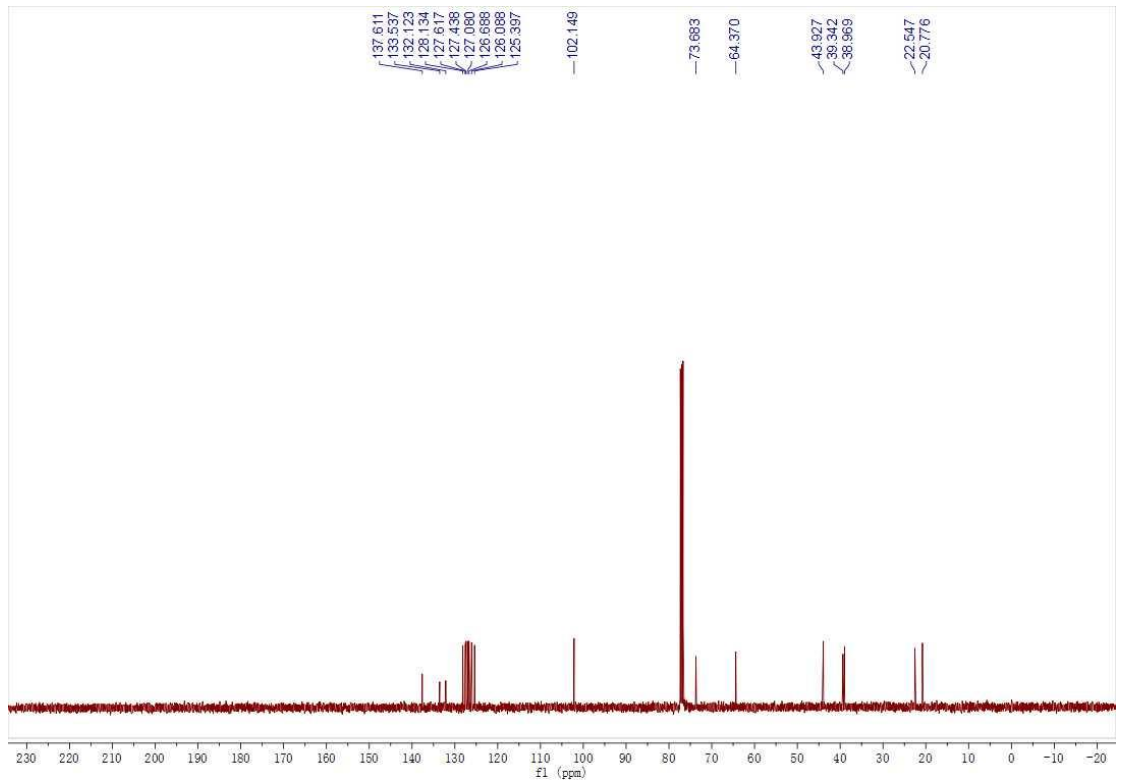

(6)

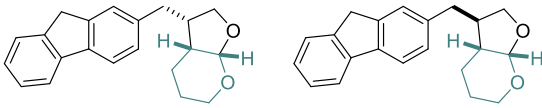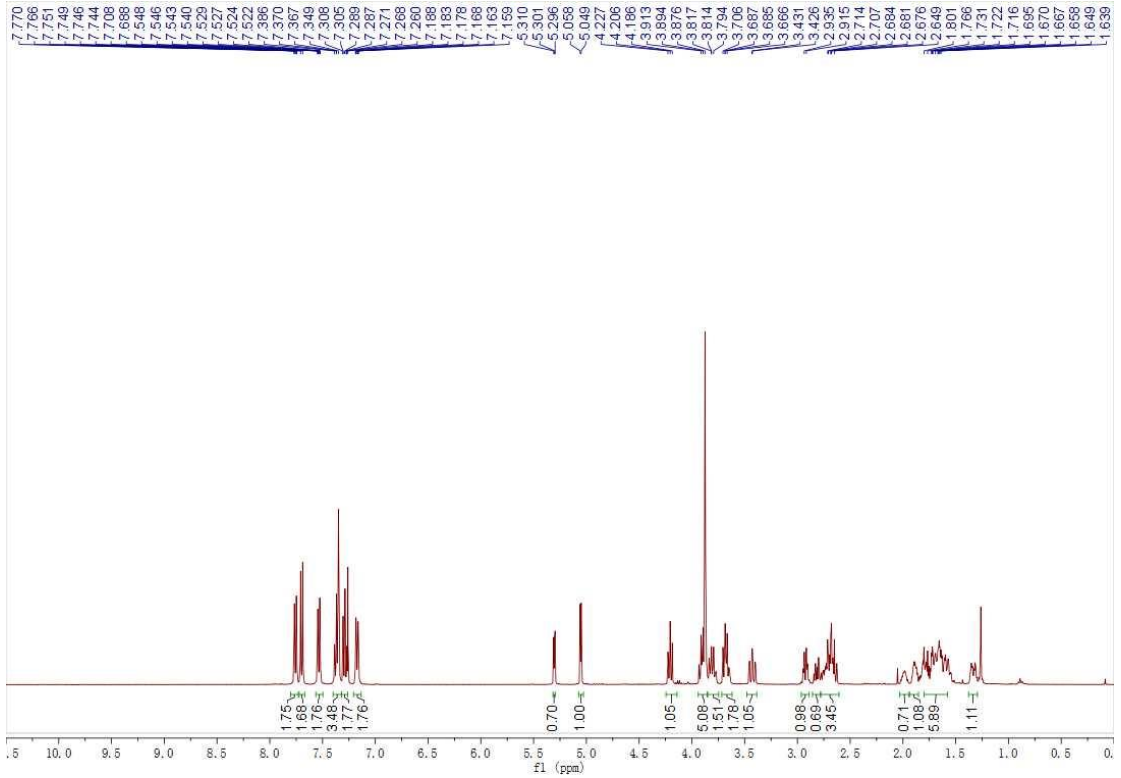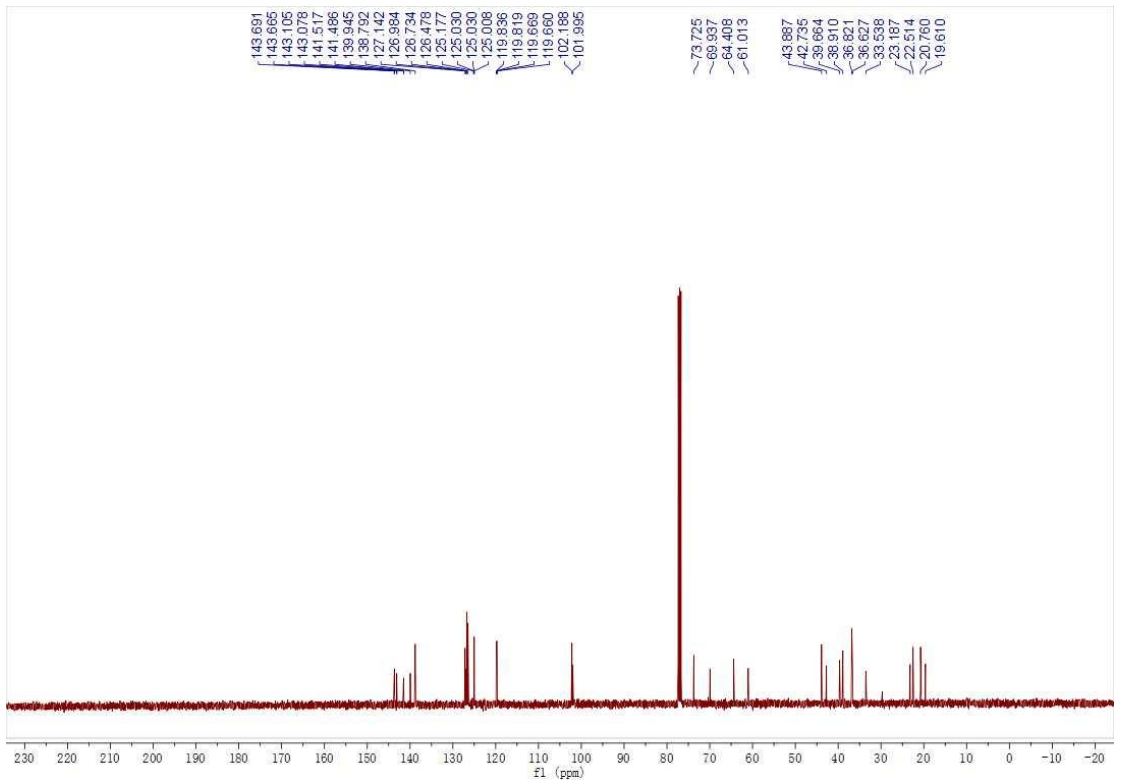



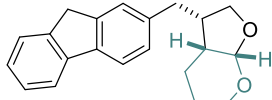

**cis-syn**

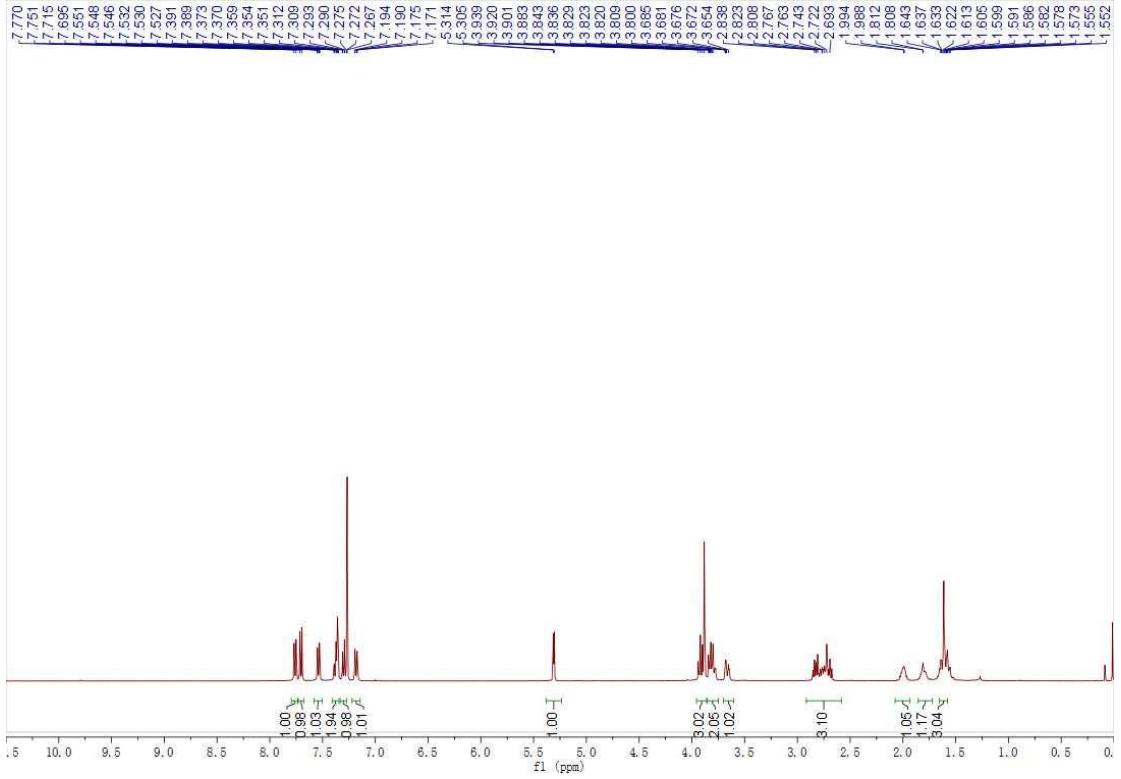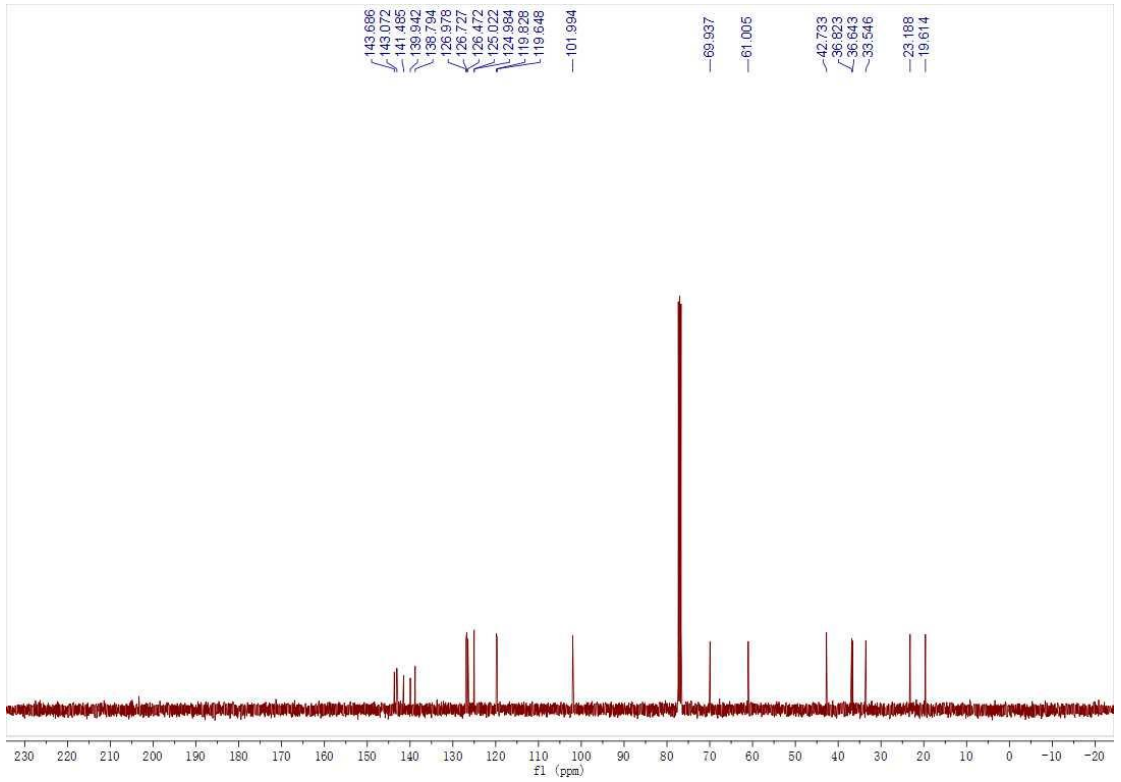

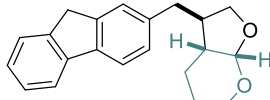

cis-anti

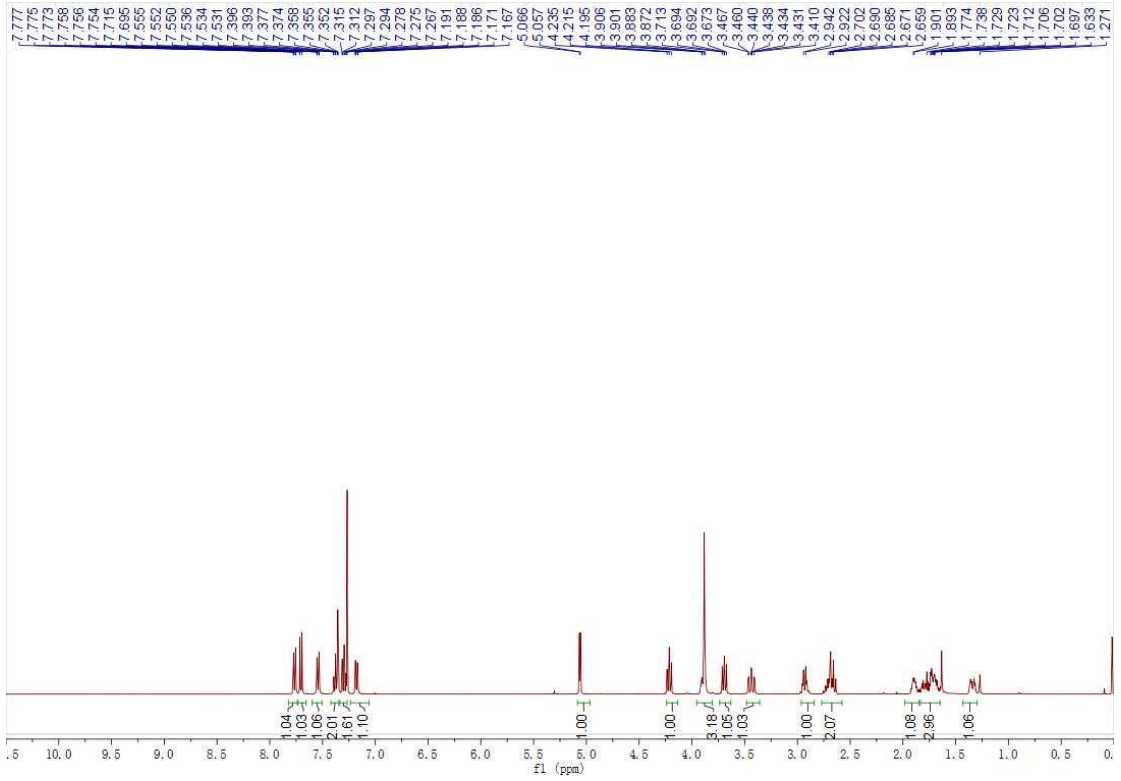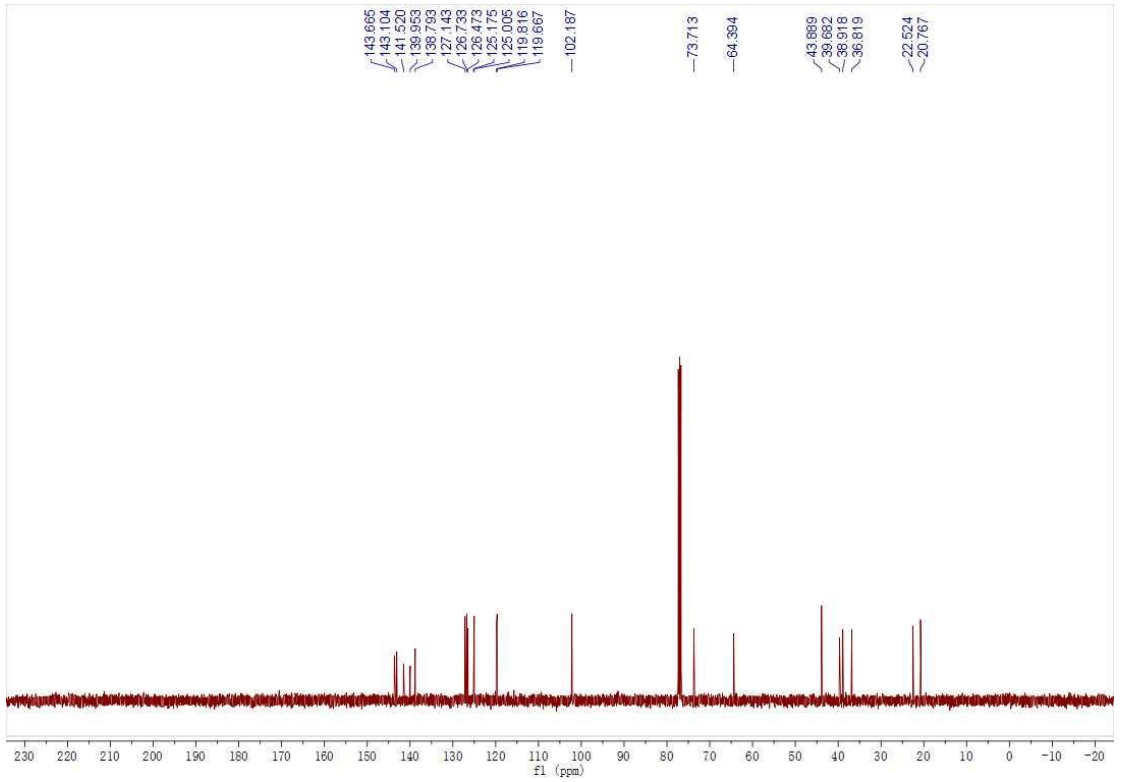

(7)

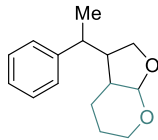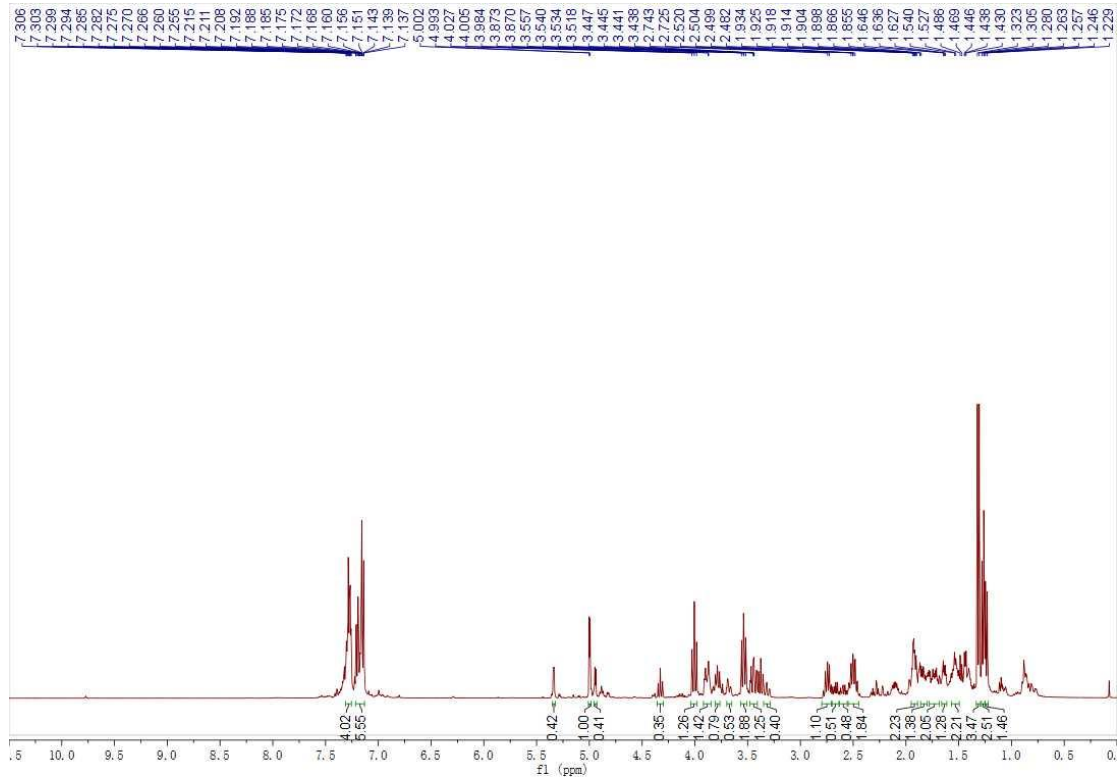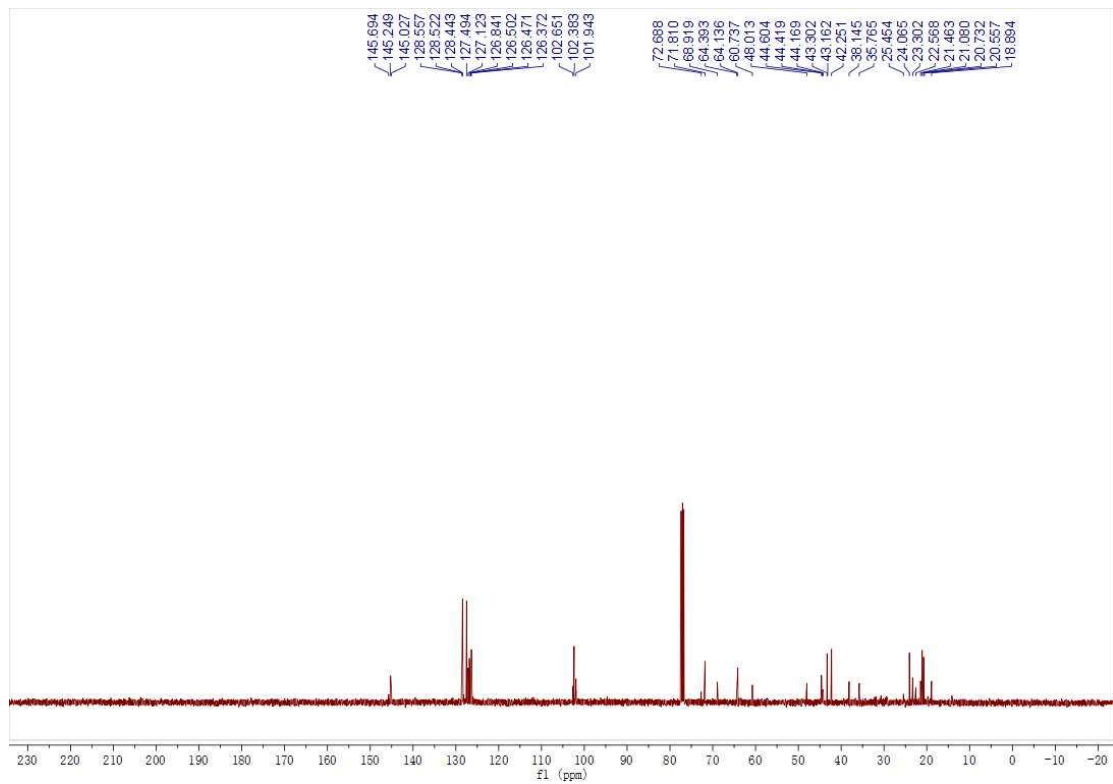

(8)

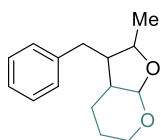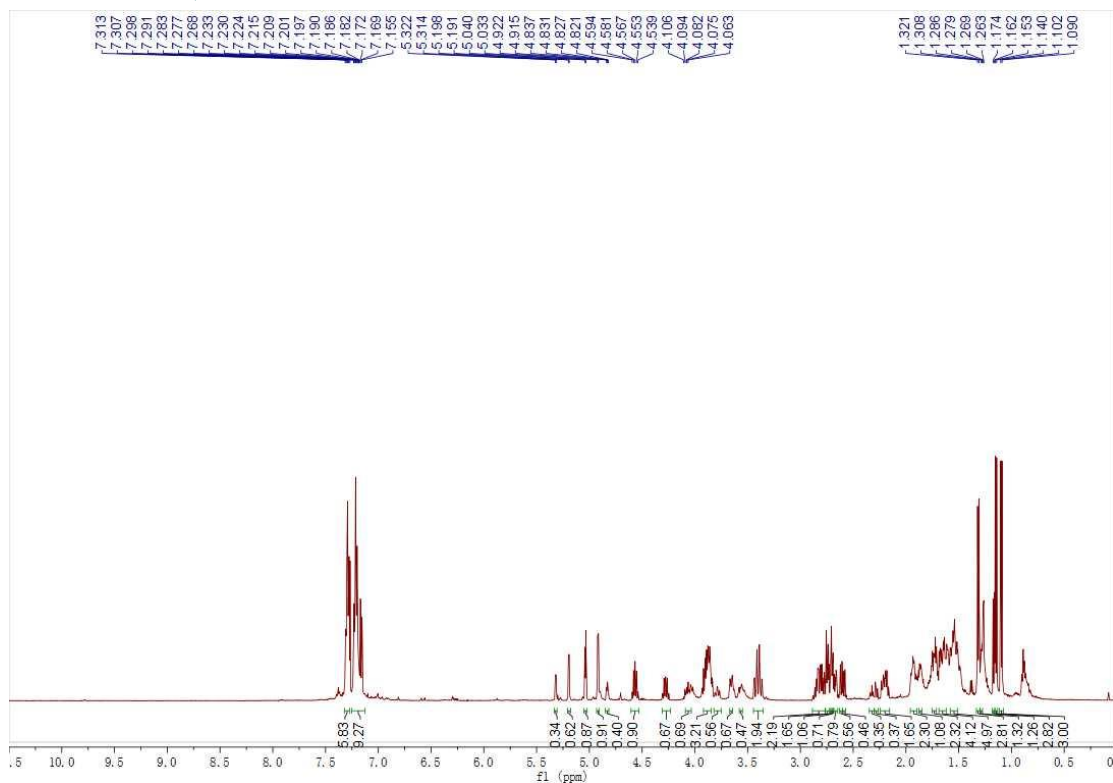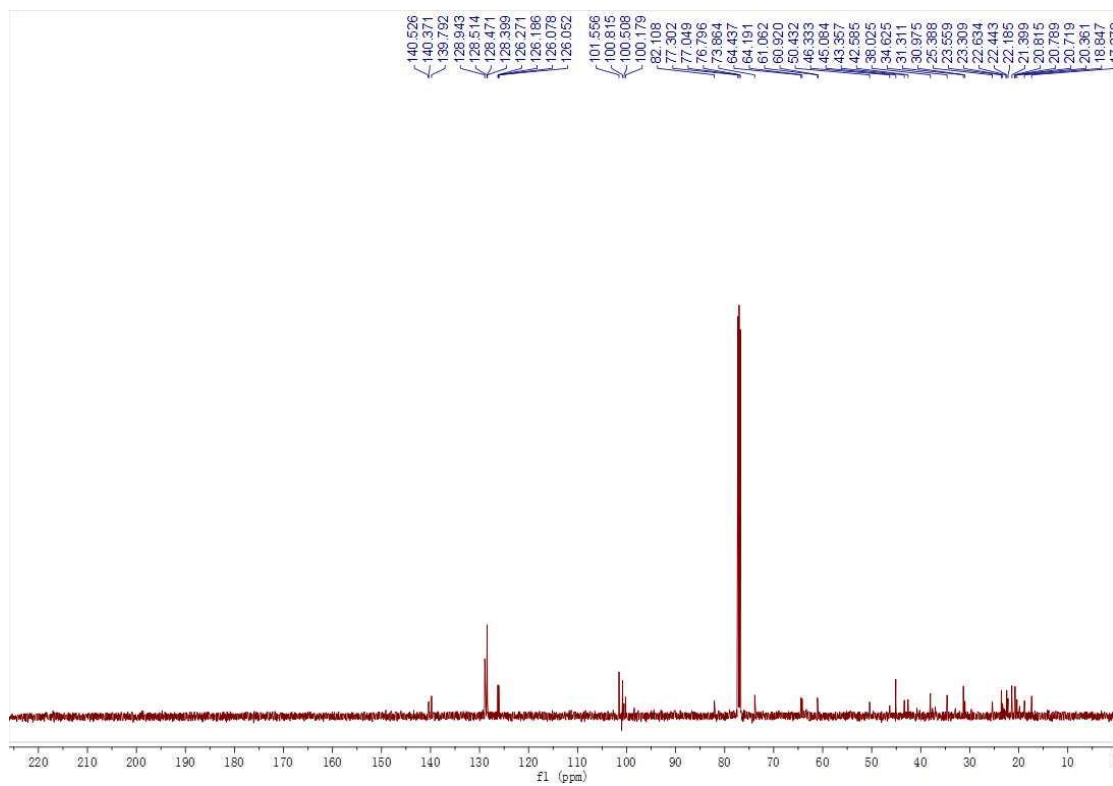

(9)

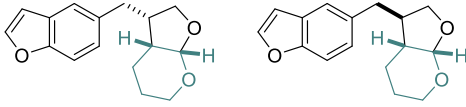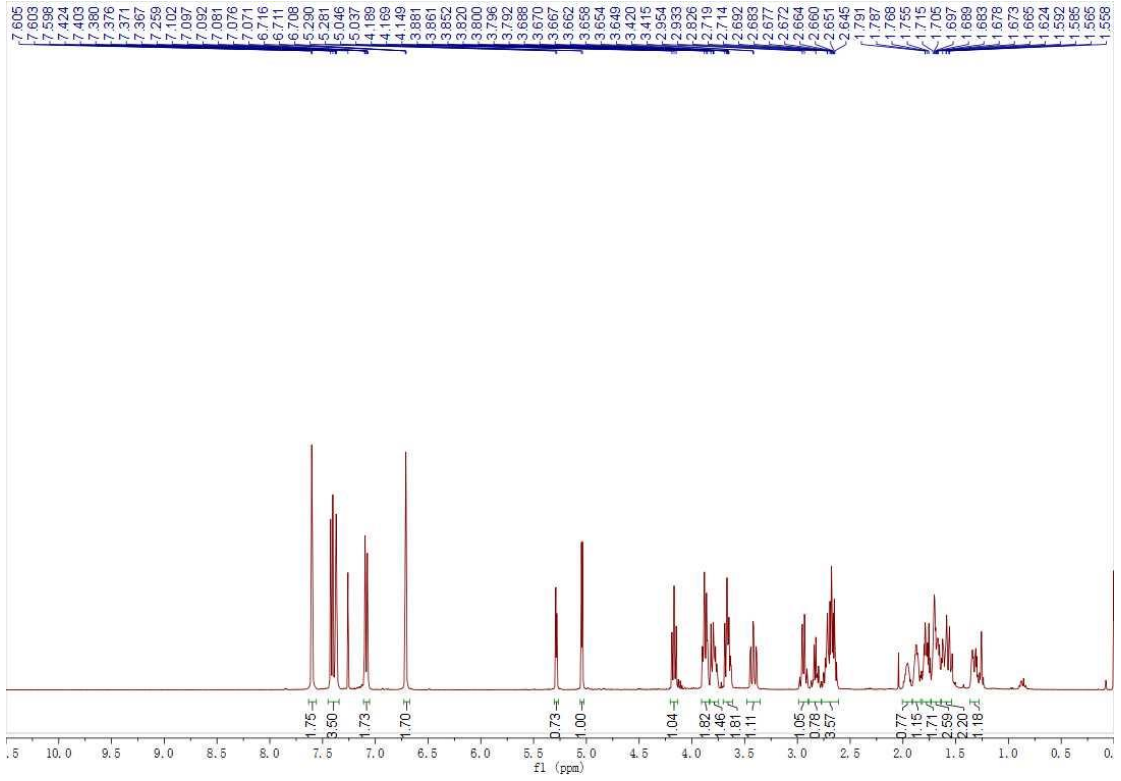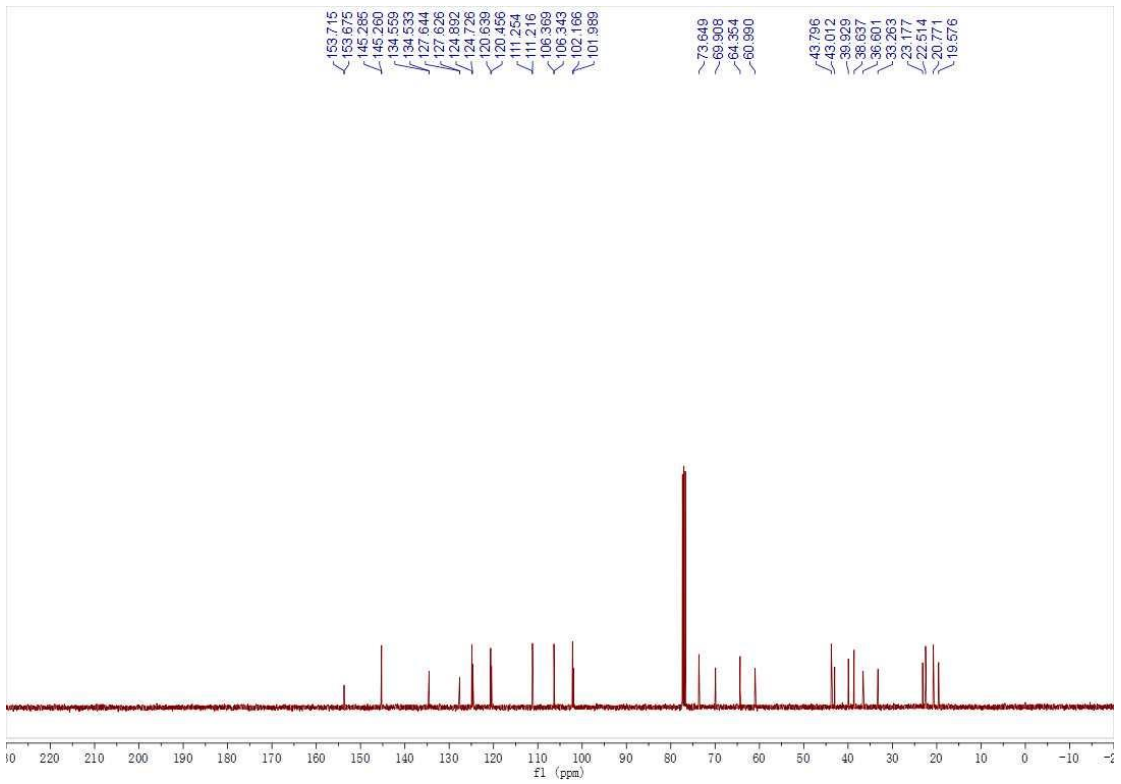

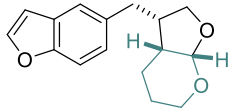

cis-syn

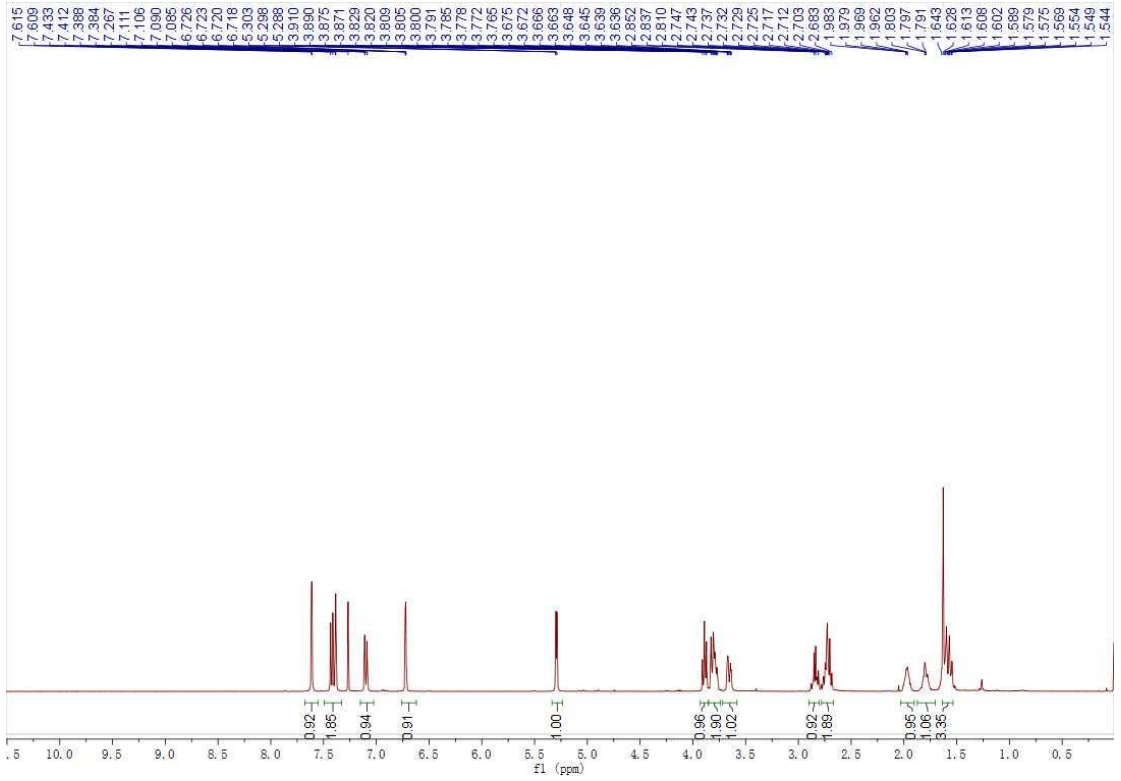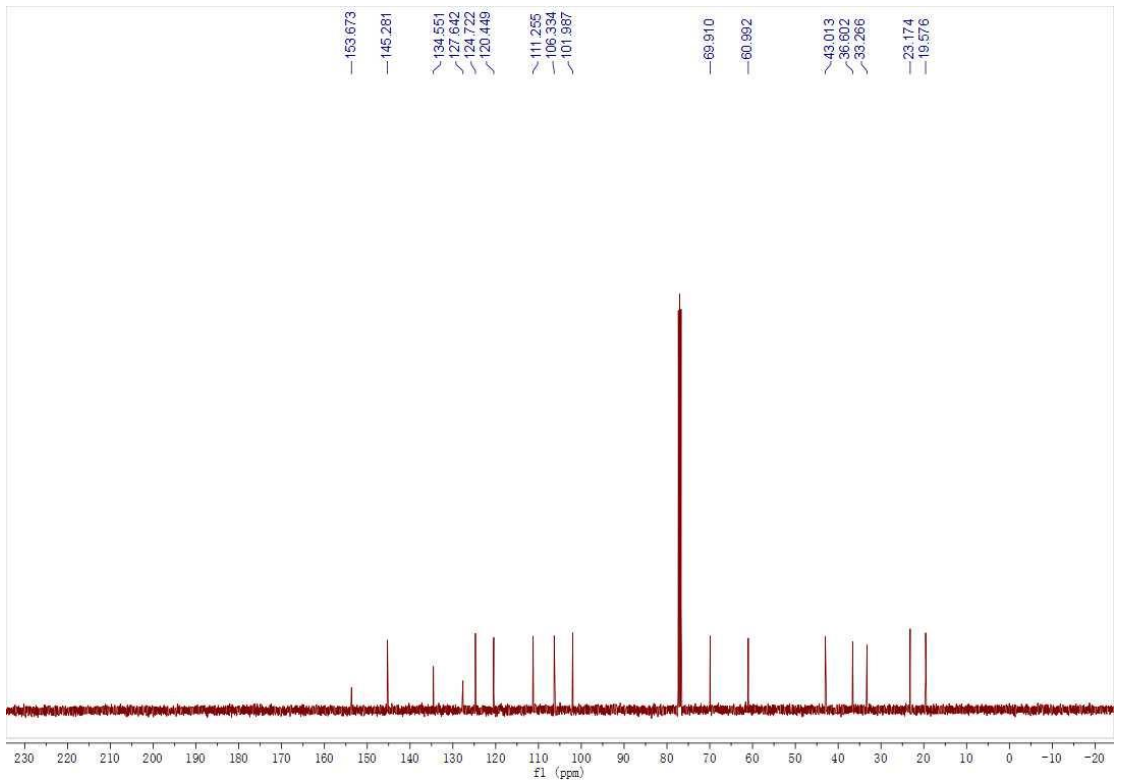

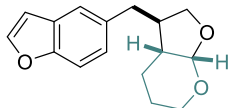

cis-anti

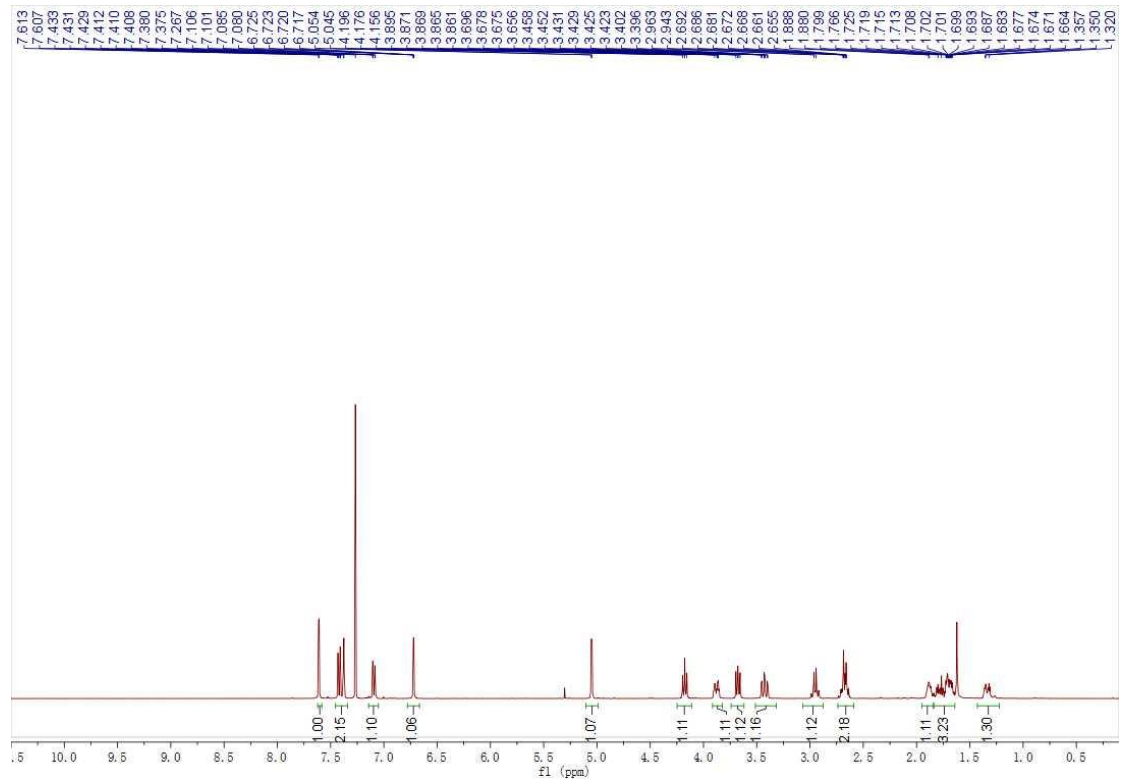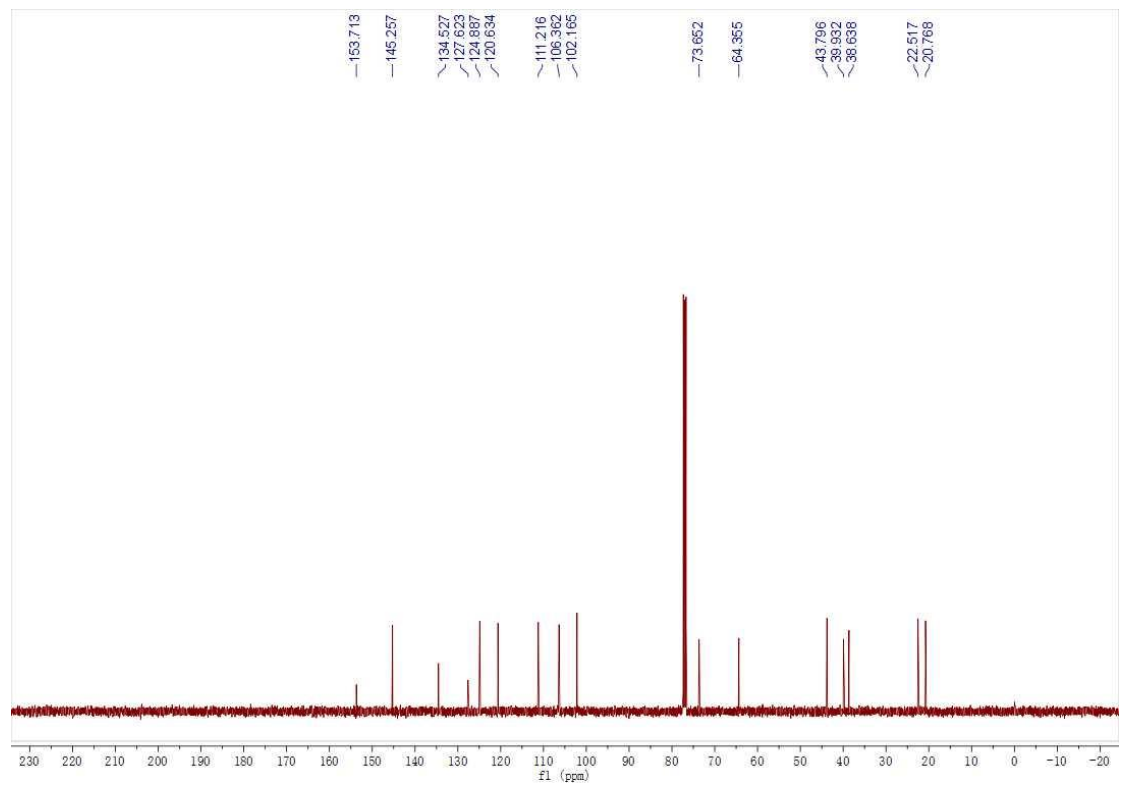

(10)

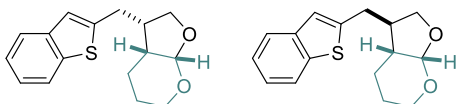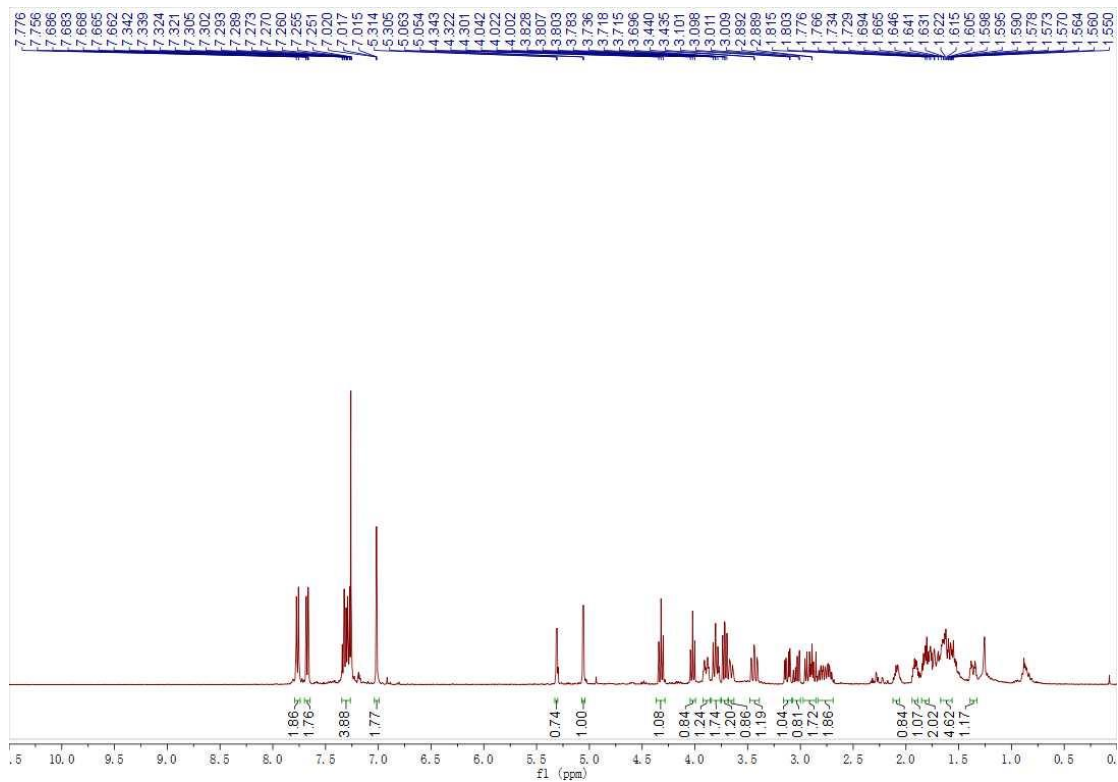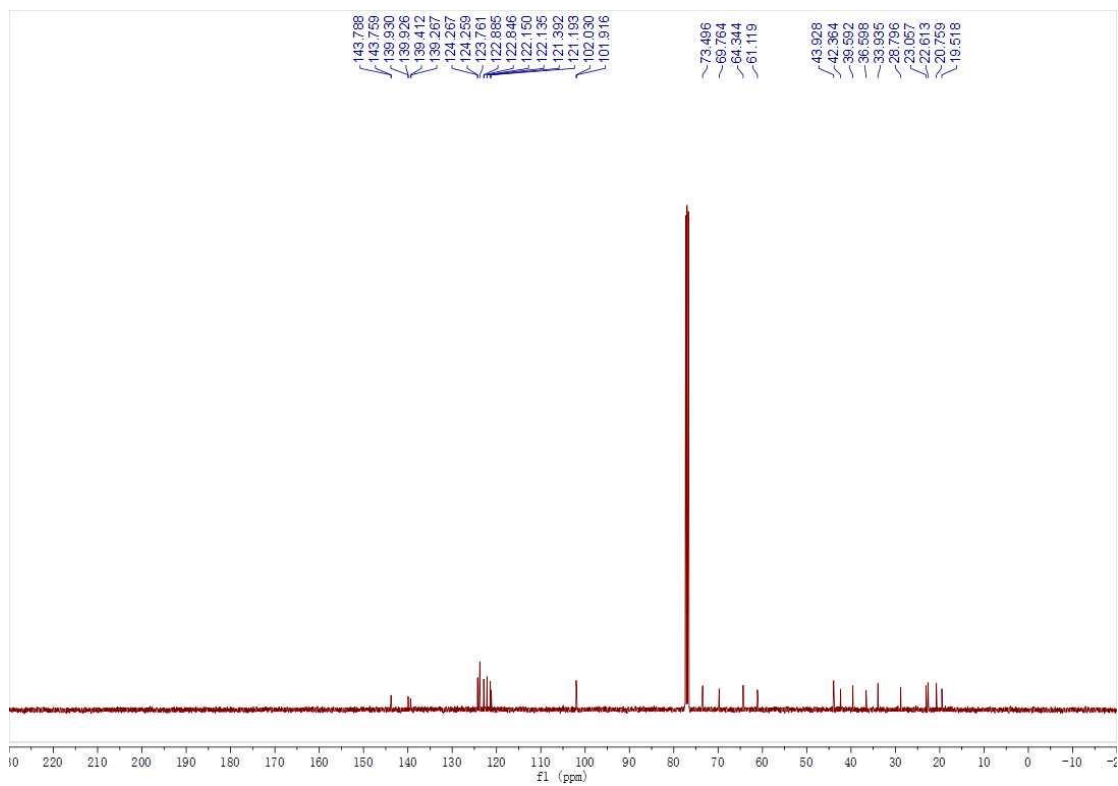



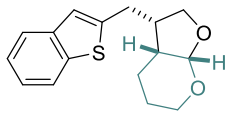

cis-syn

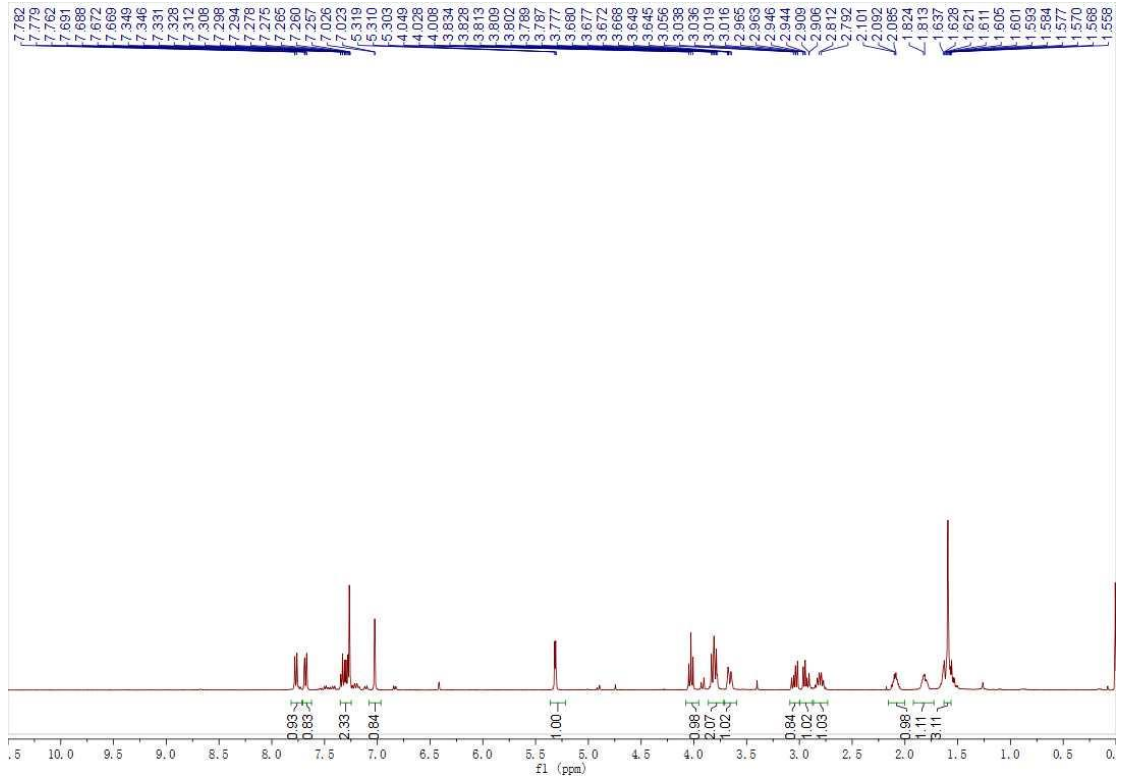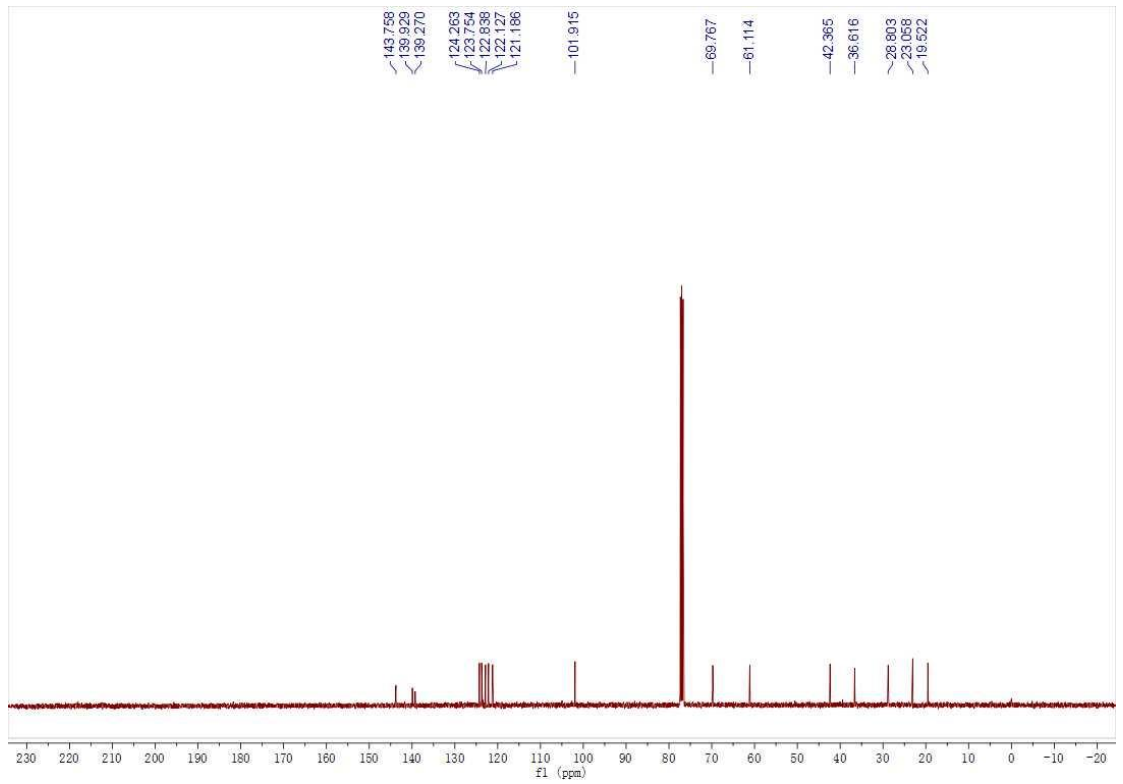

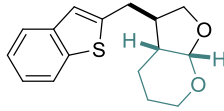

cis-anti

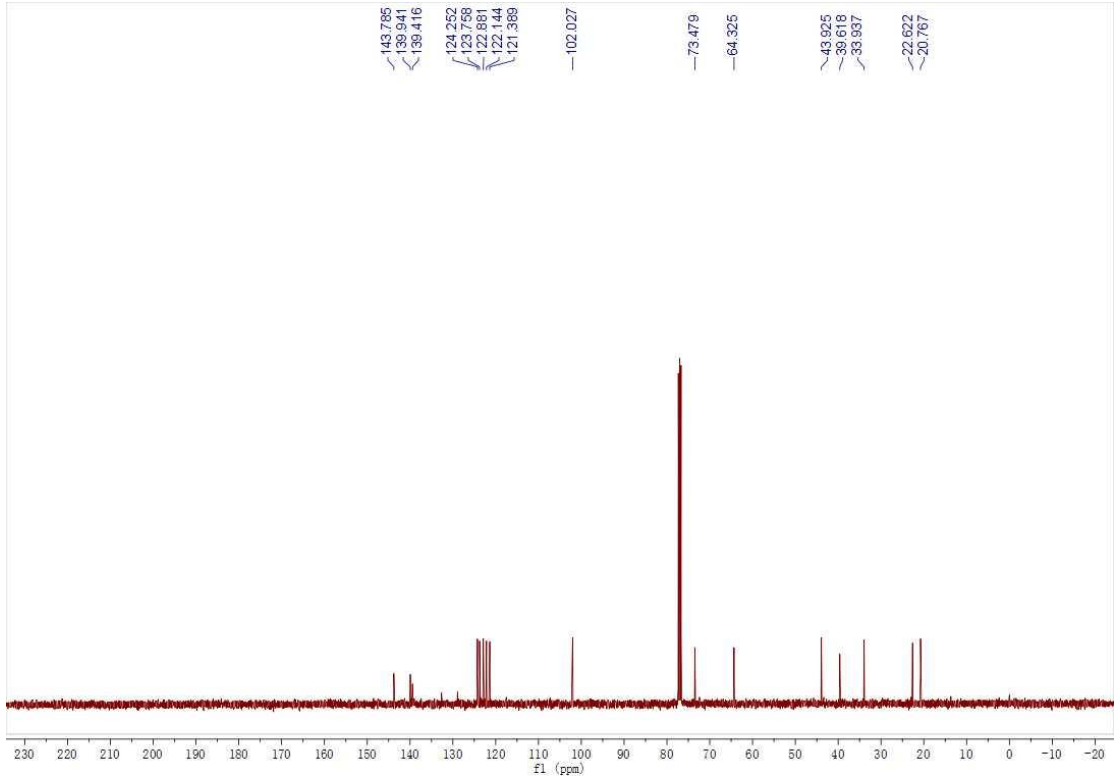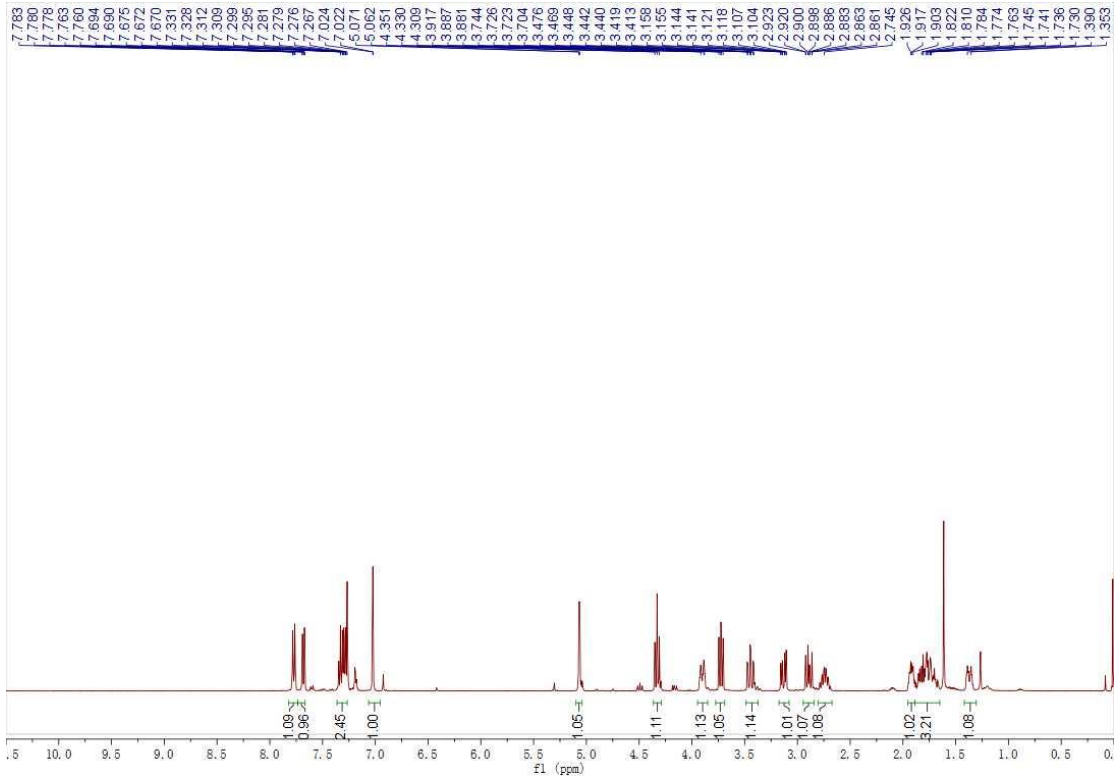

(11)

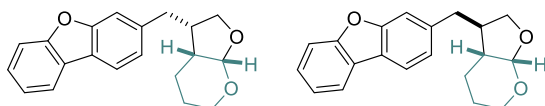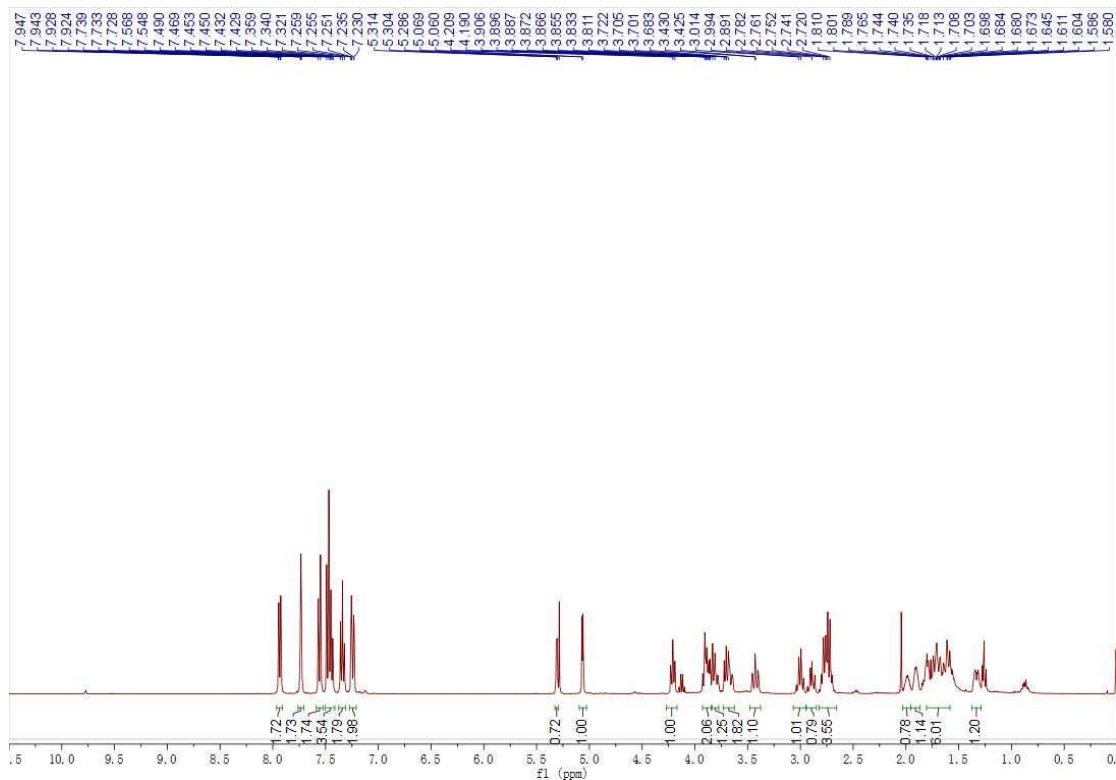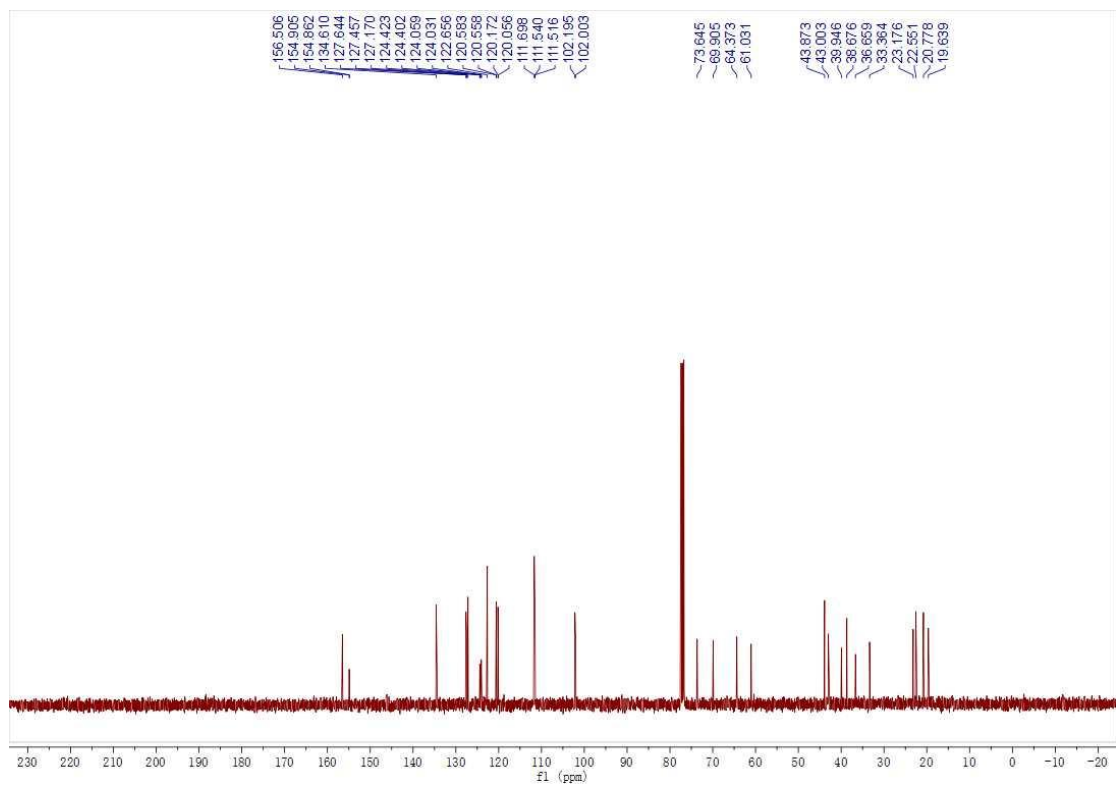

(12)

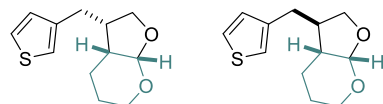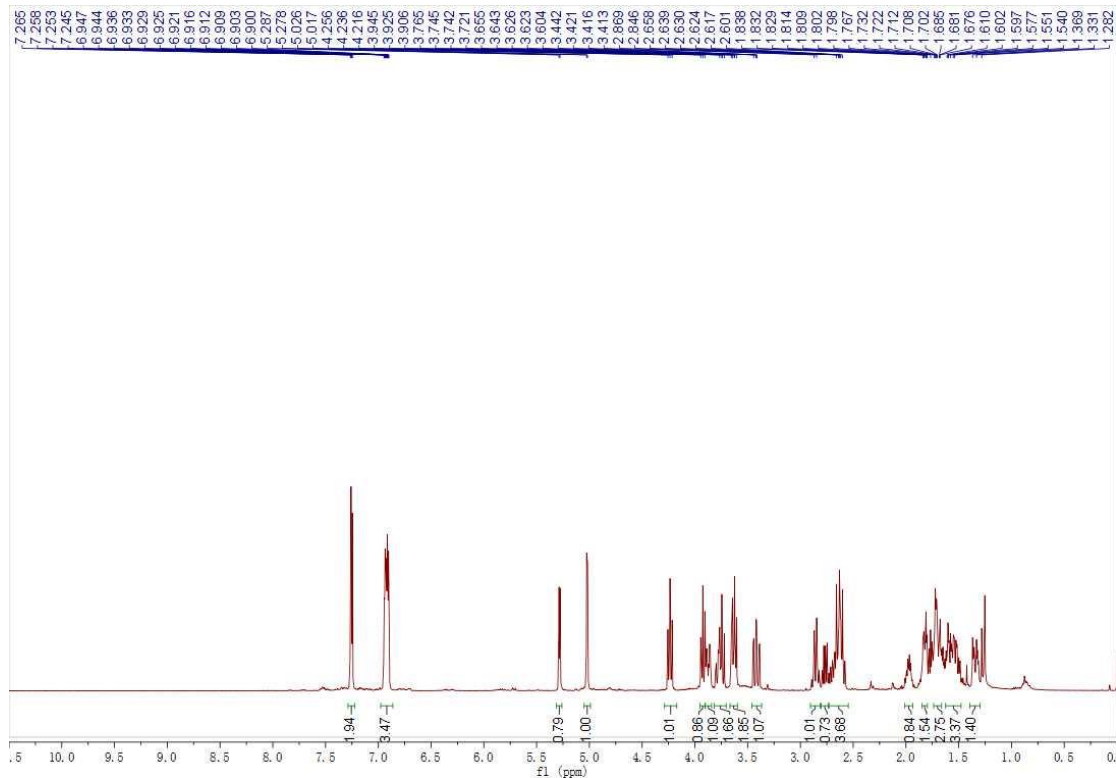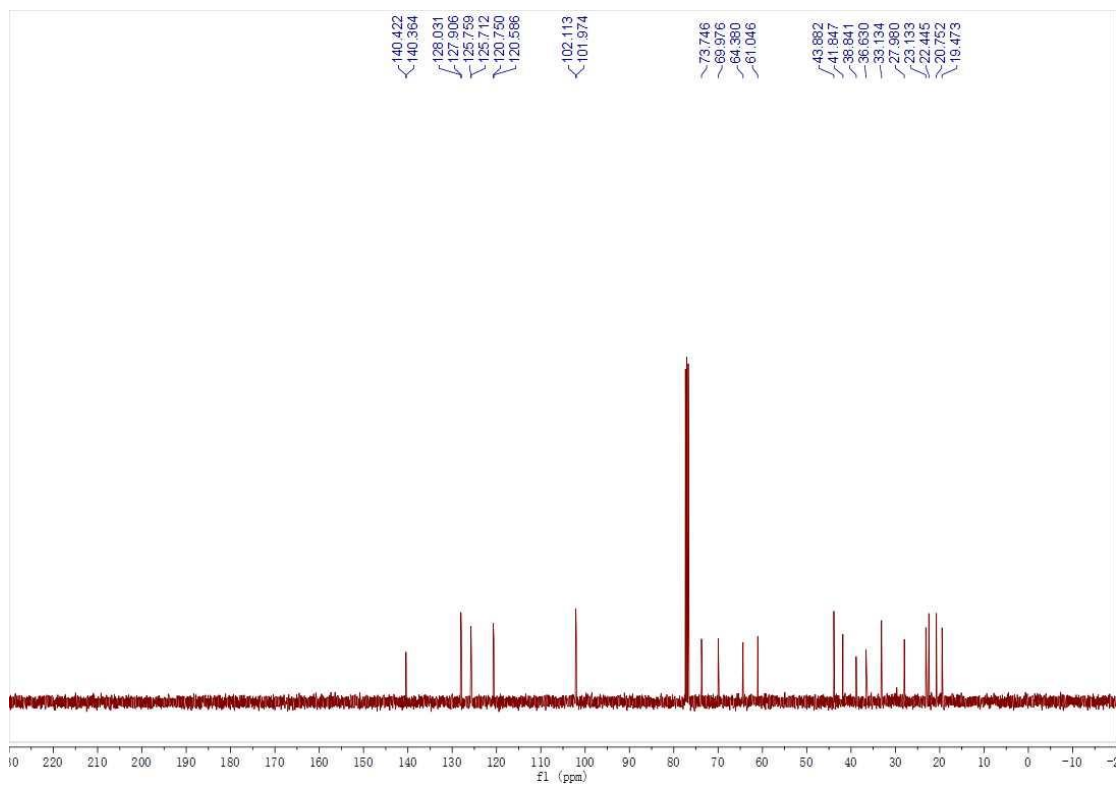

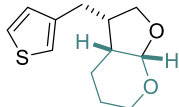

**cis-syn**

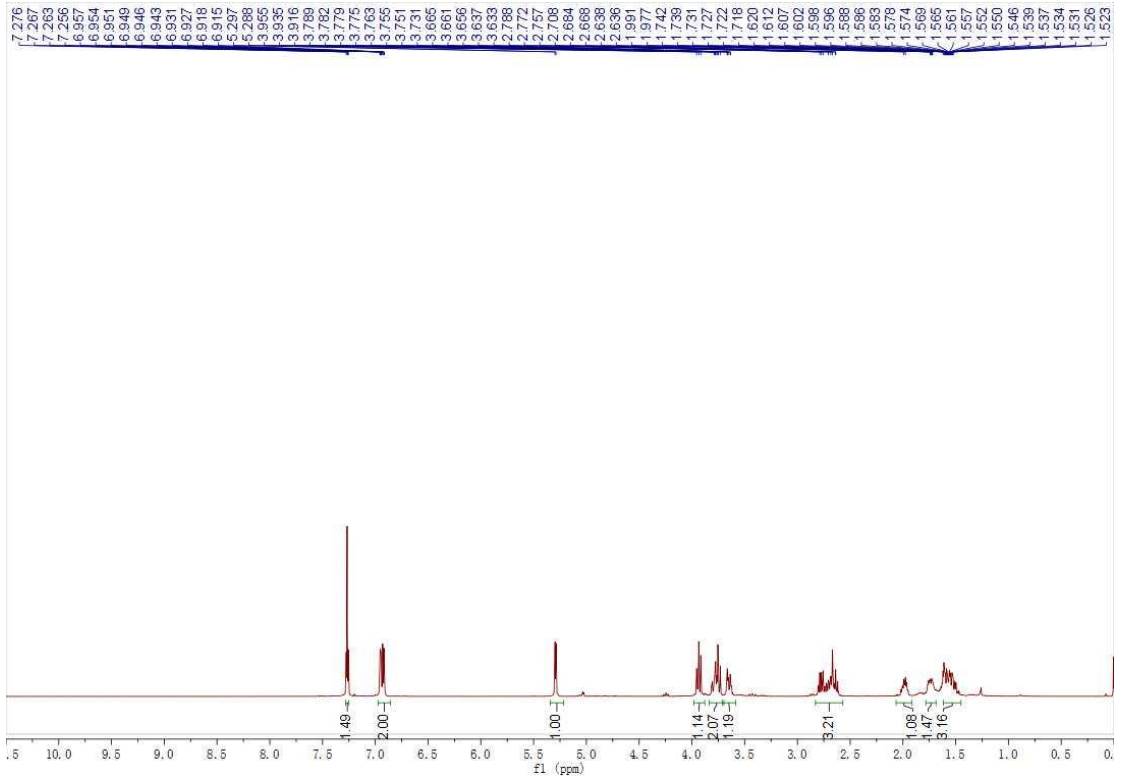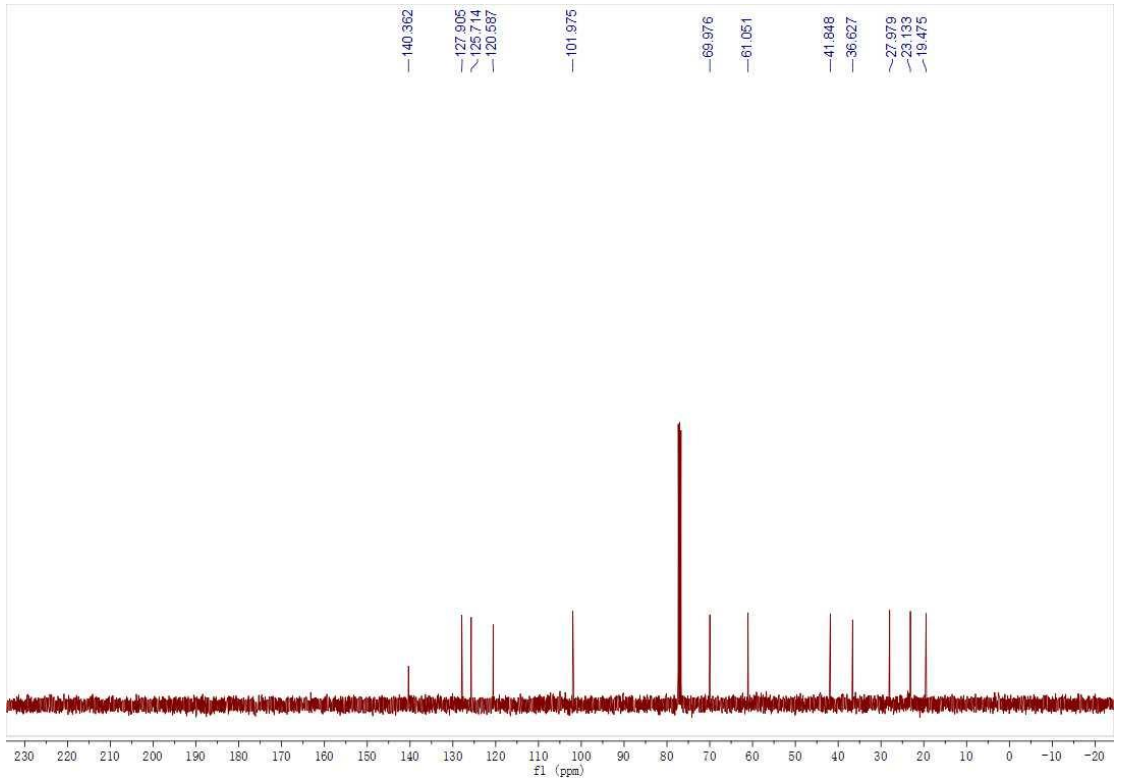

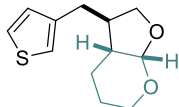

cis-anti

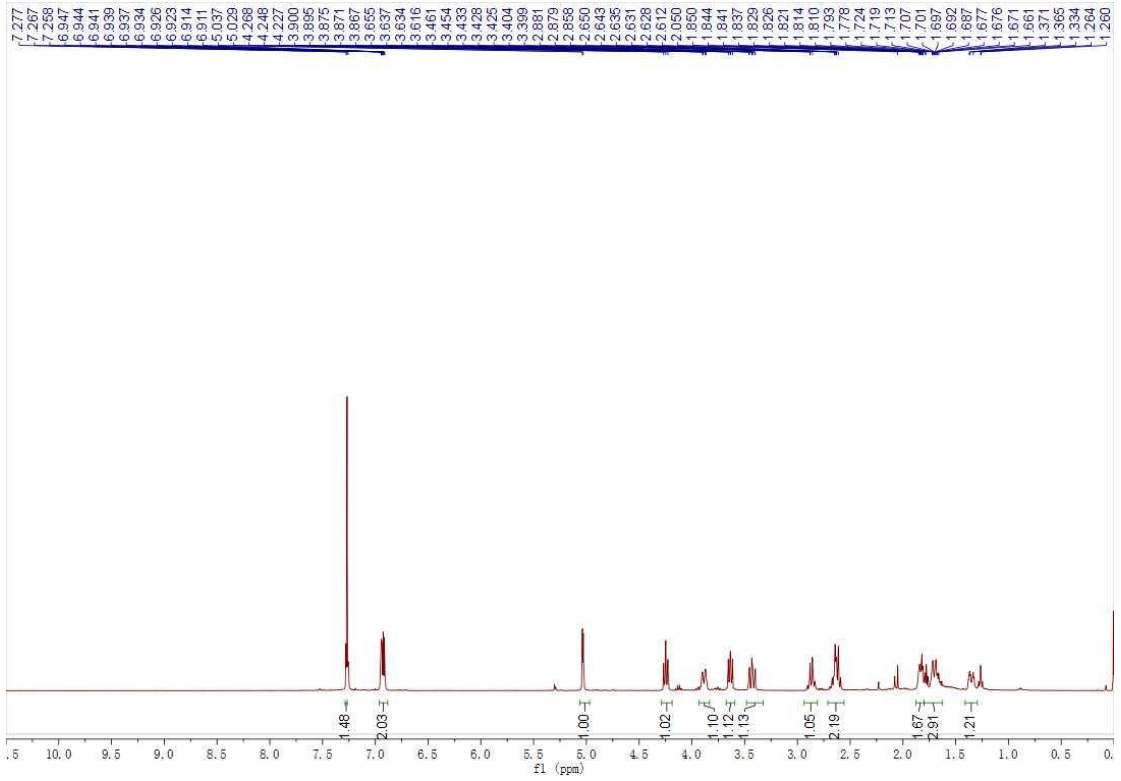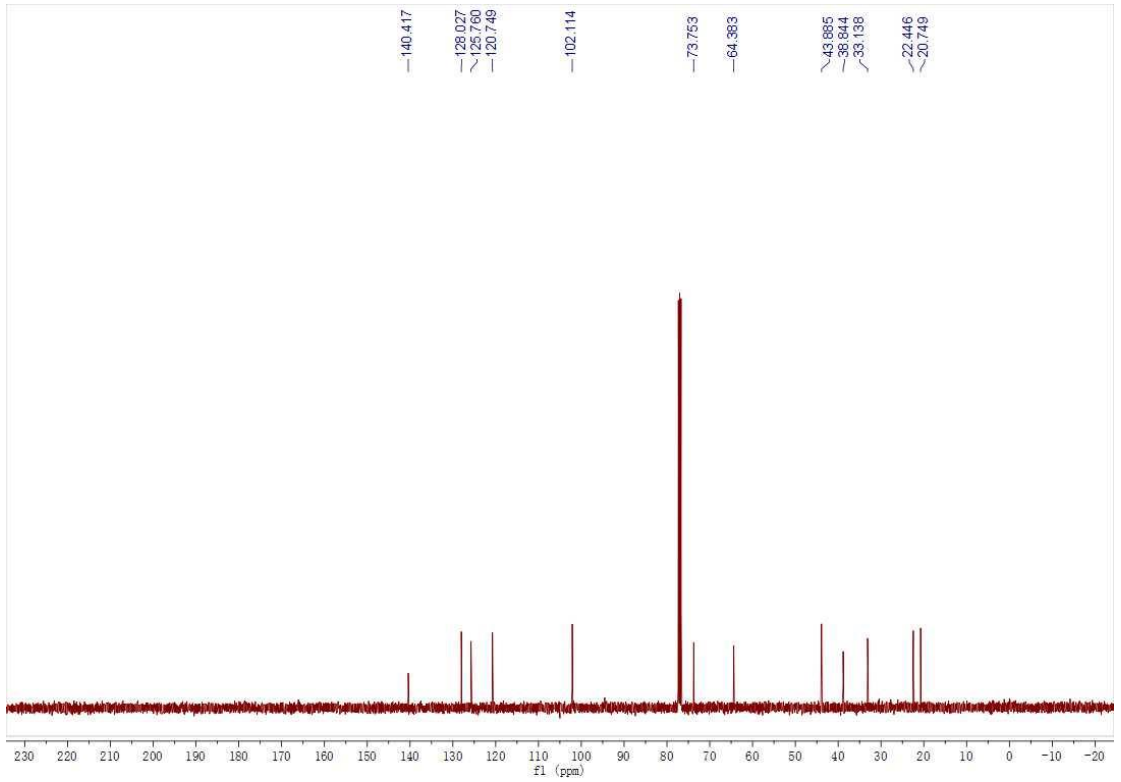

(13)

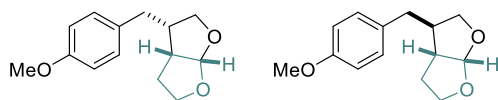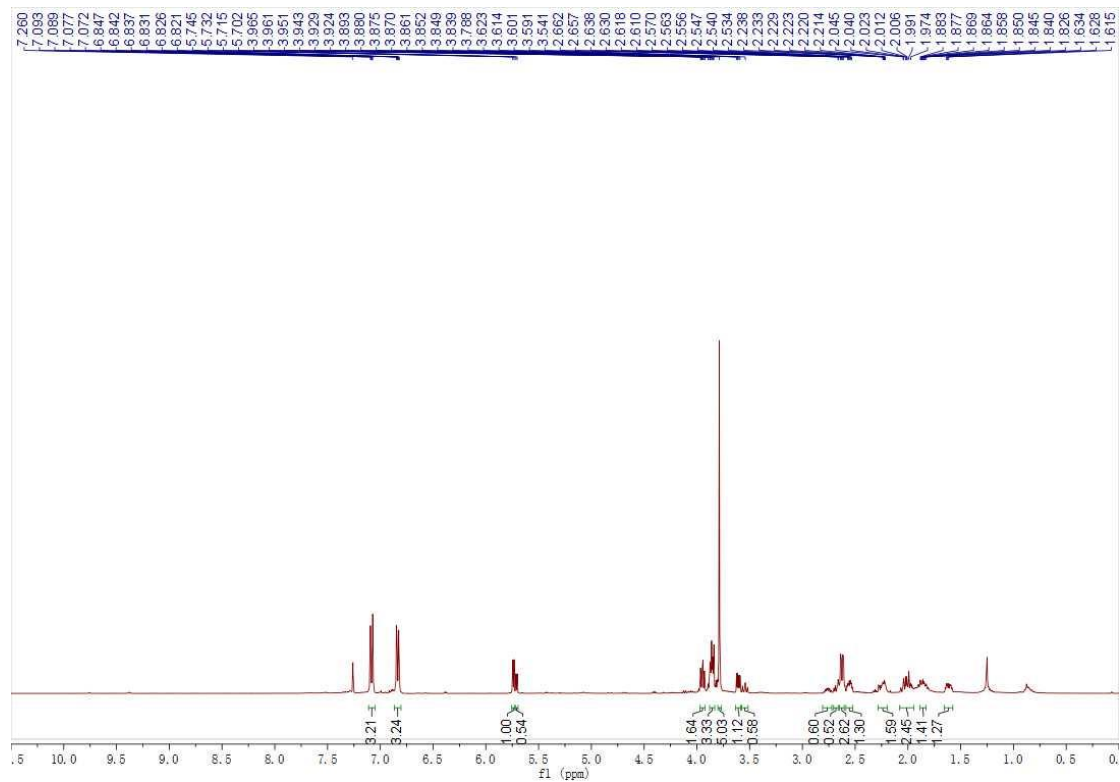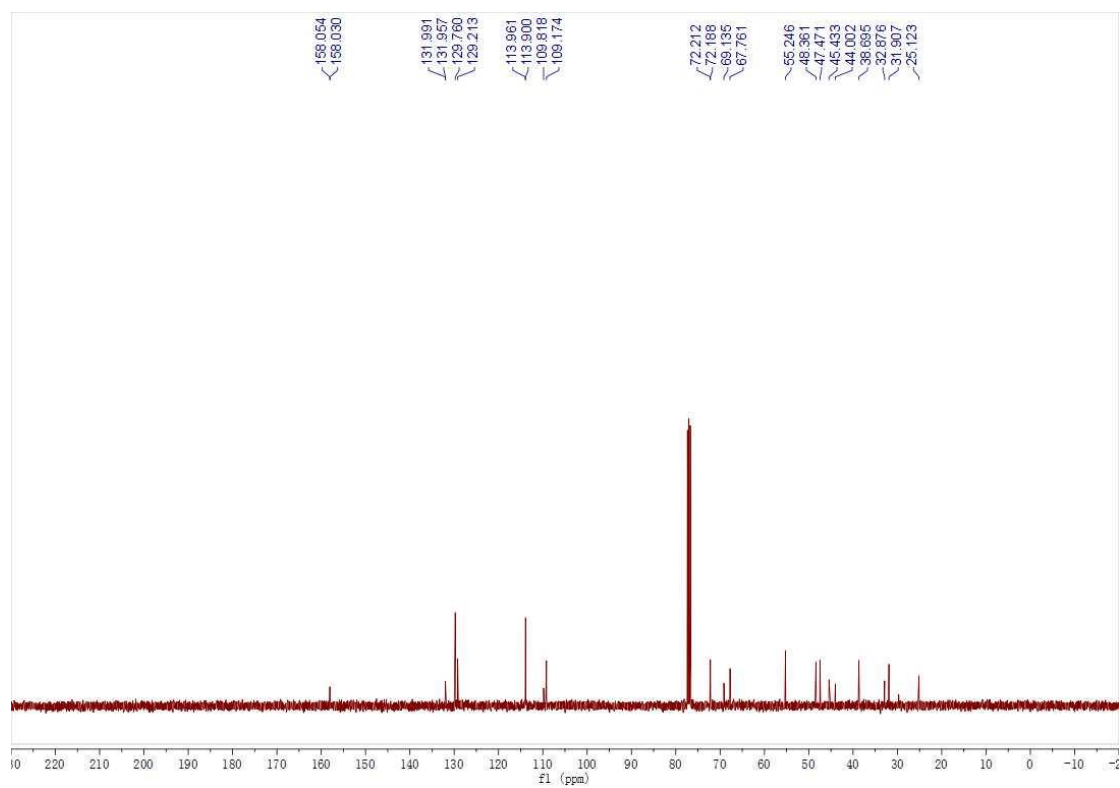

(14)

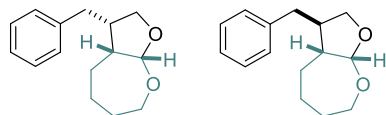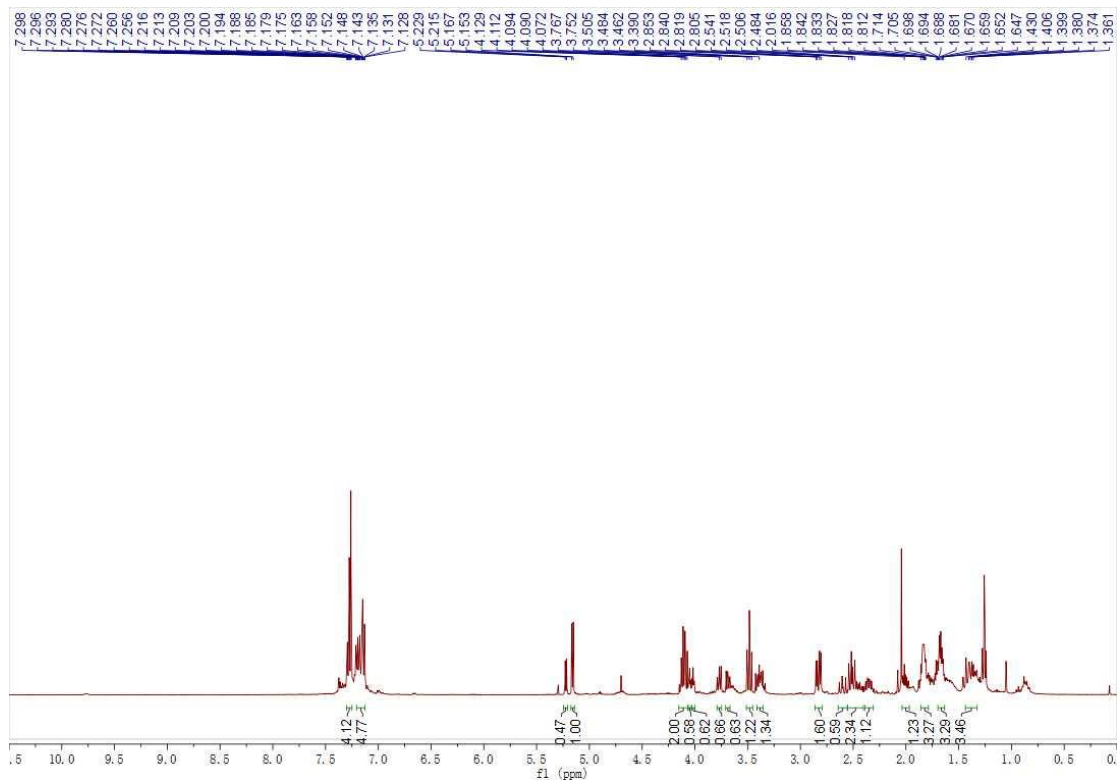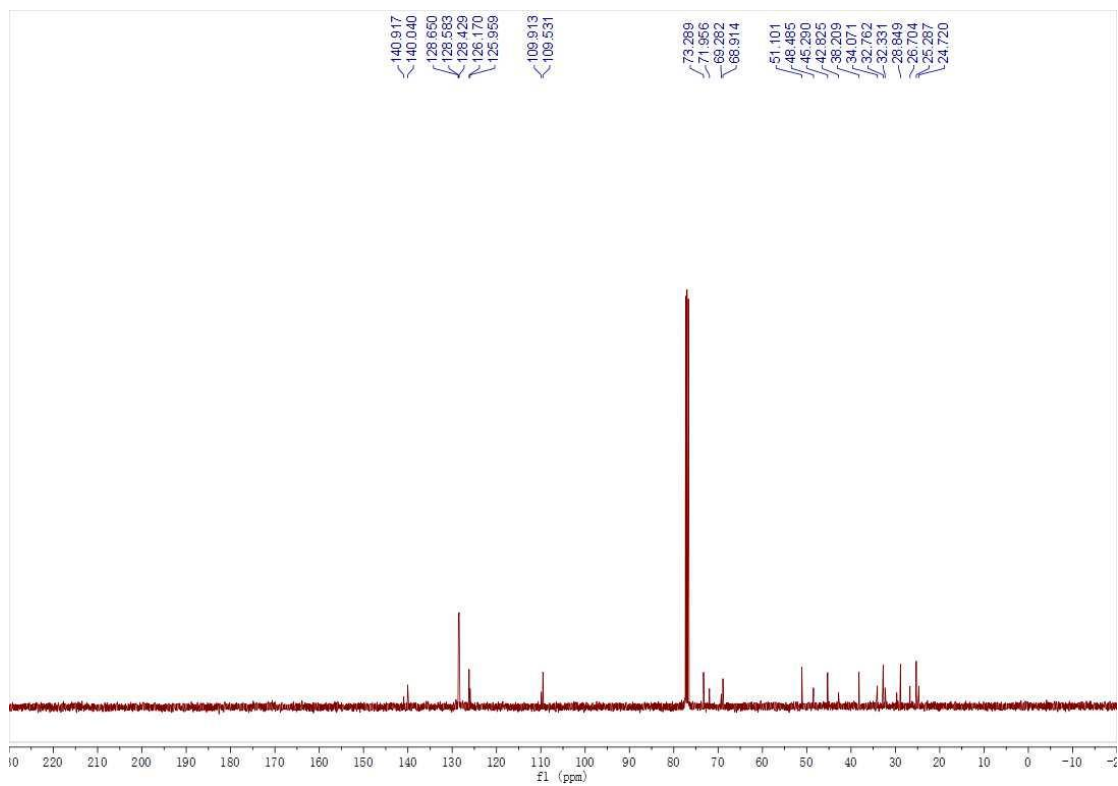



(15)

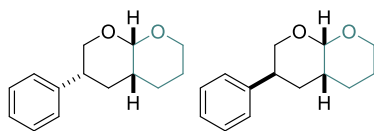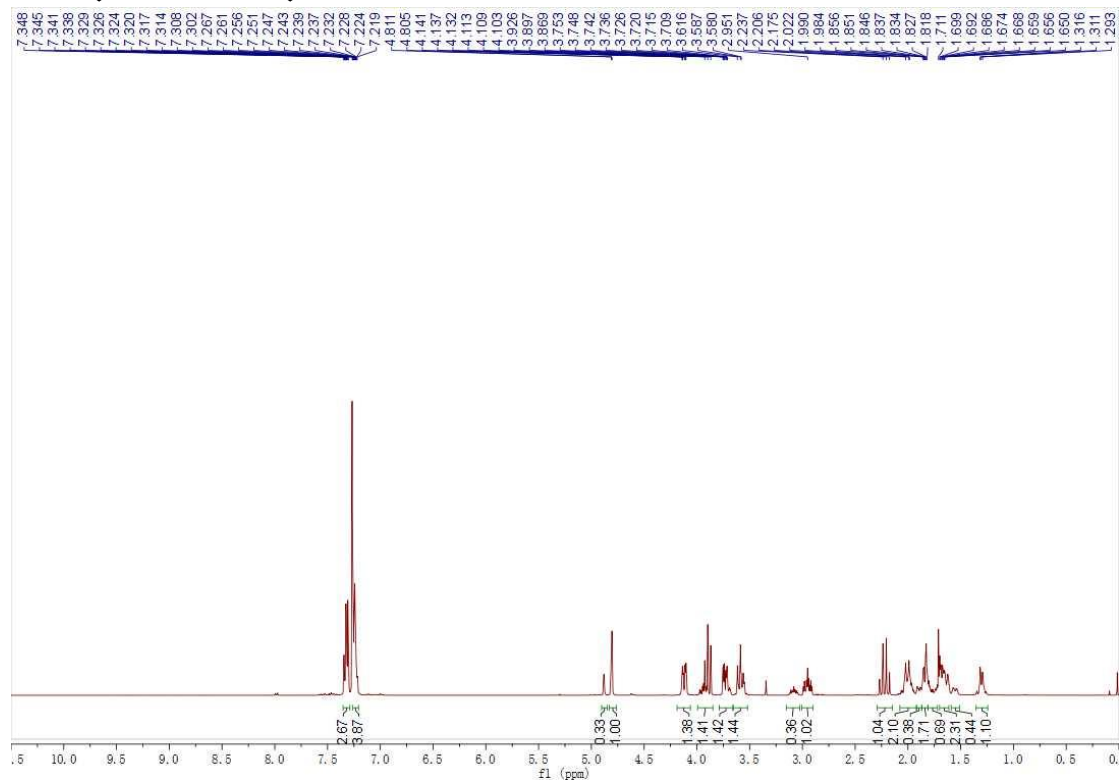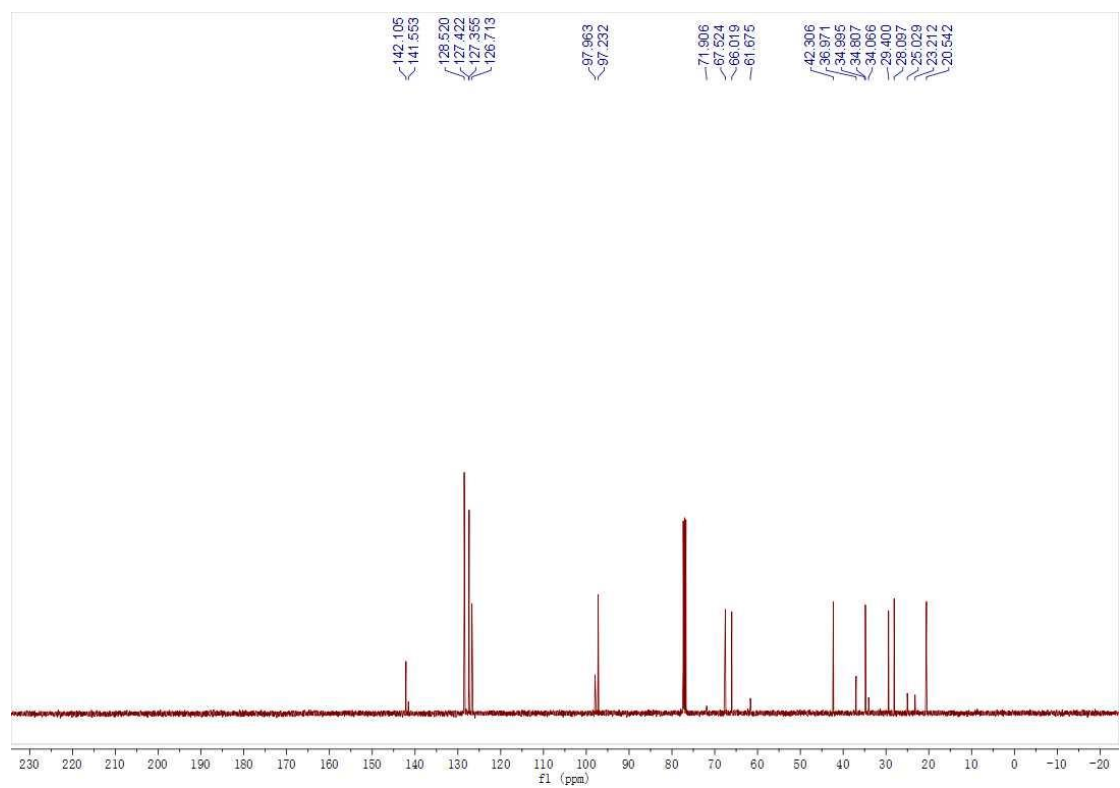

(16)

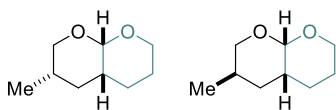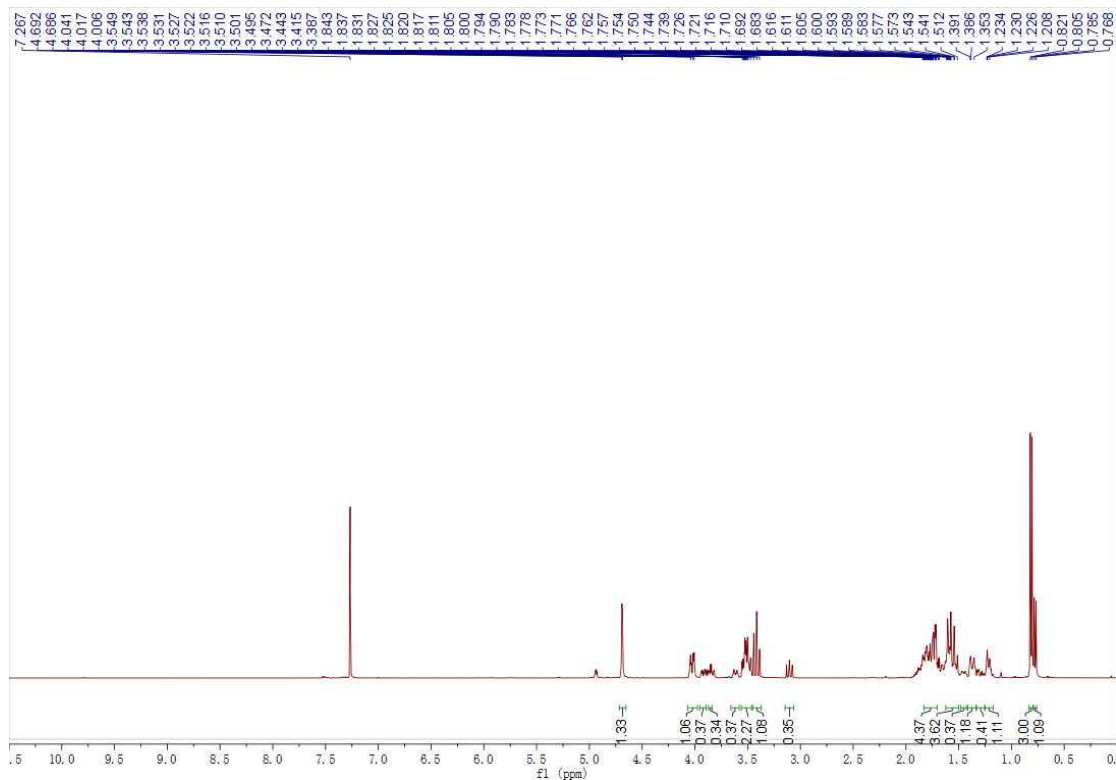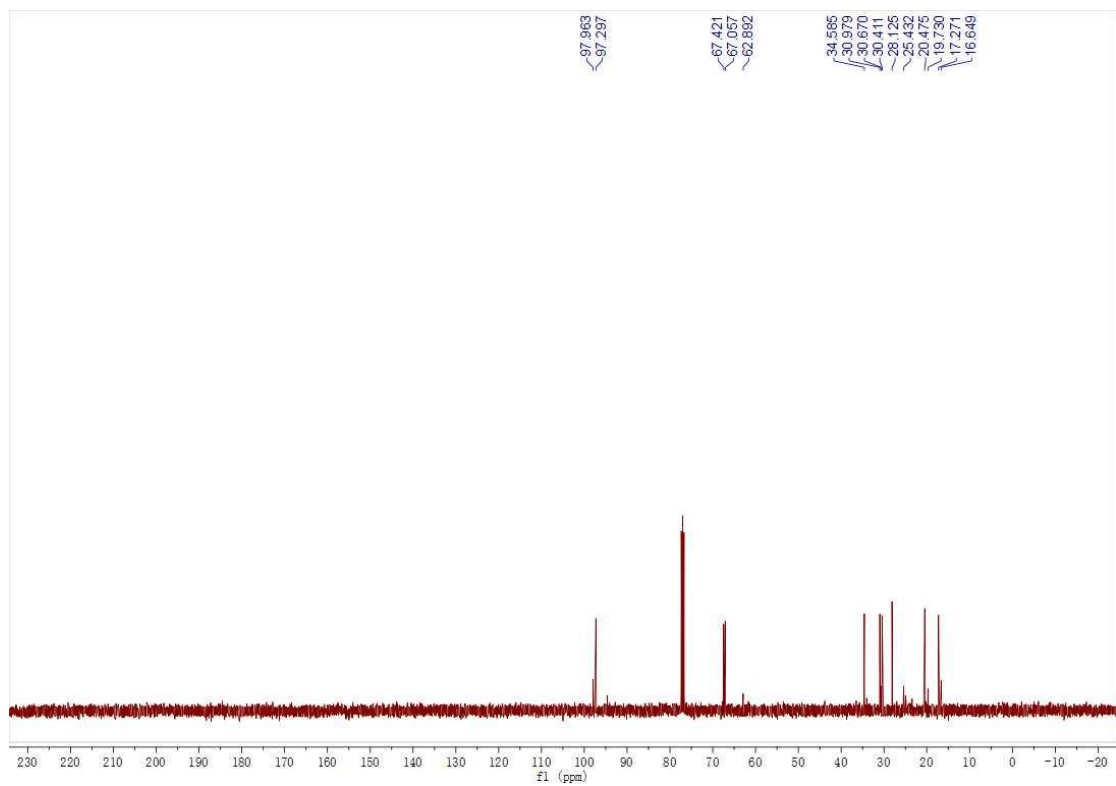

(17)

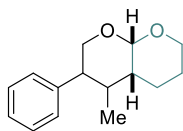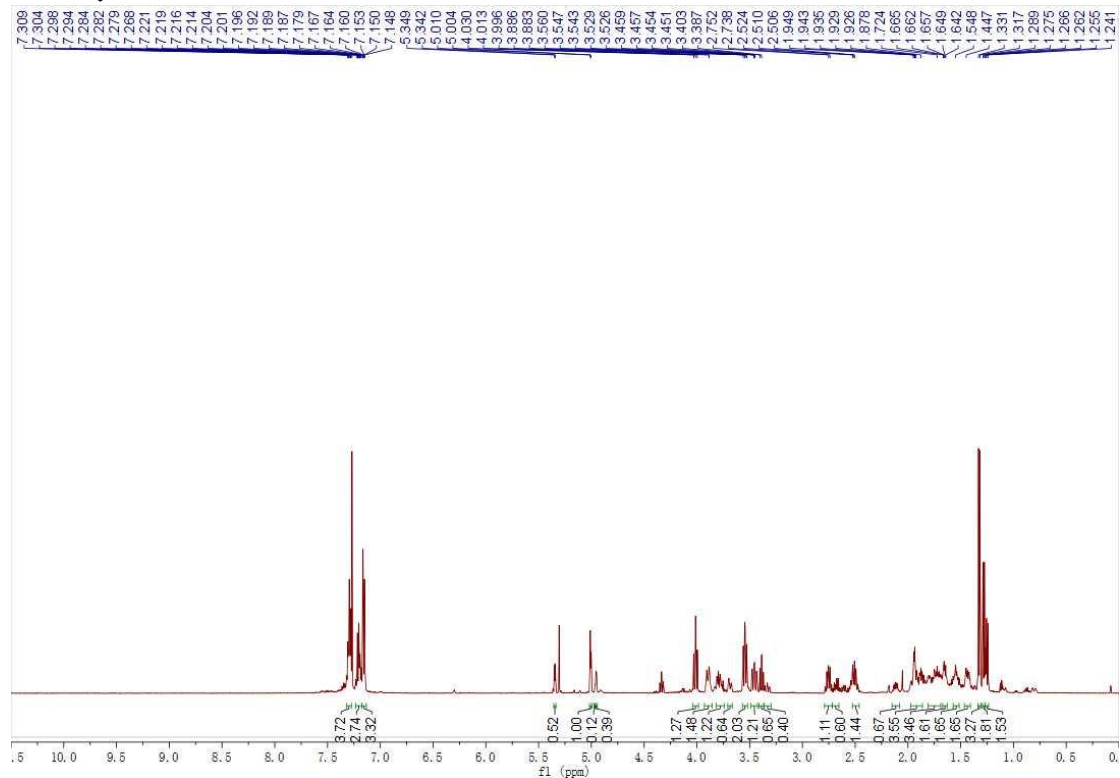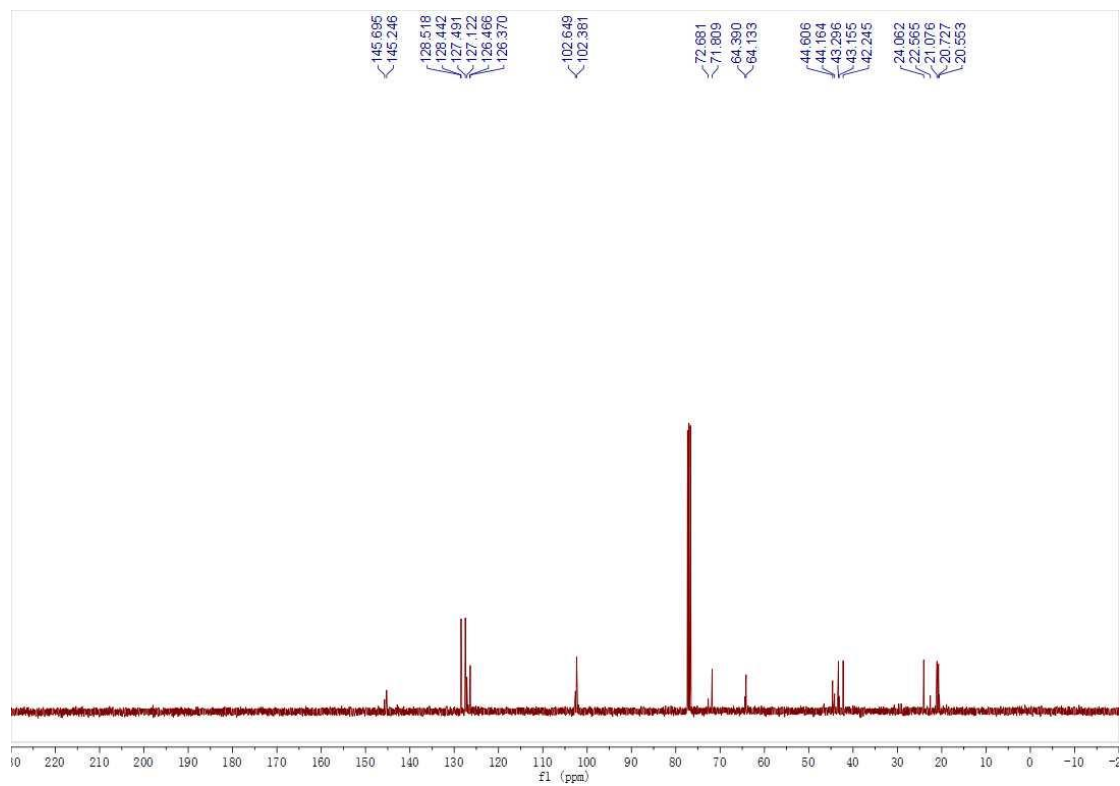

(18)

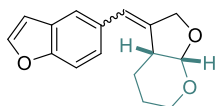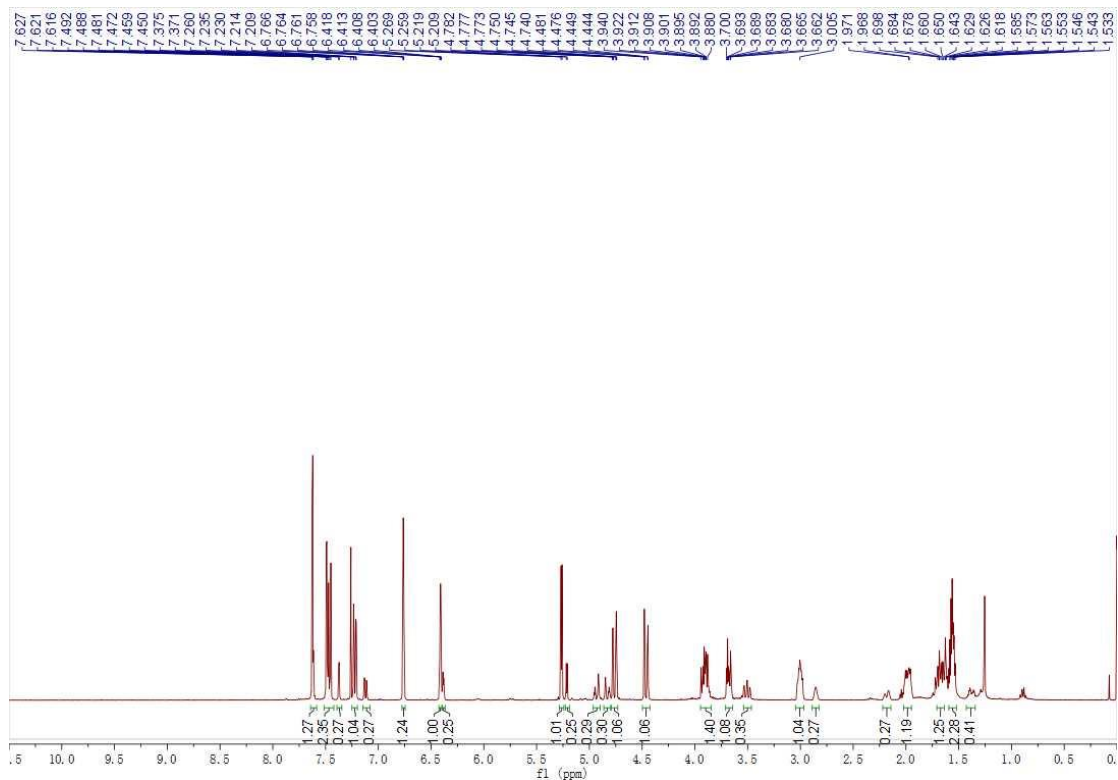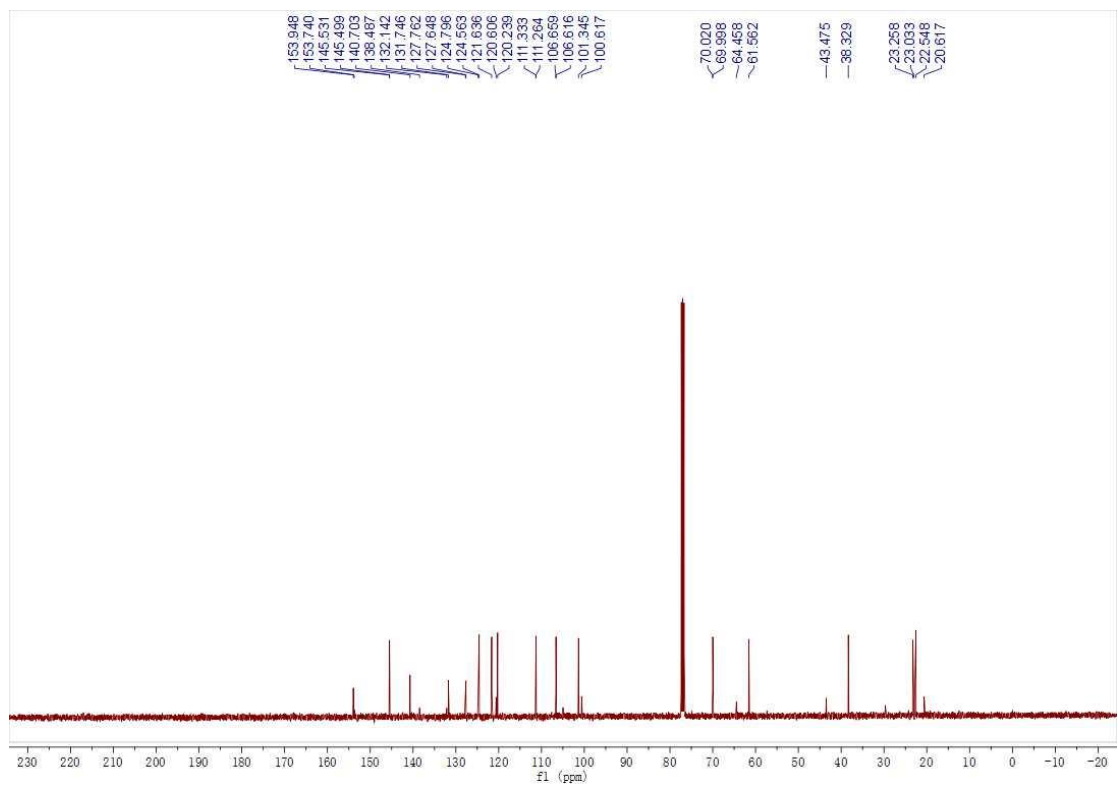

(19)

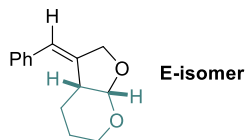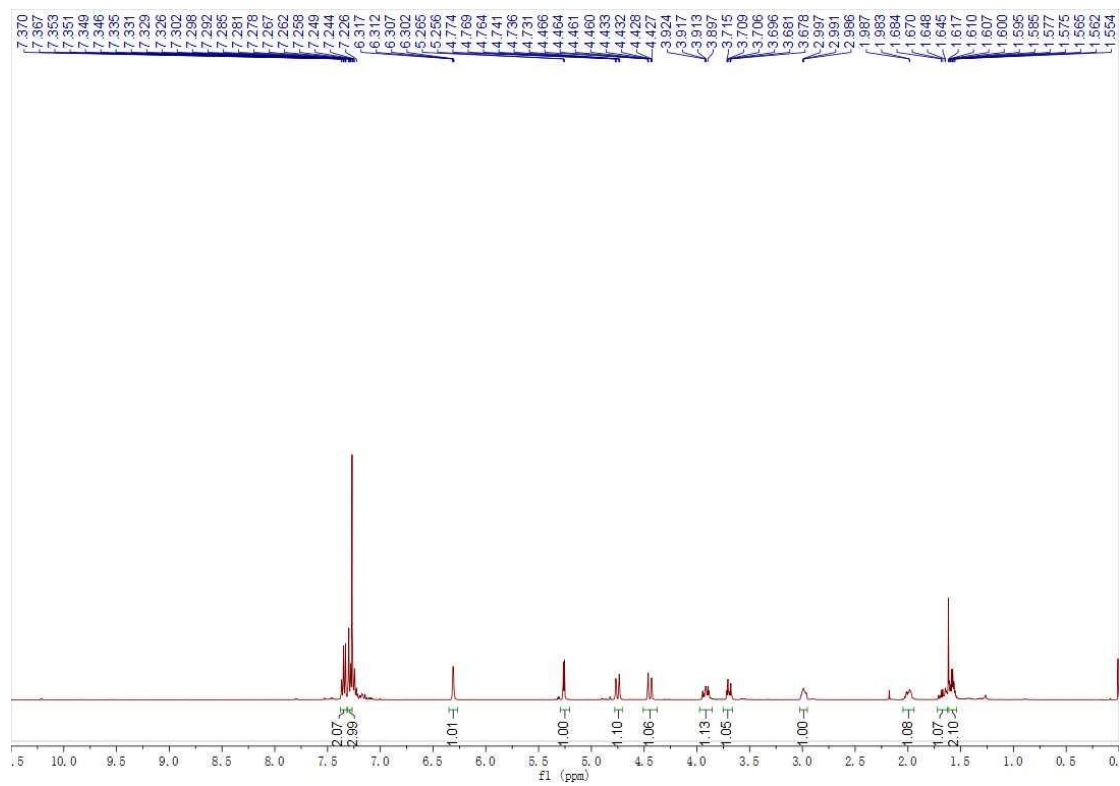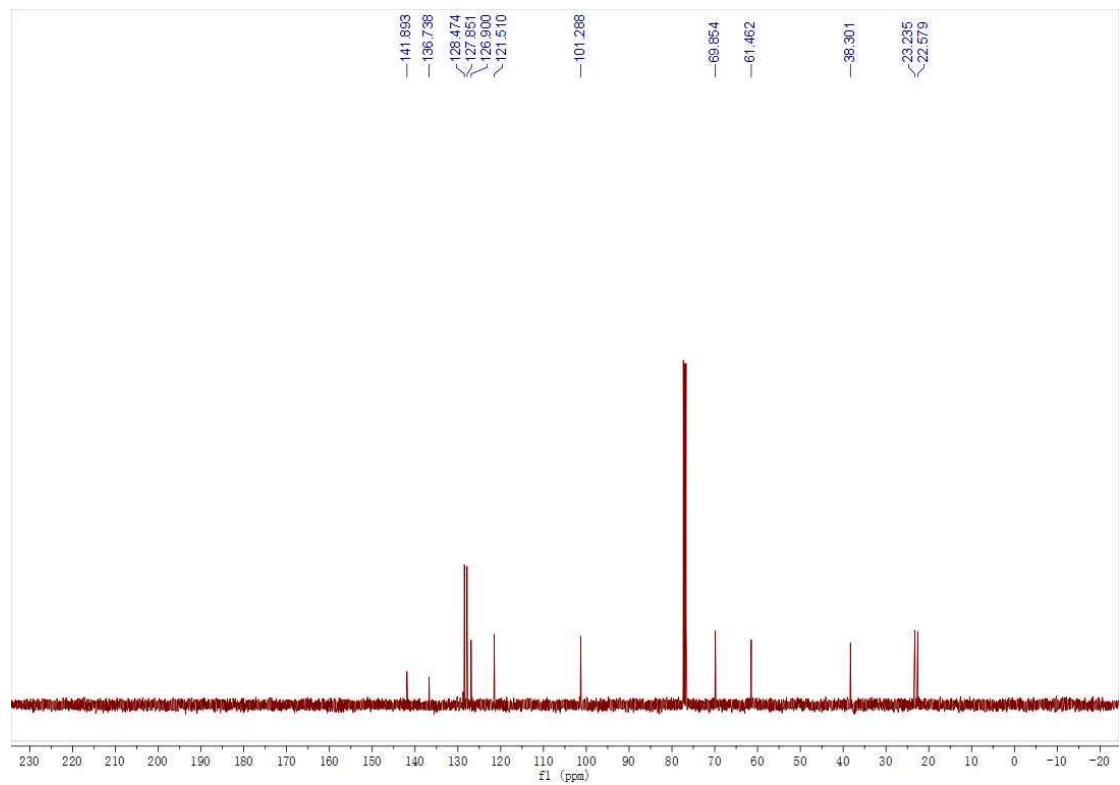

(19)

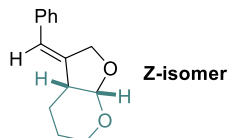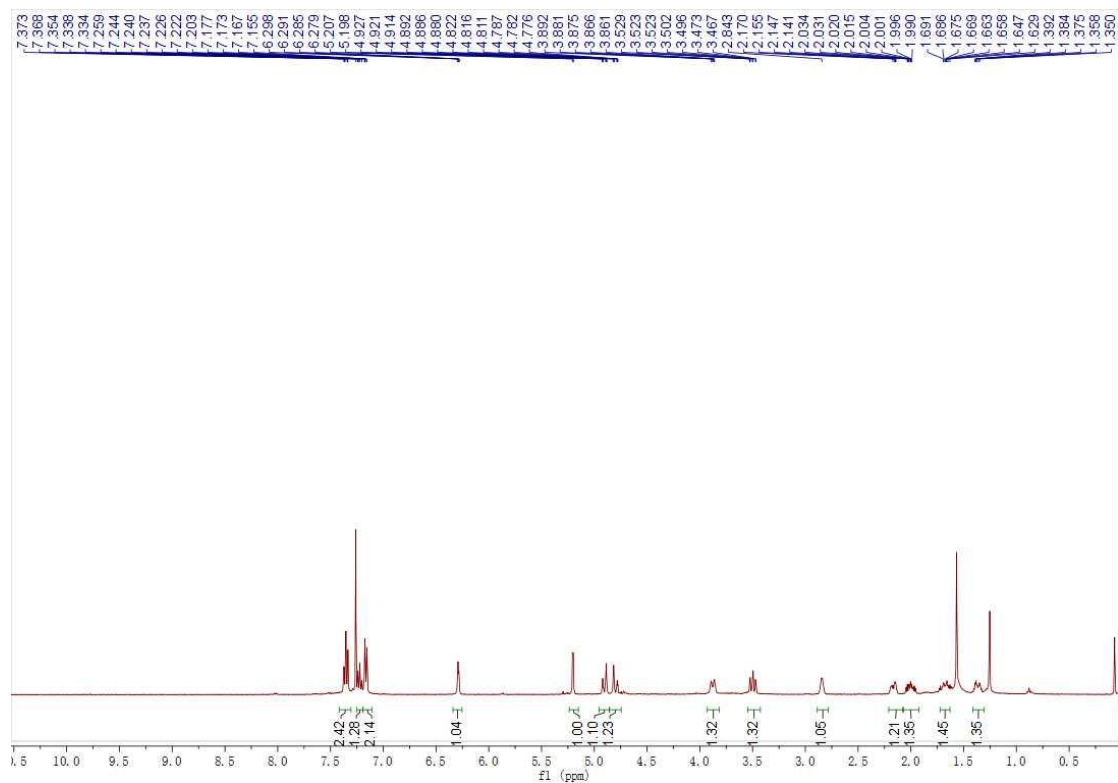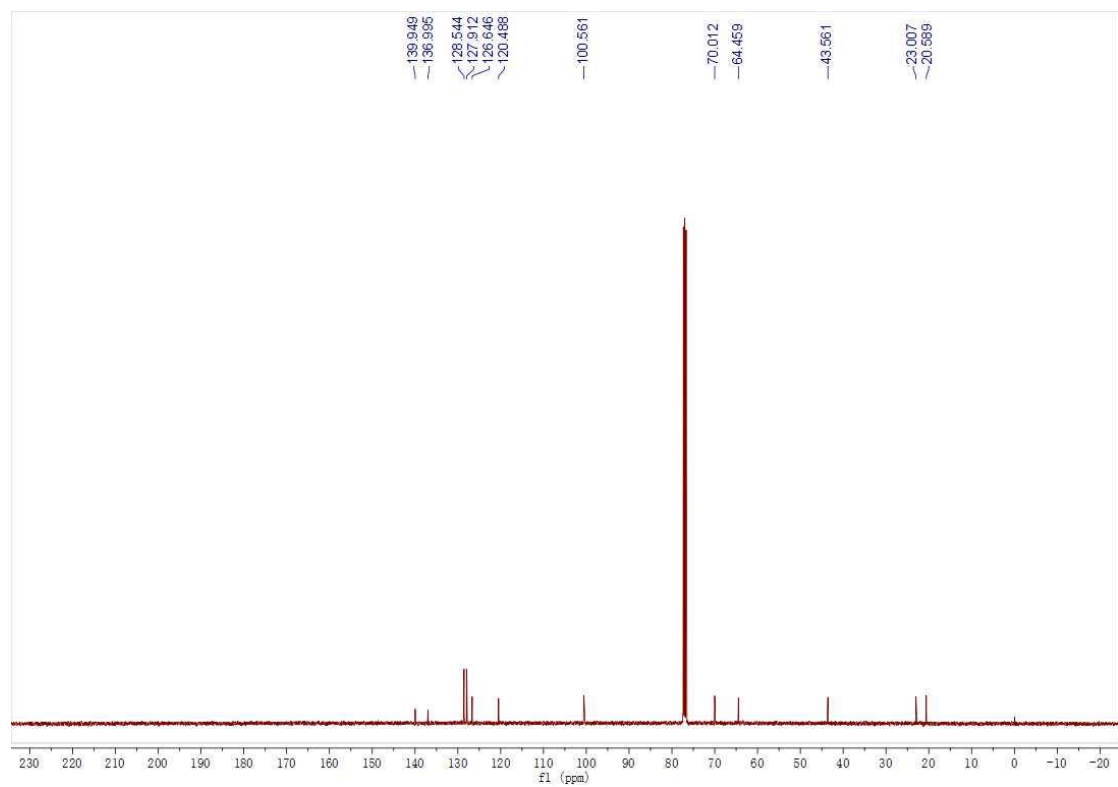

(20)

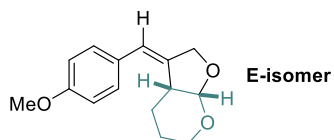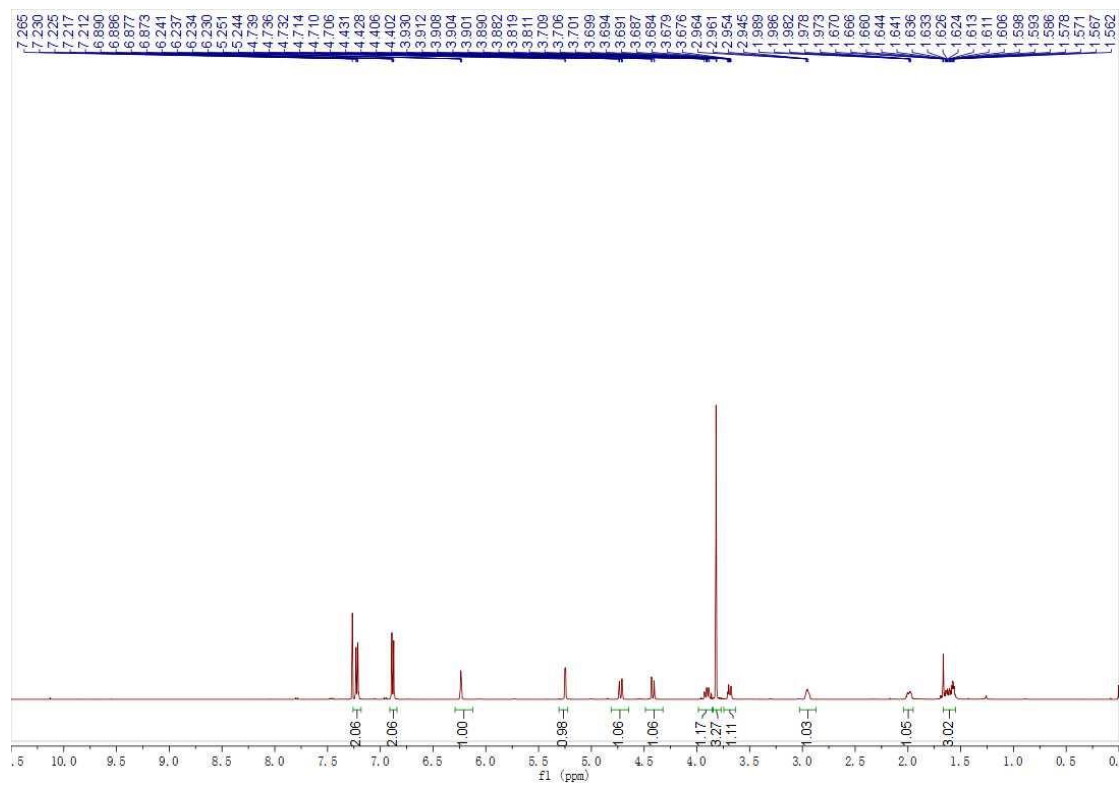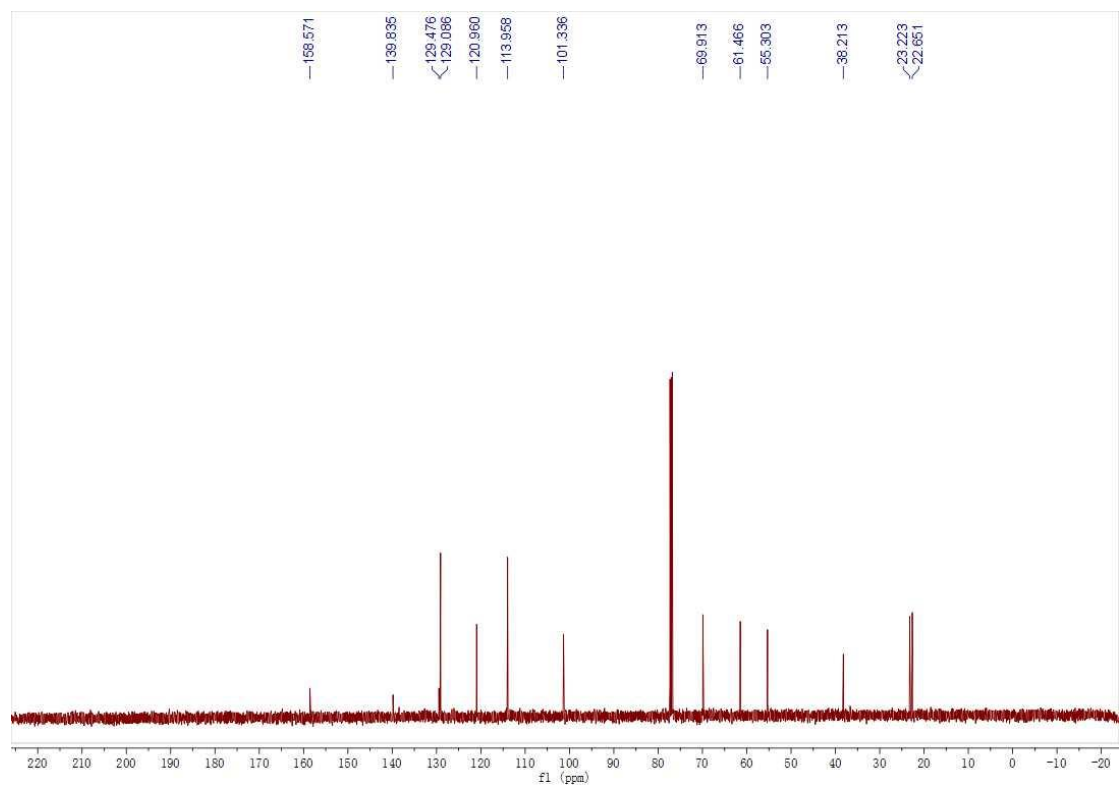

(20)

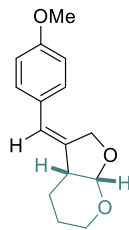

Z-isomer

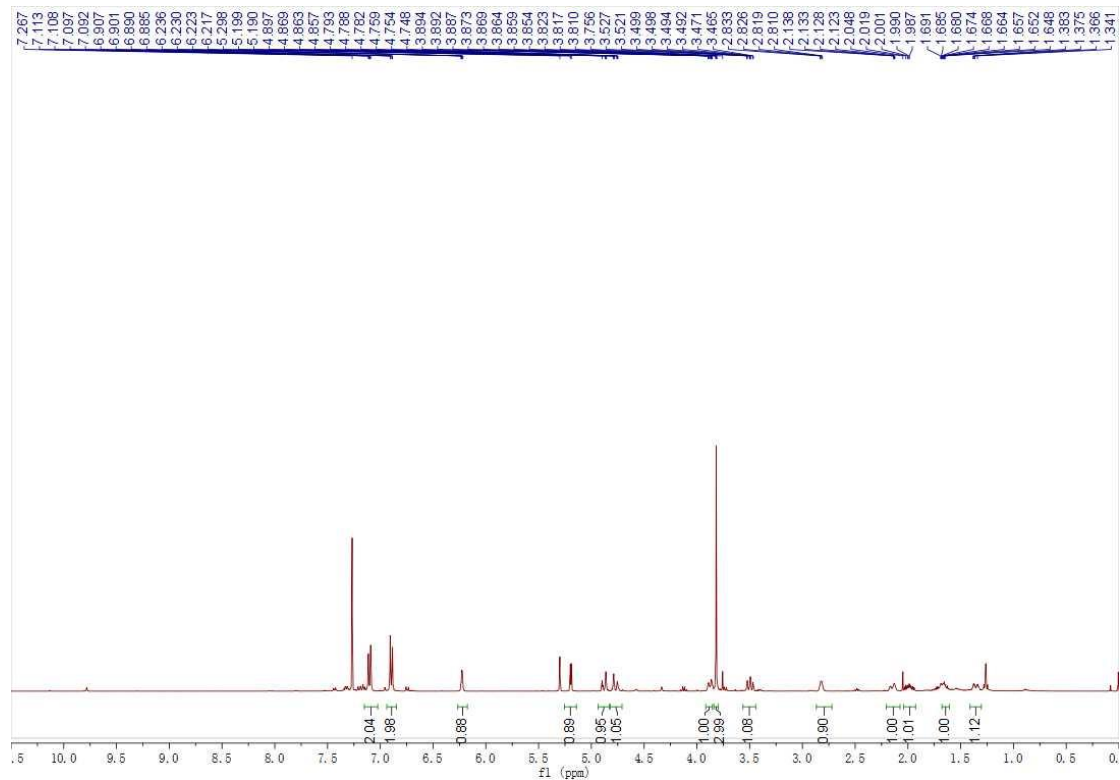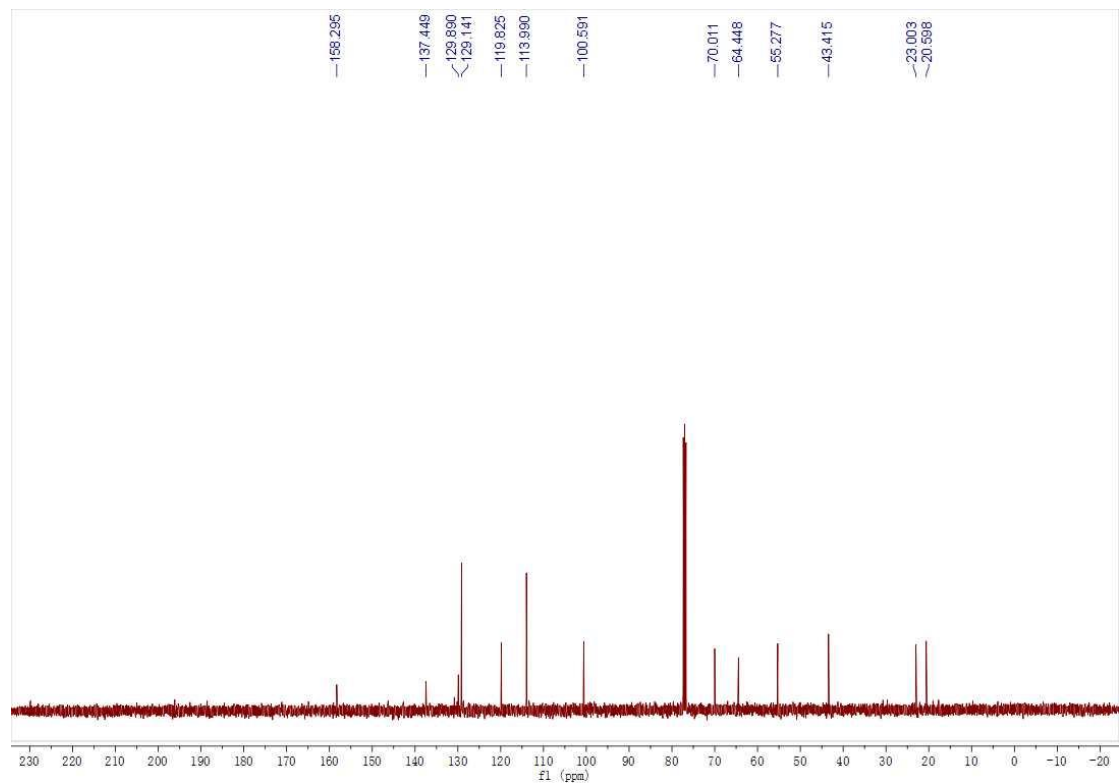





(22)

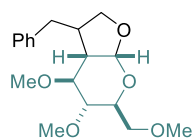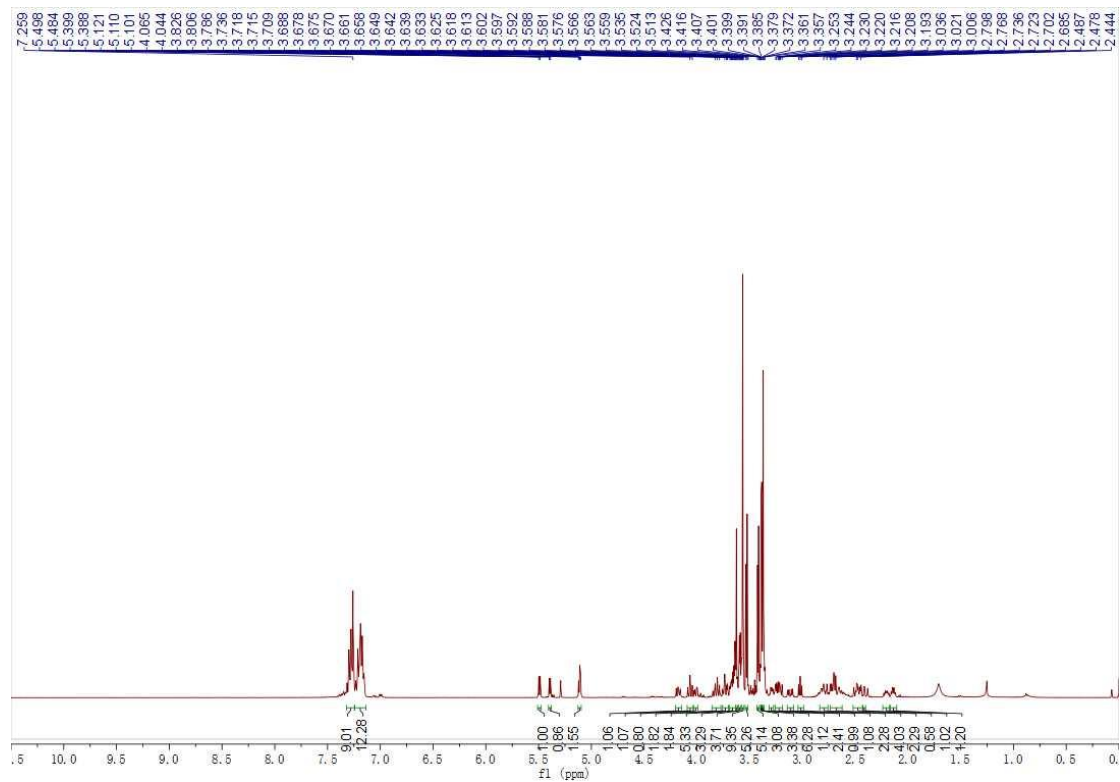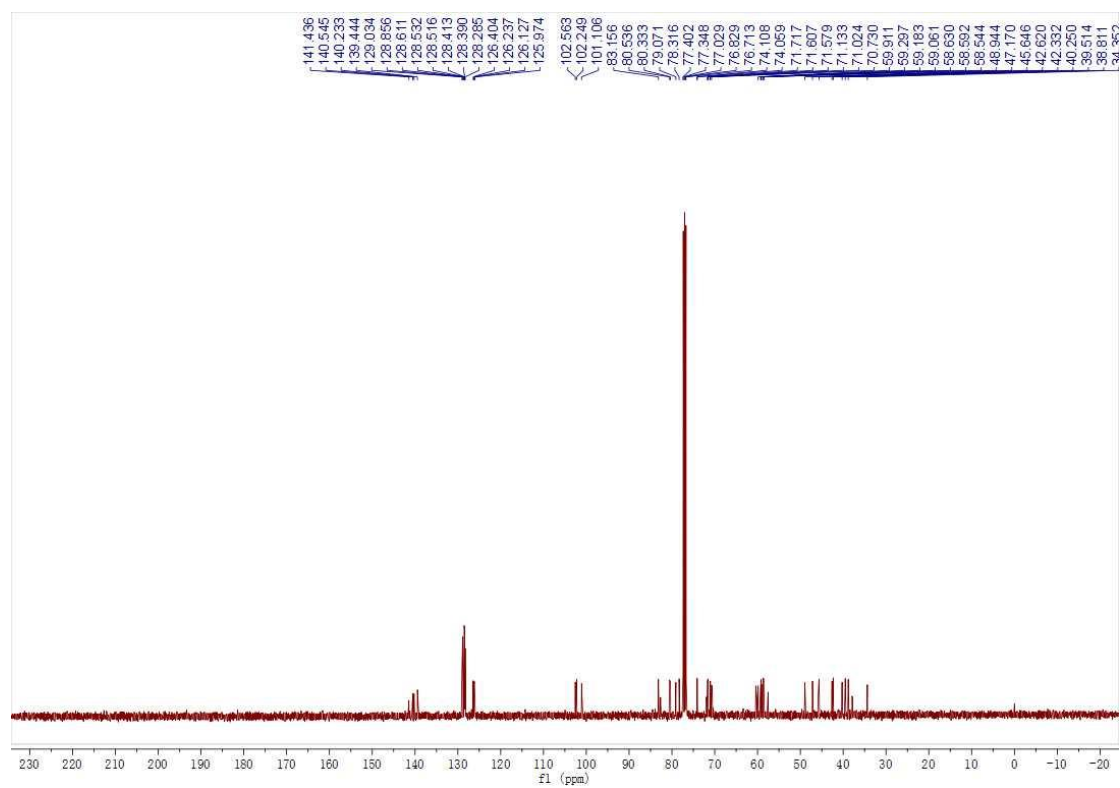

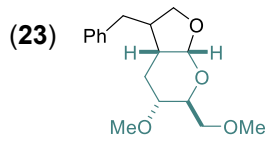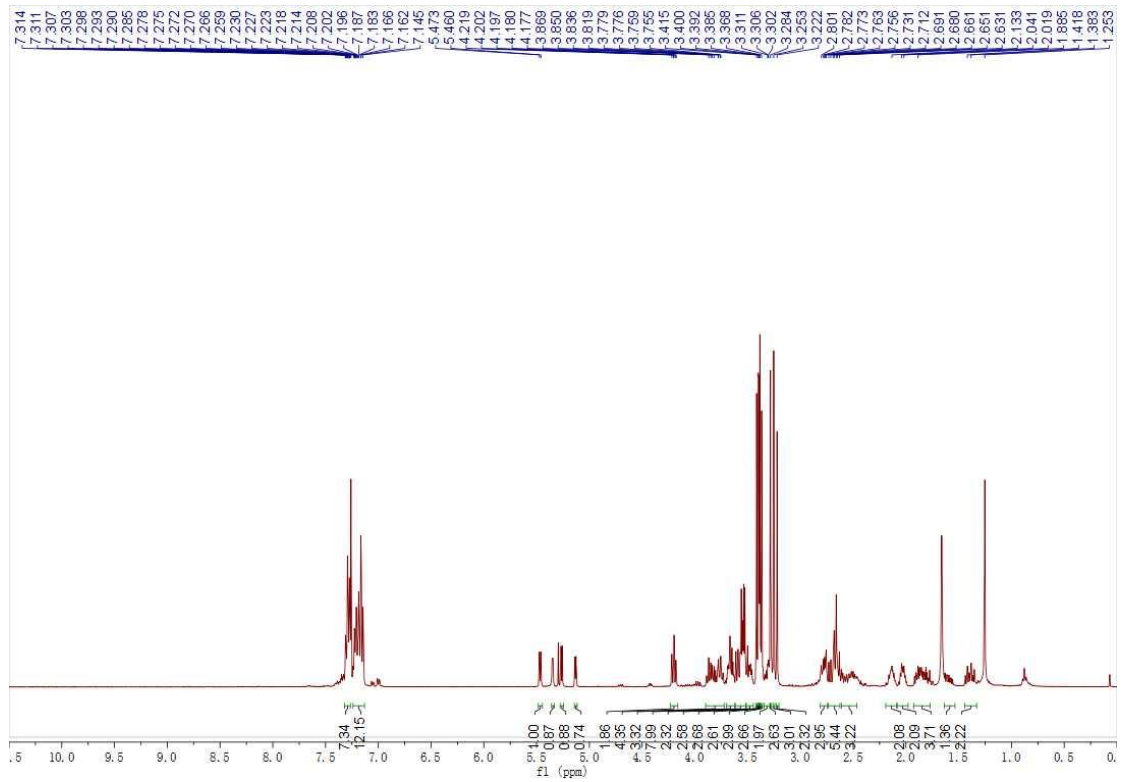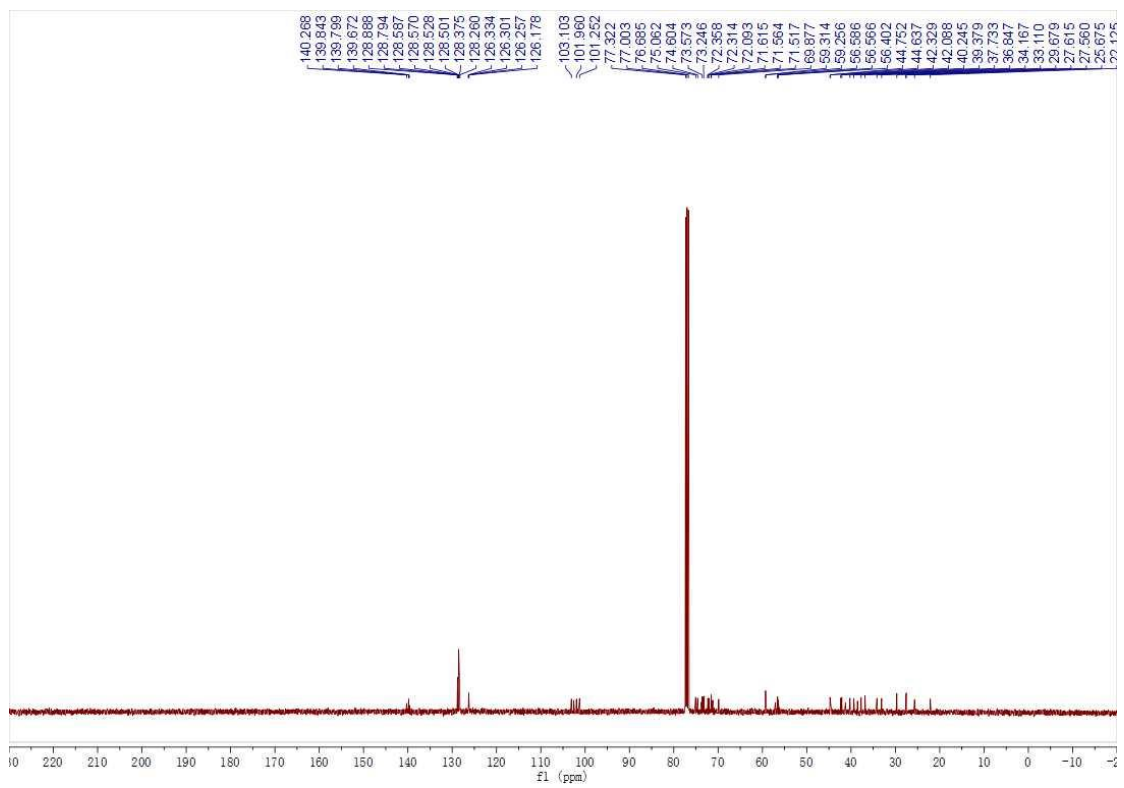

(24)

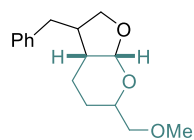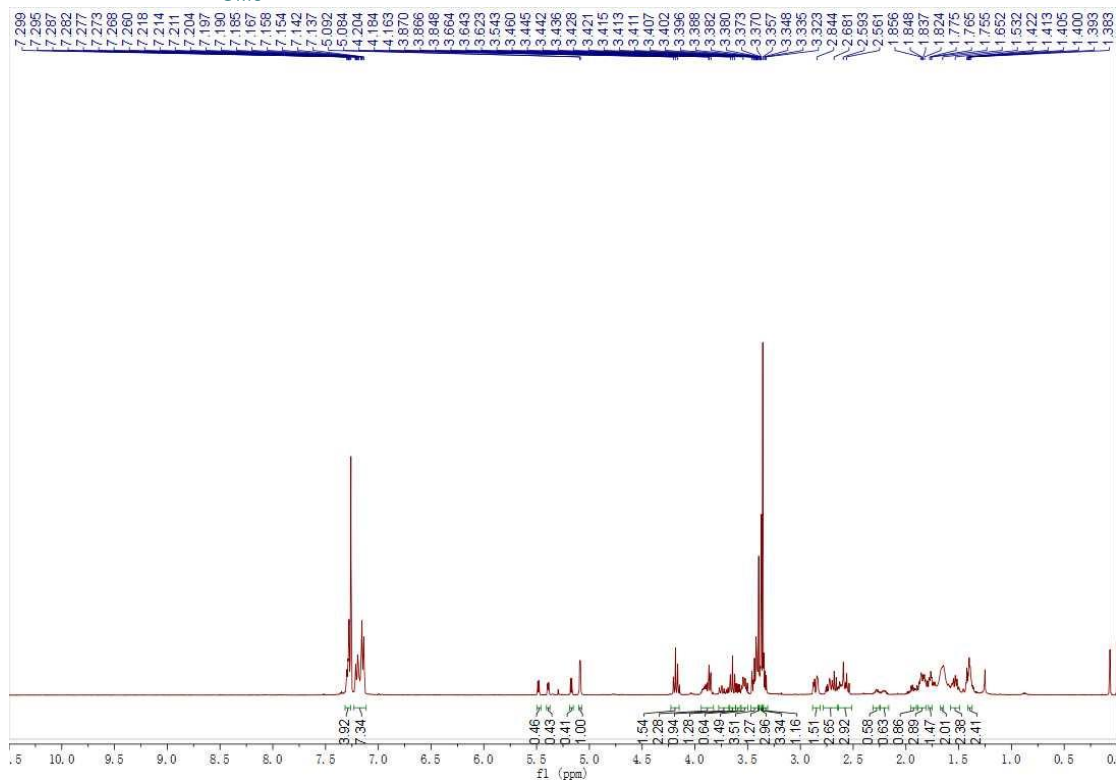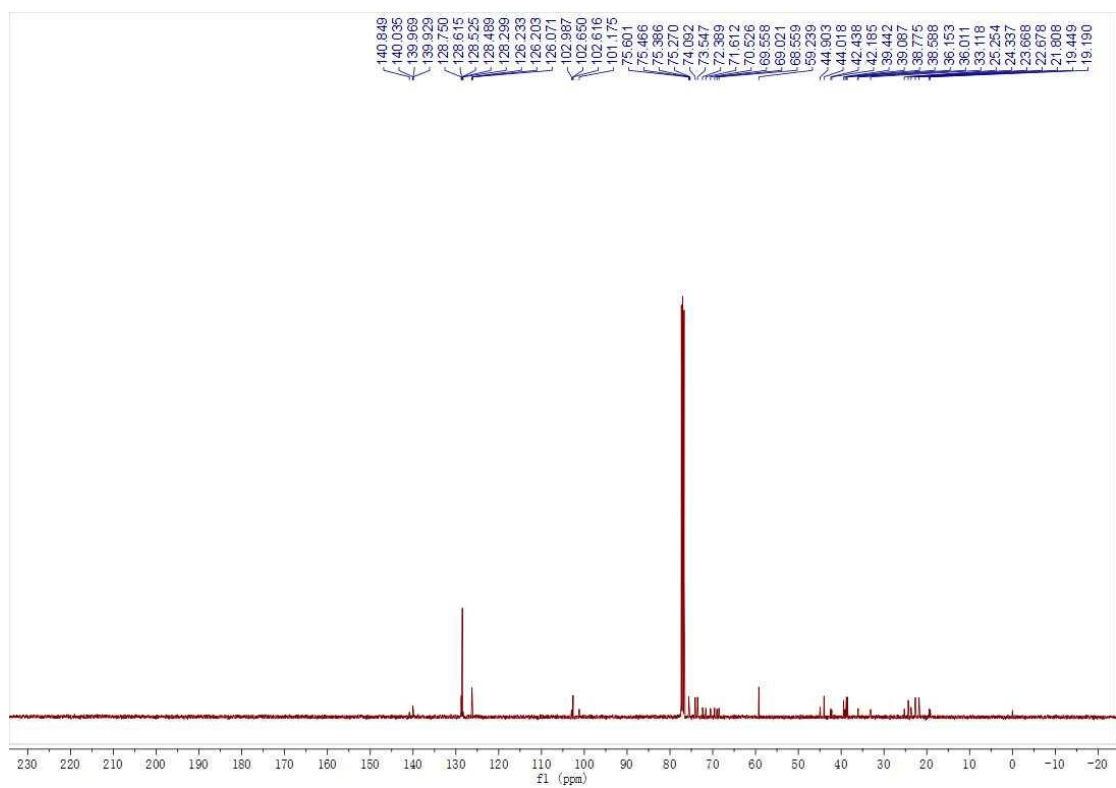

(25)

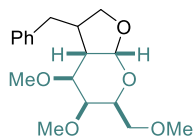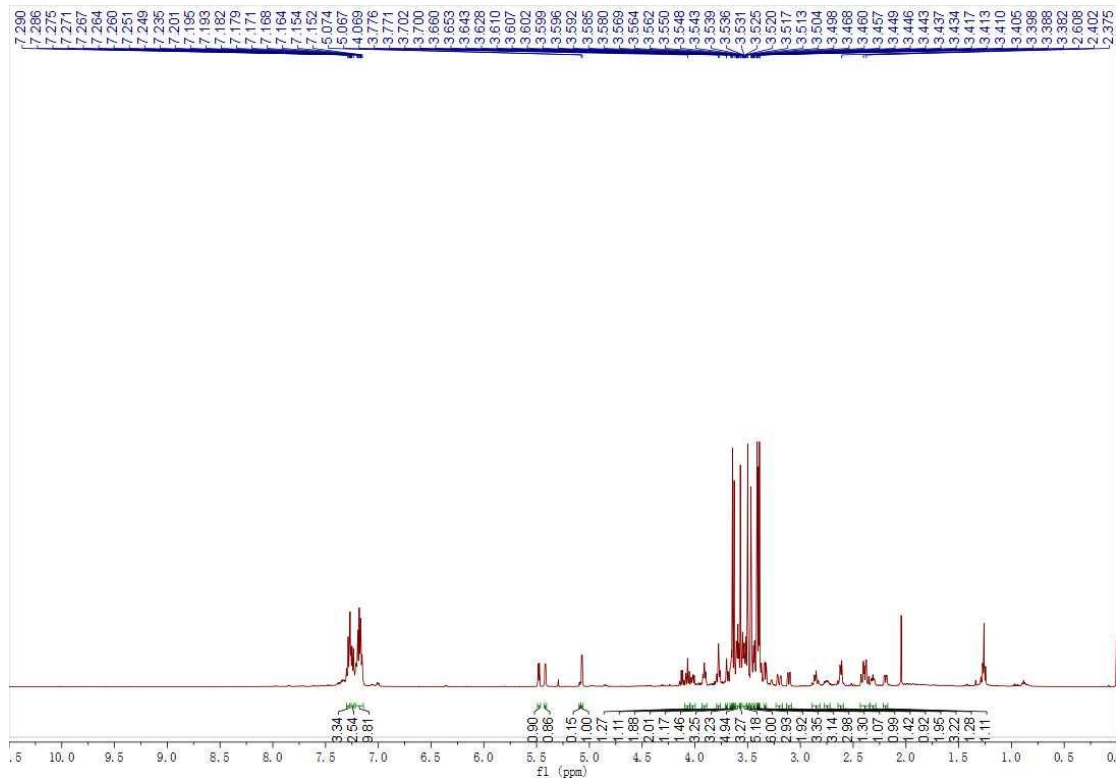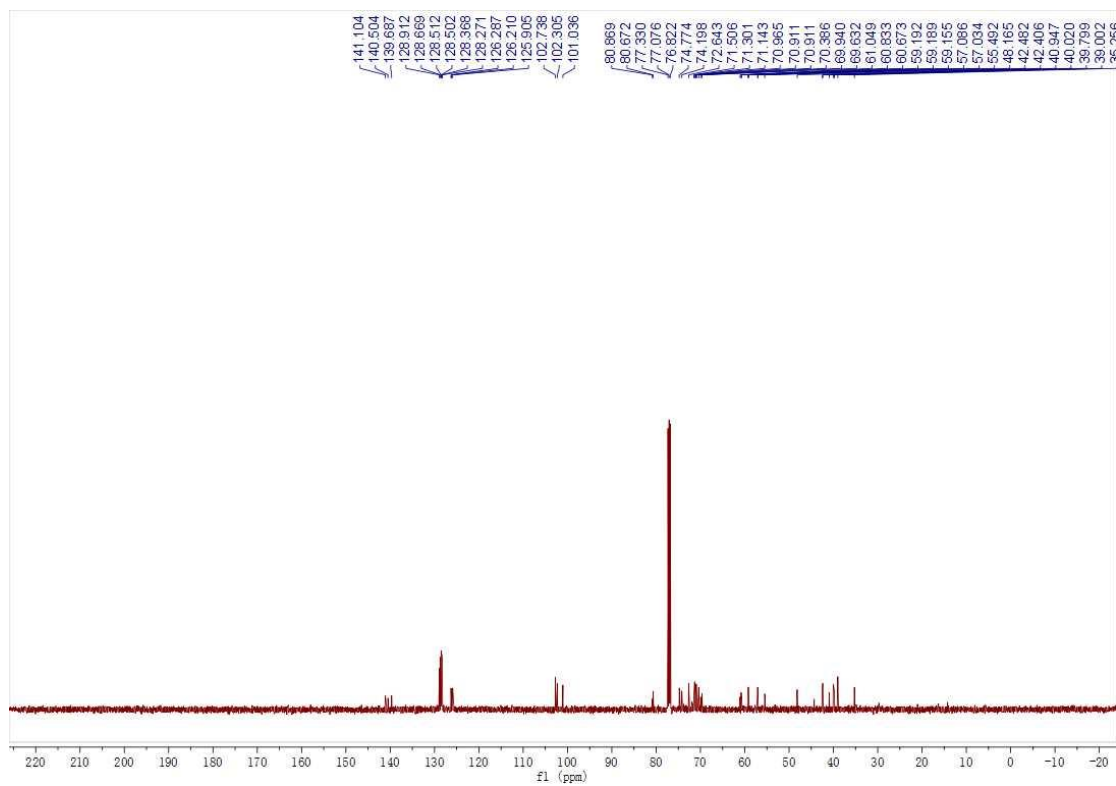

(26)

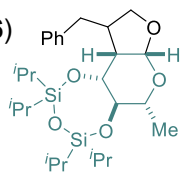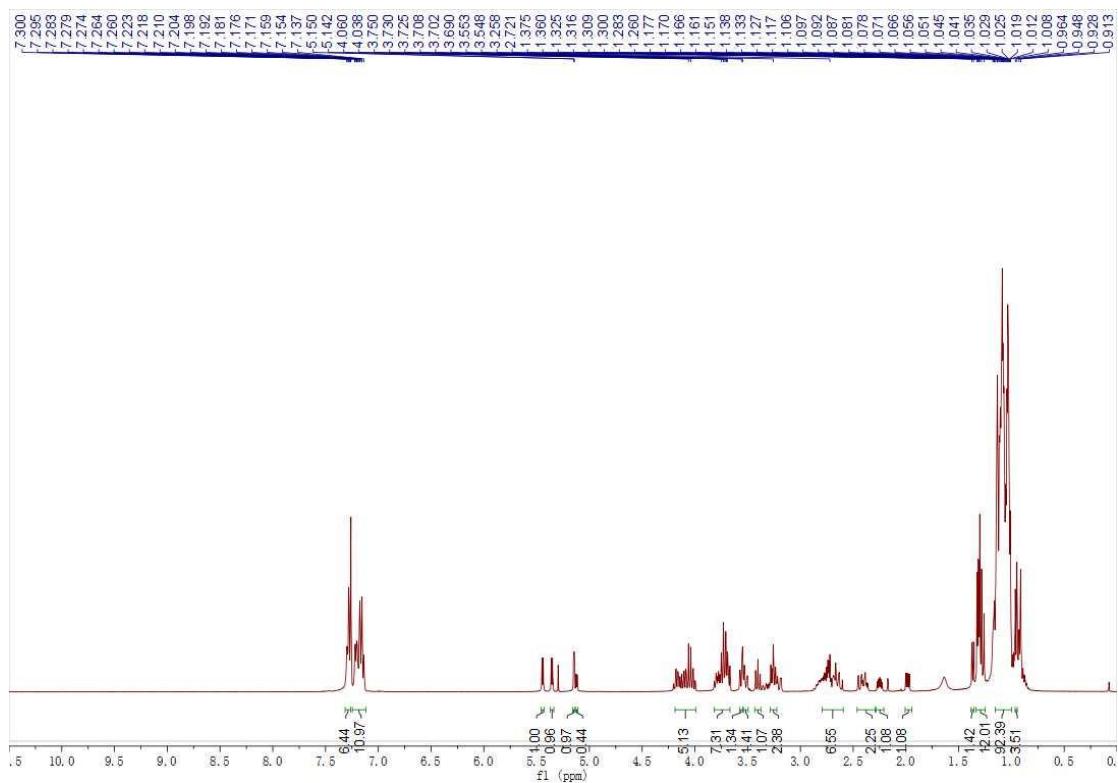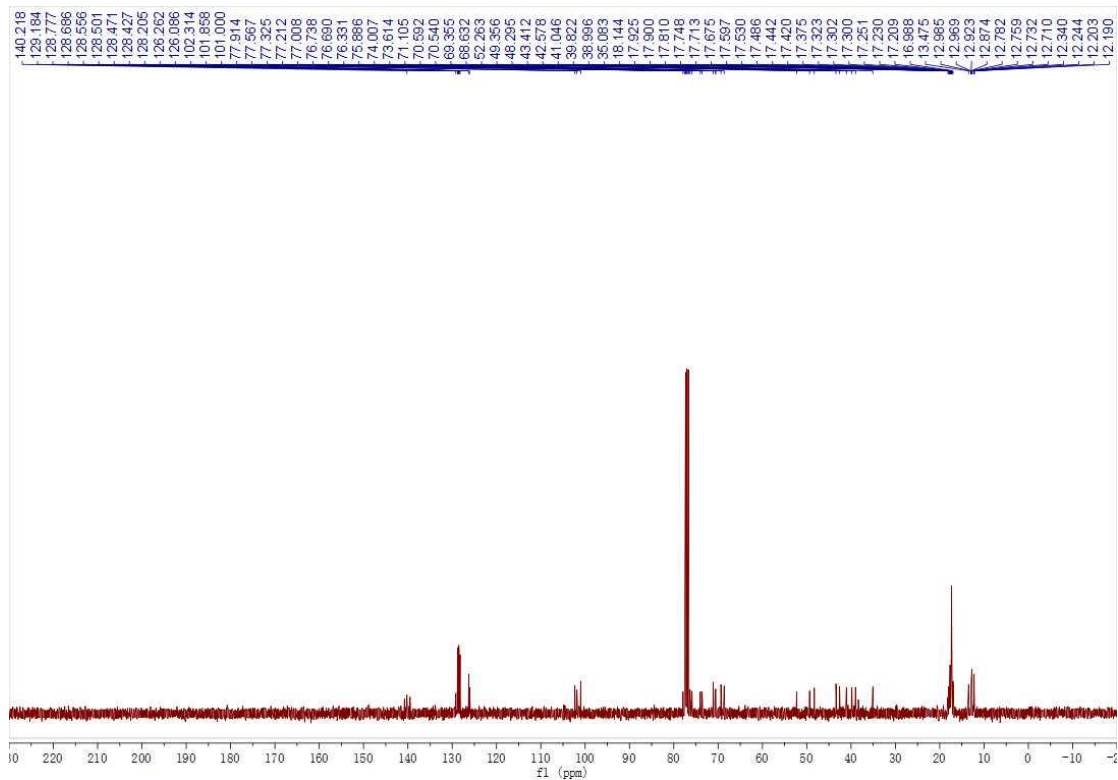

(27)

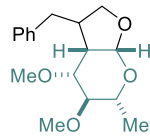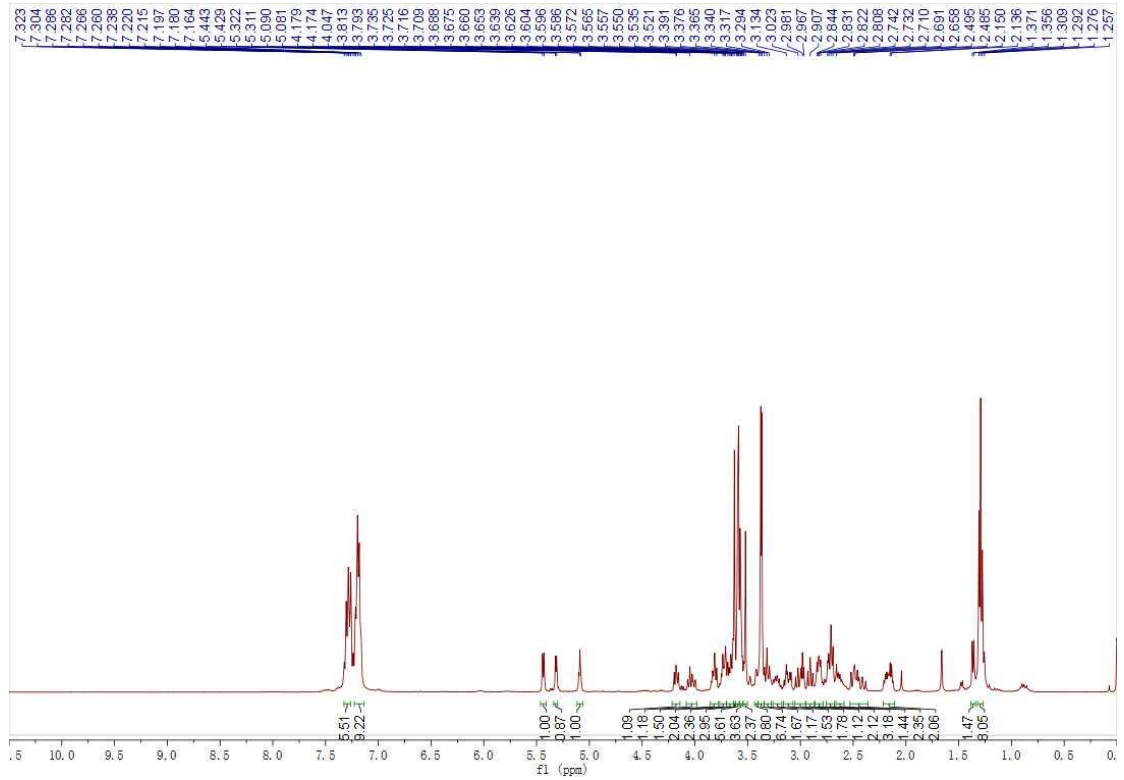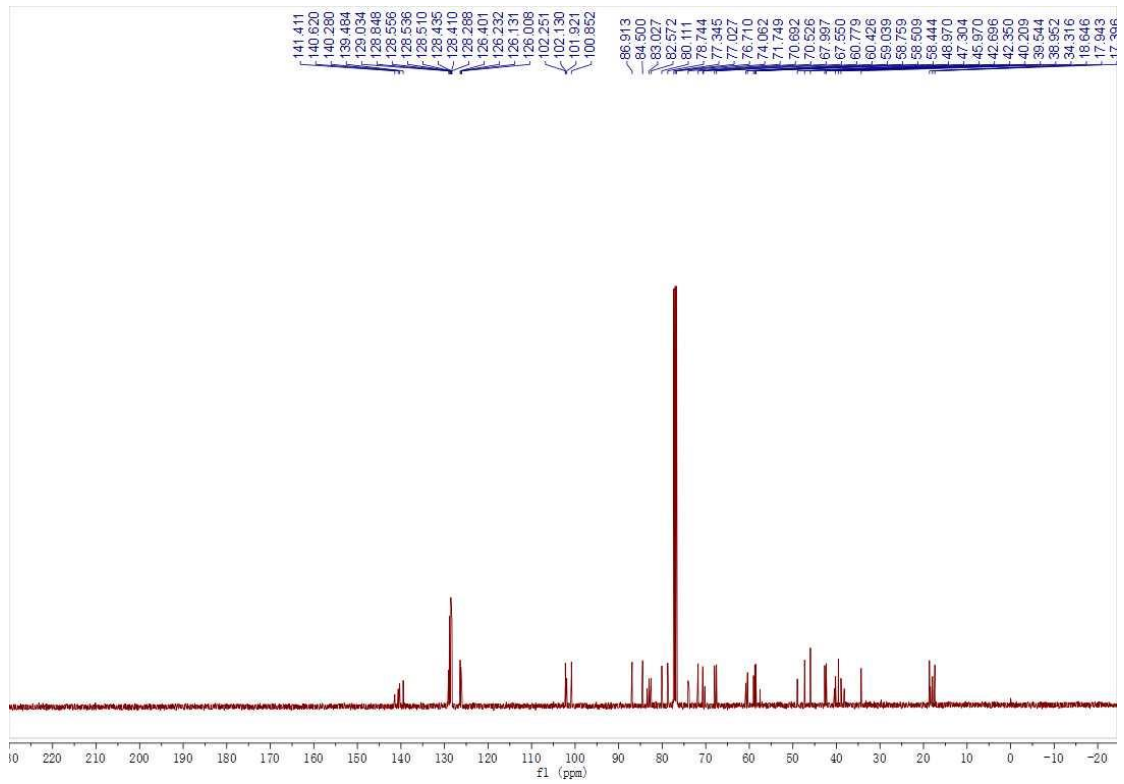

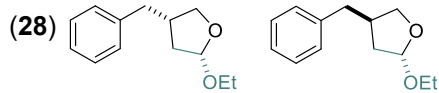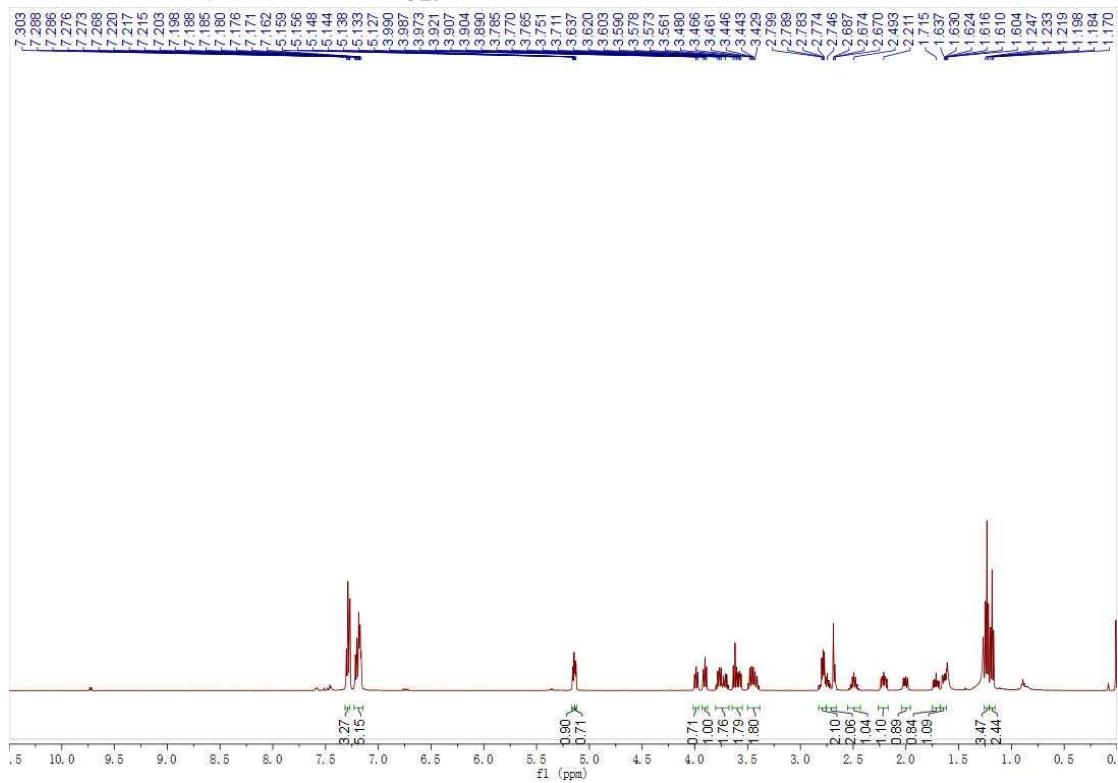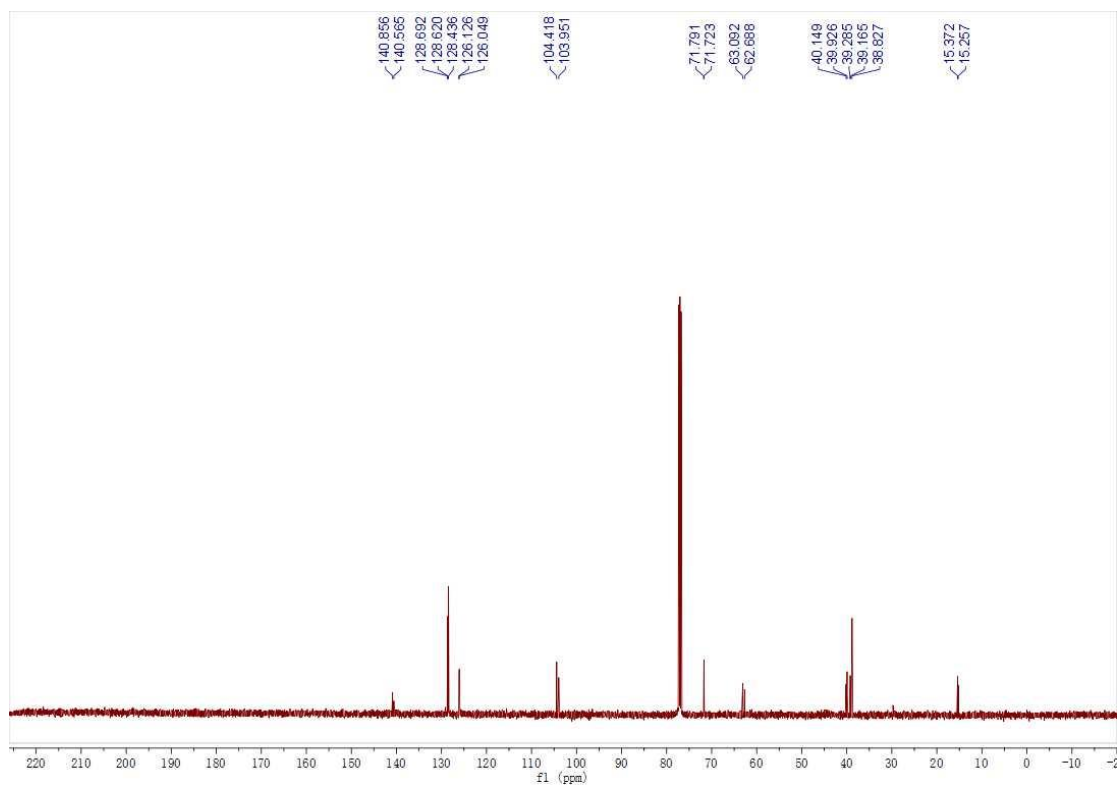



(29)

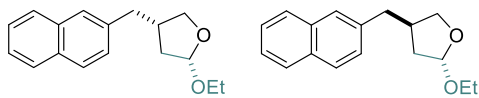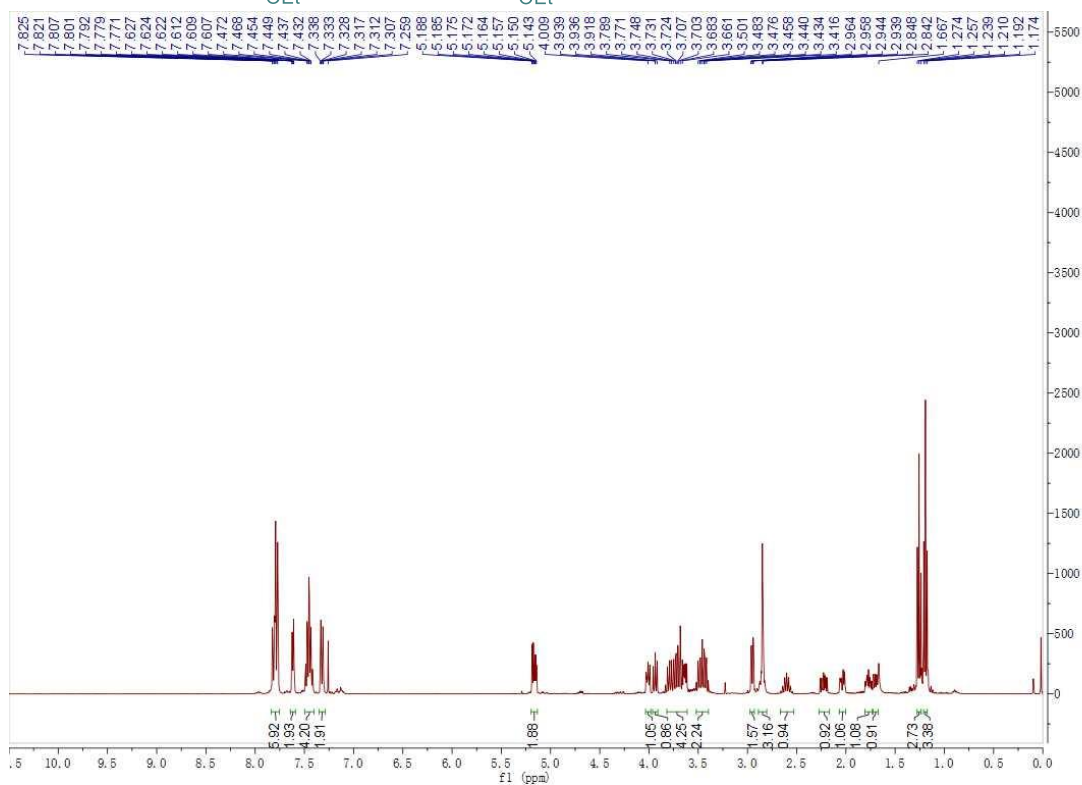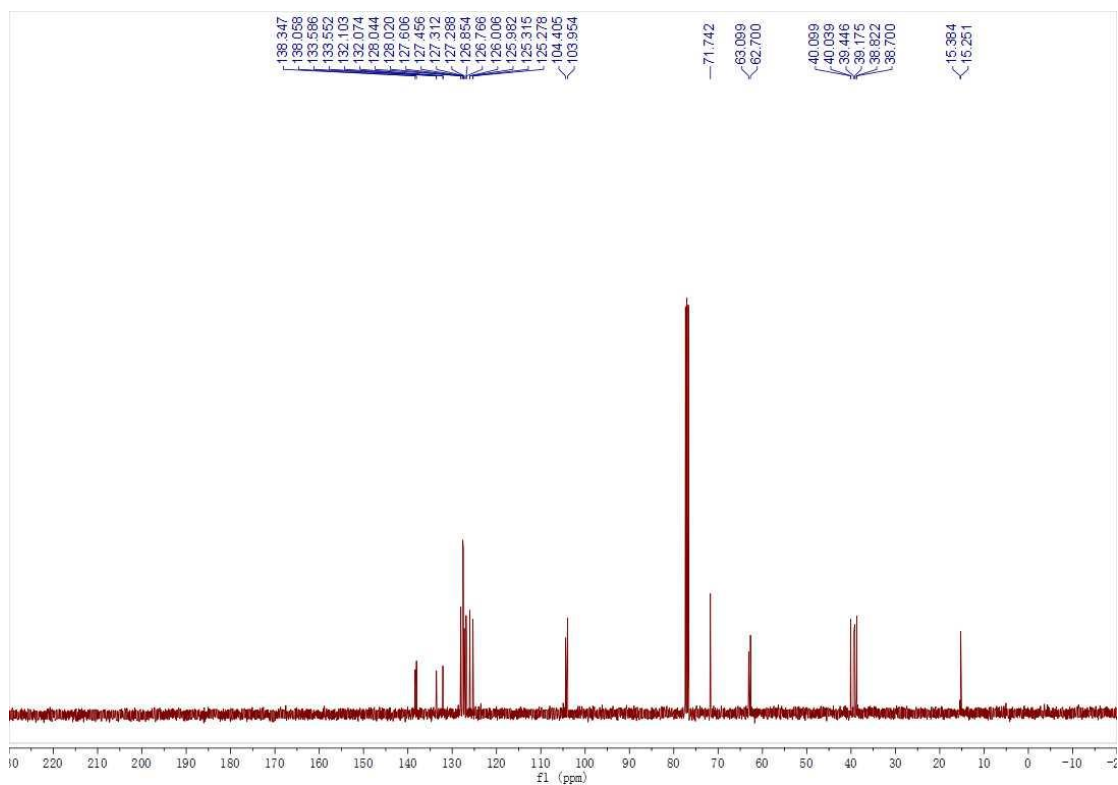

(30)

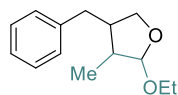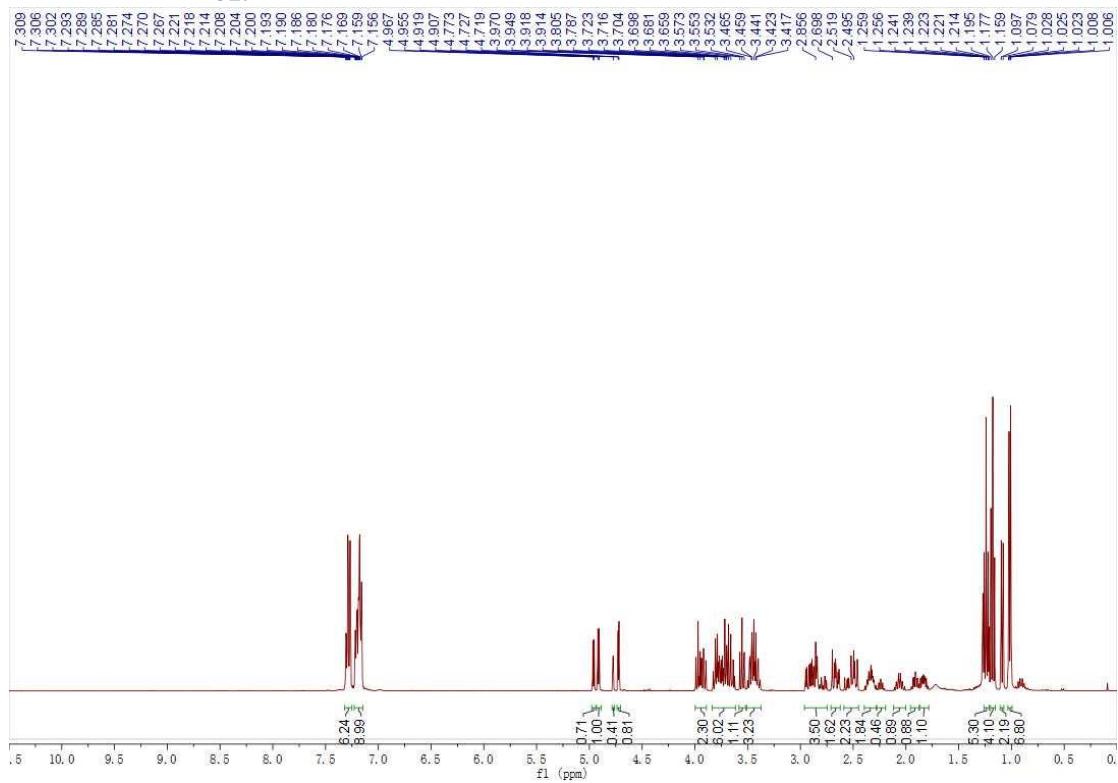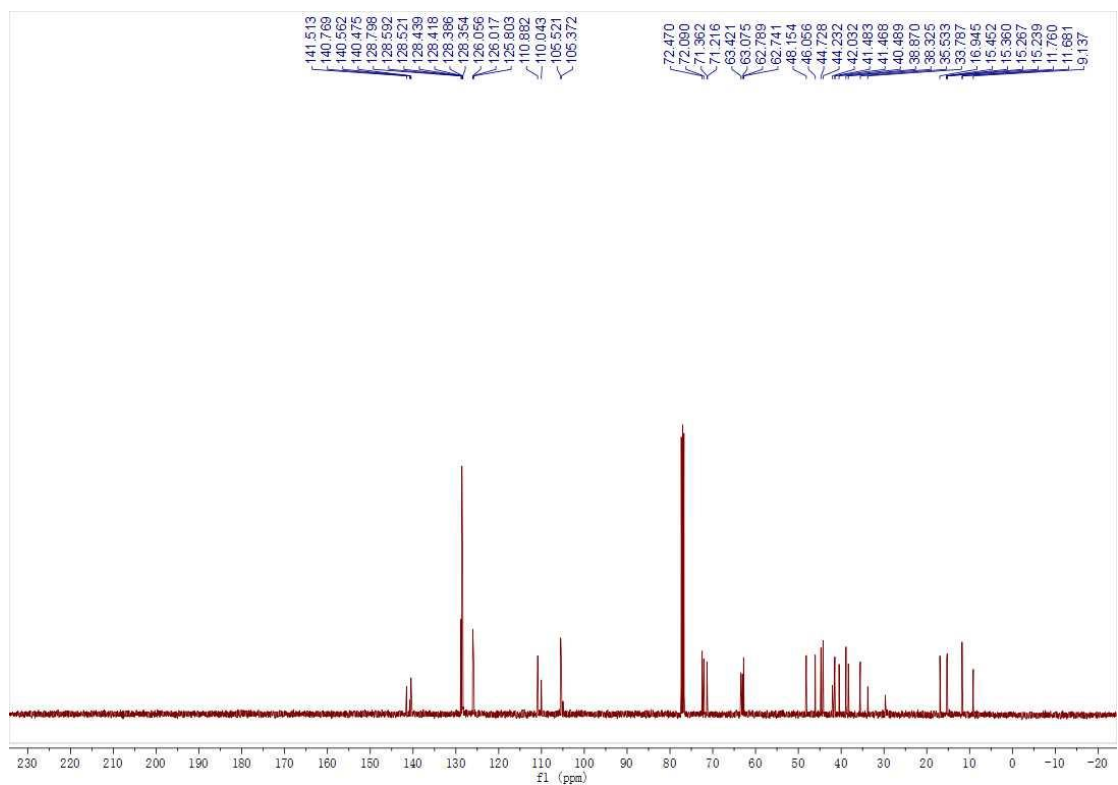

(31)

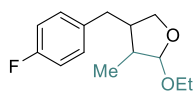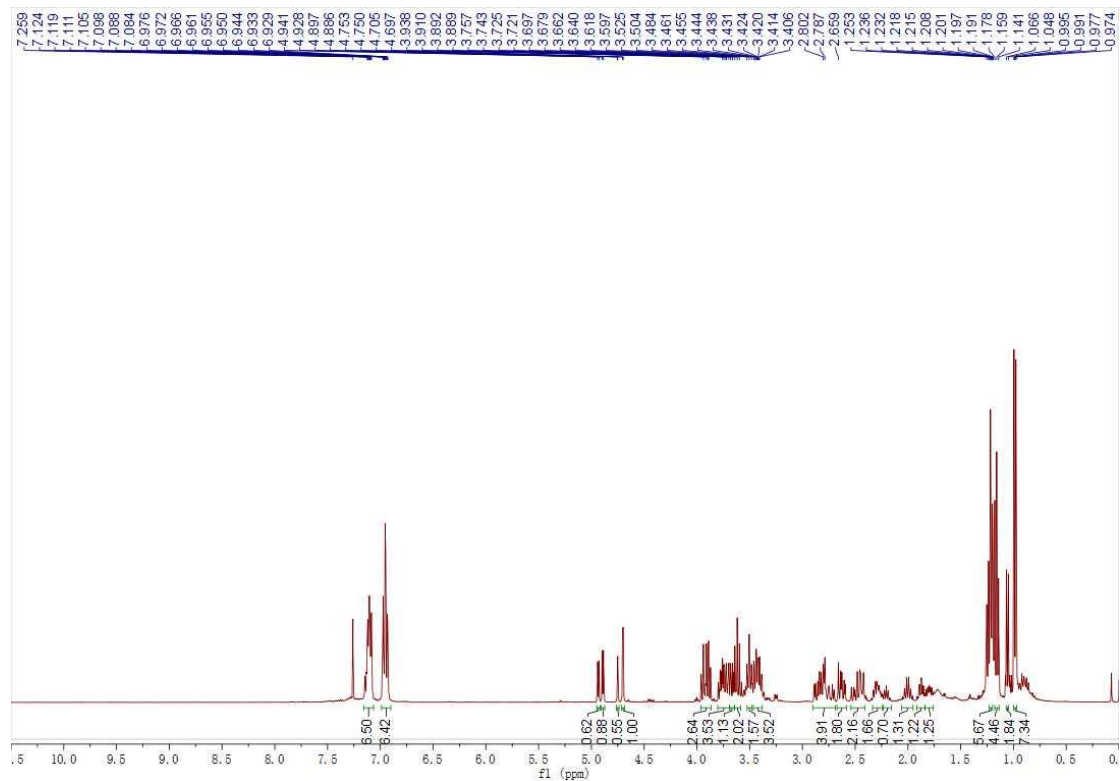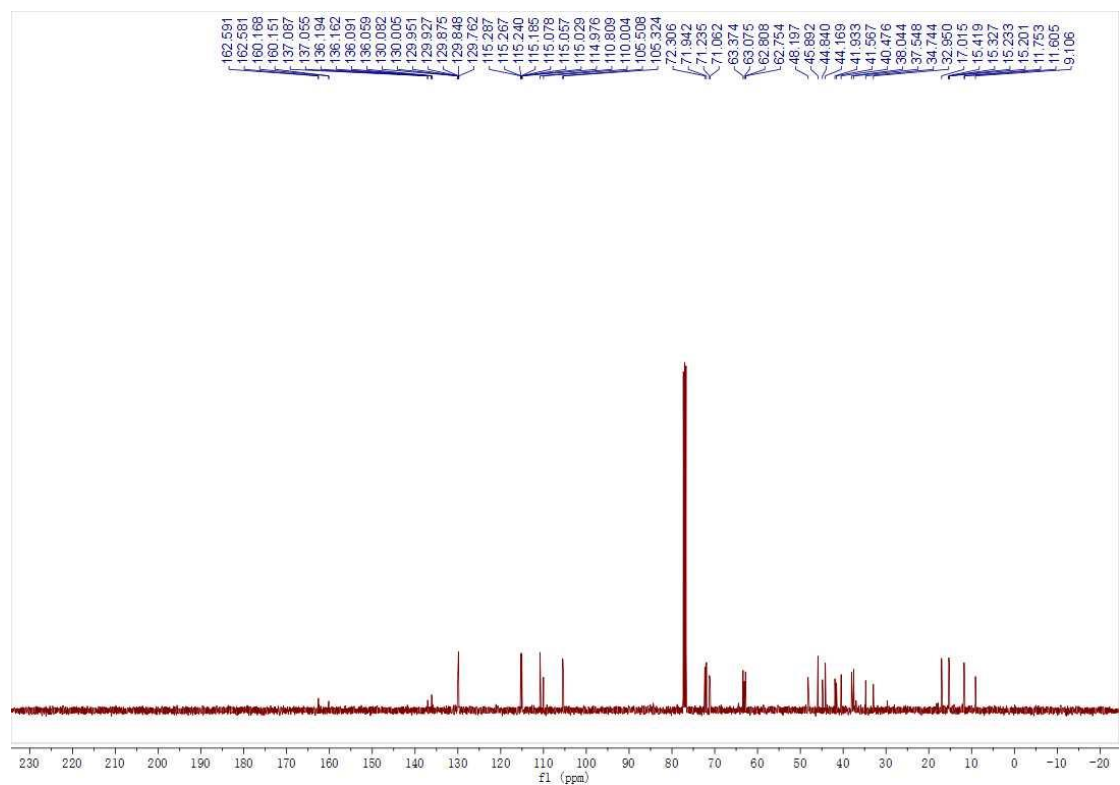

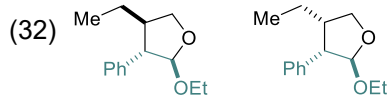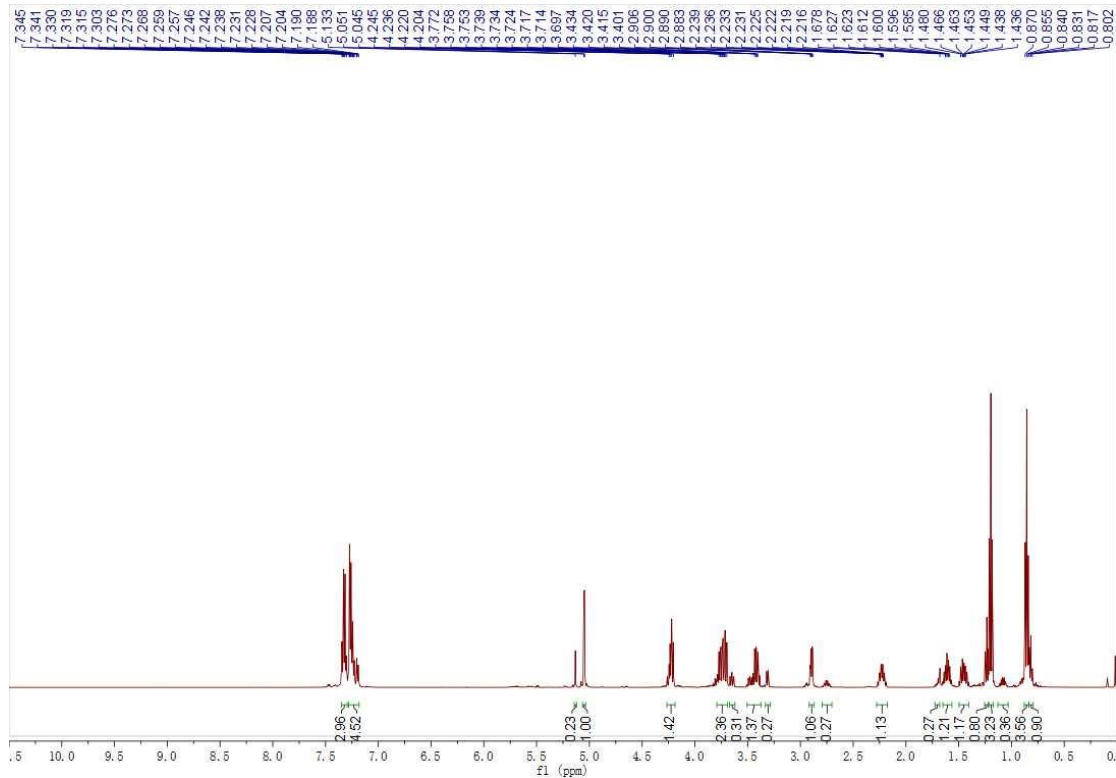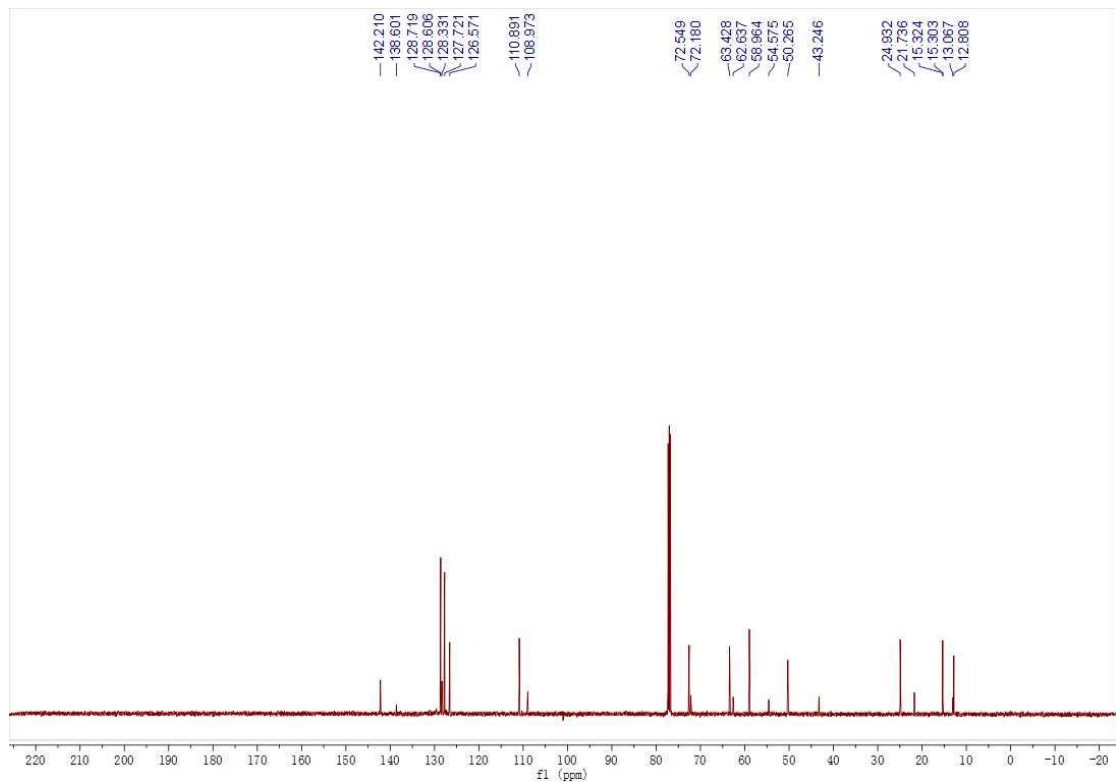

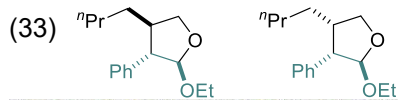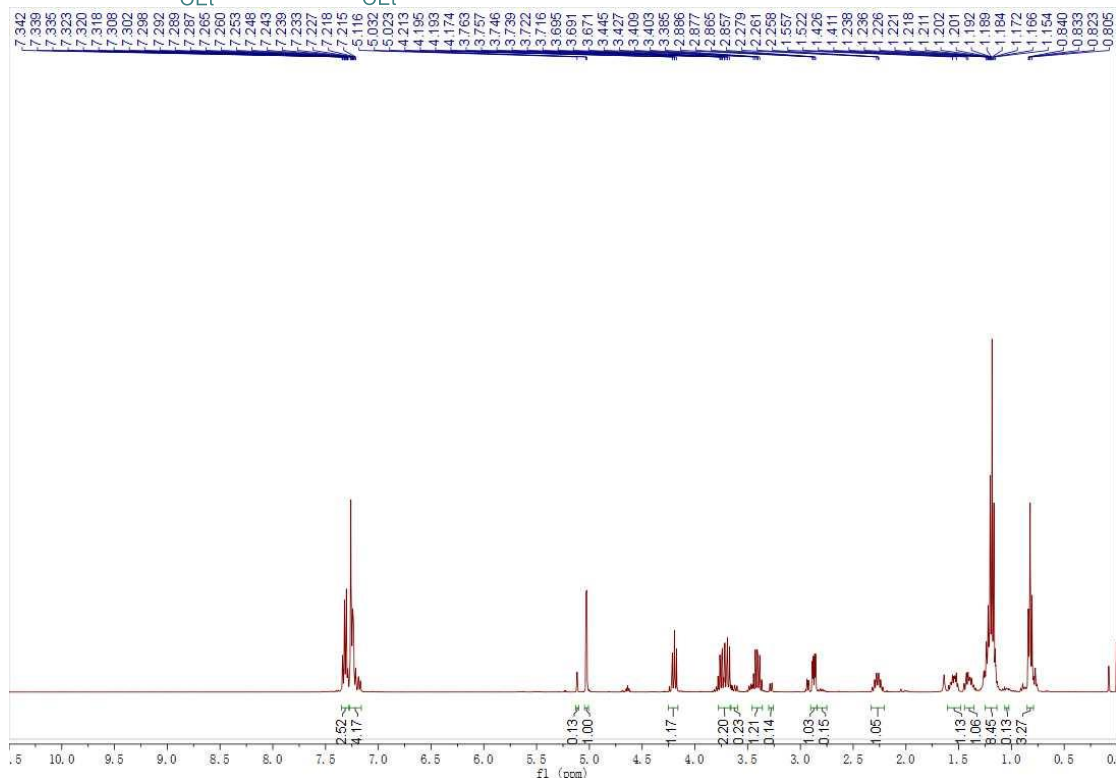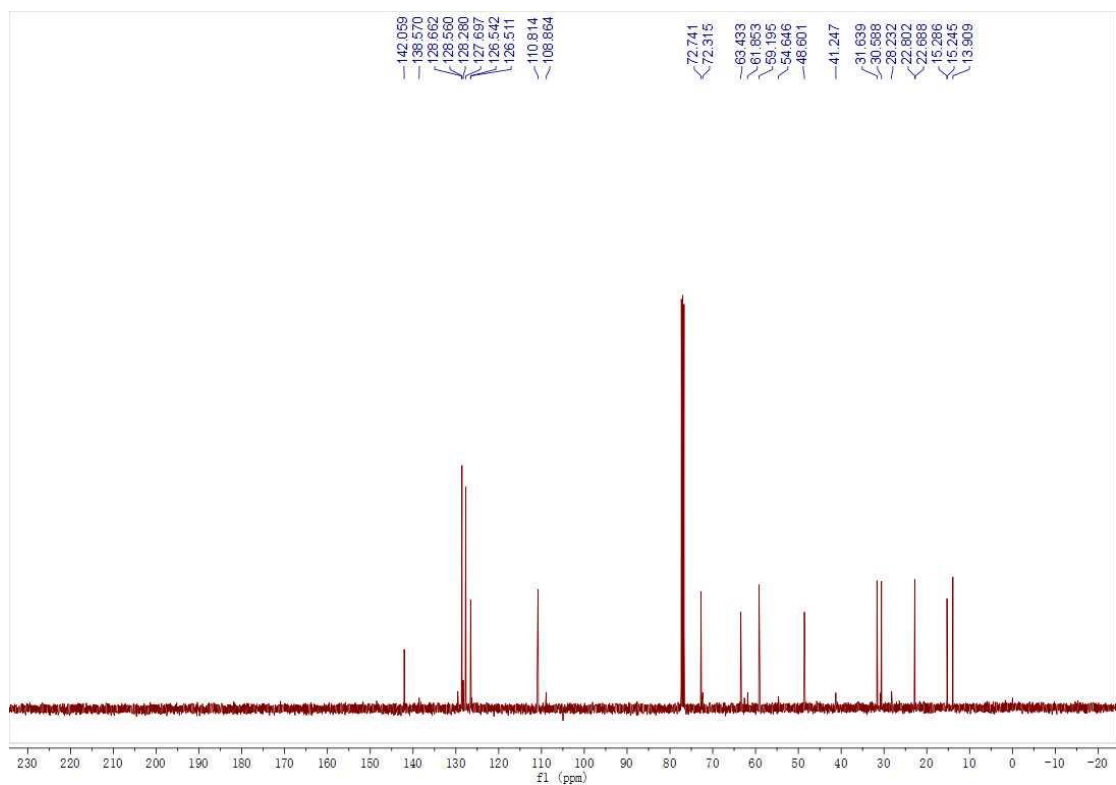

(34)

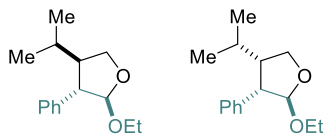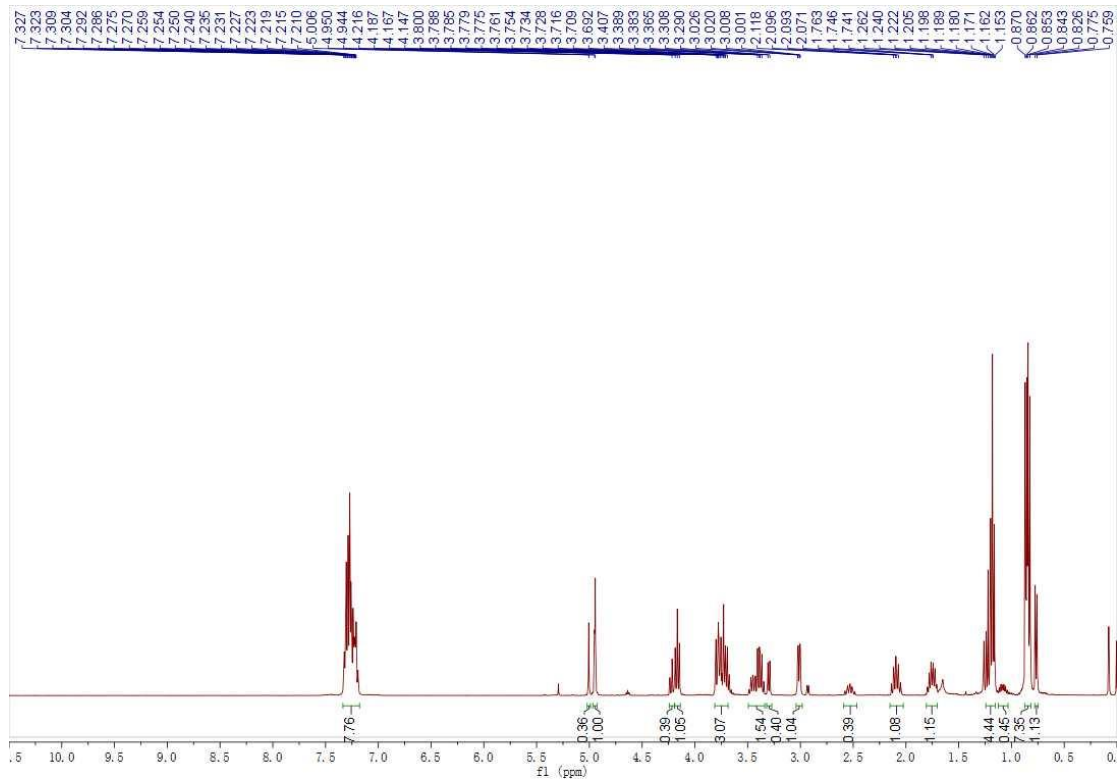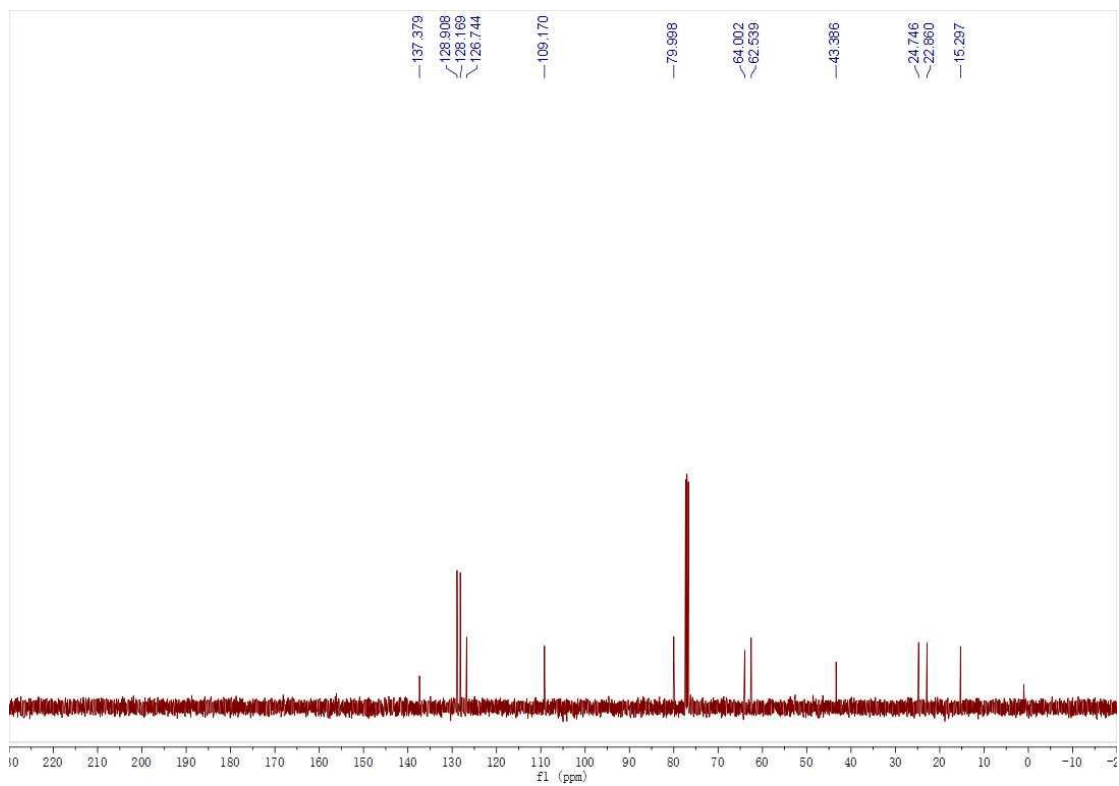

(35)

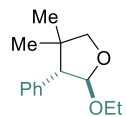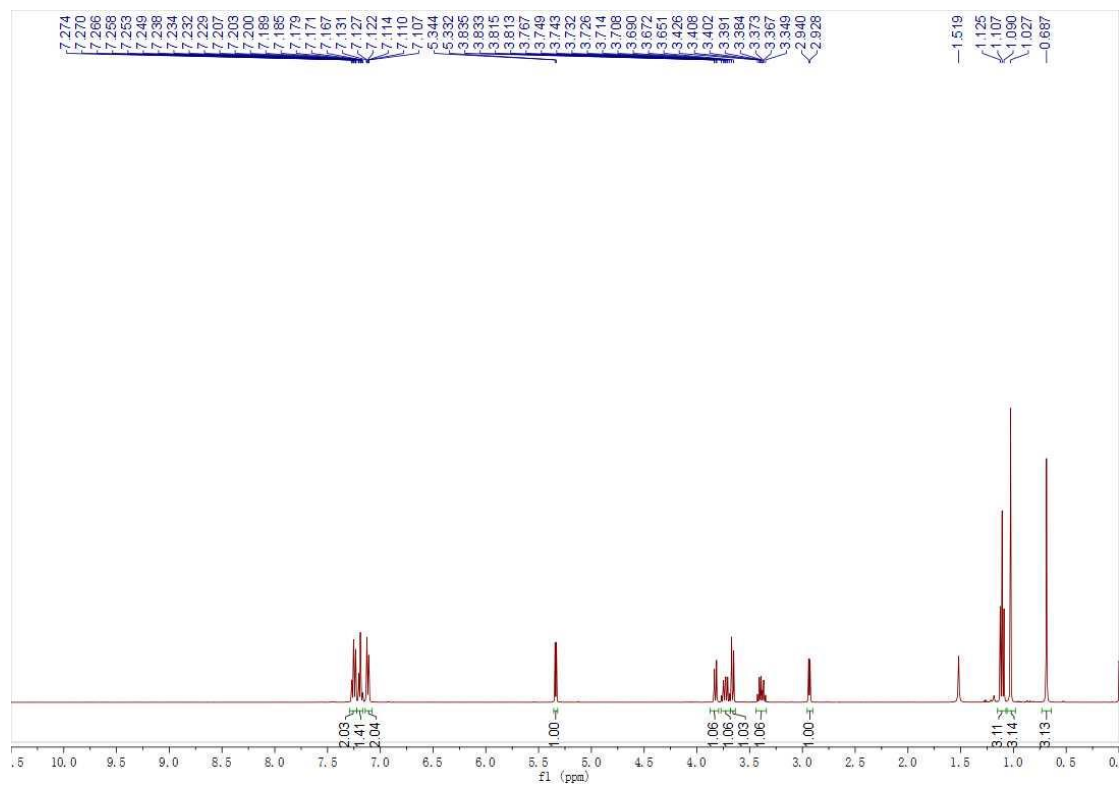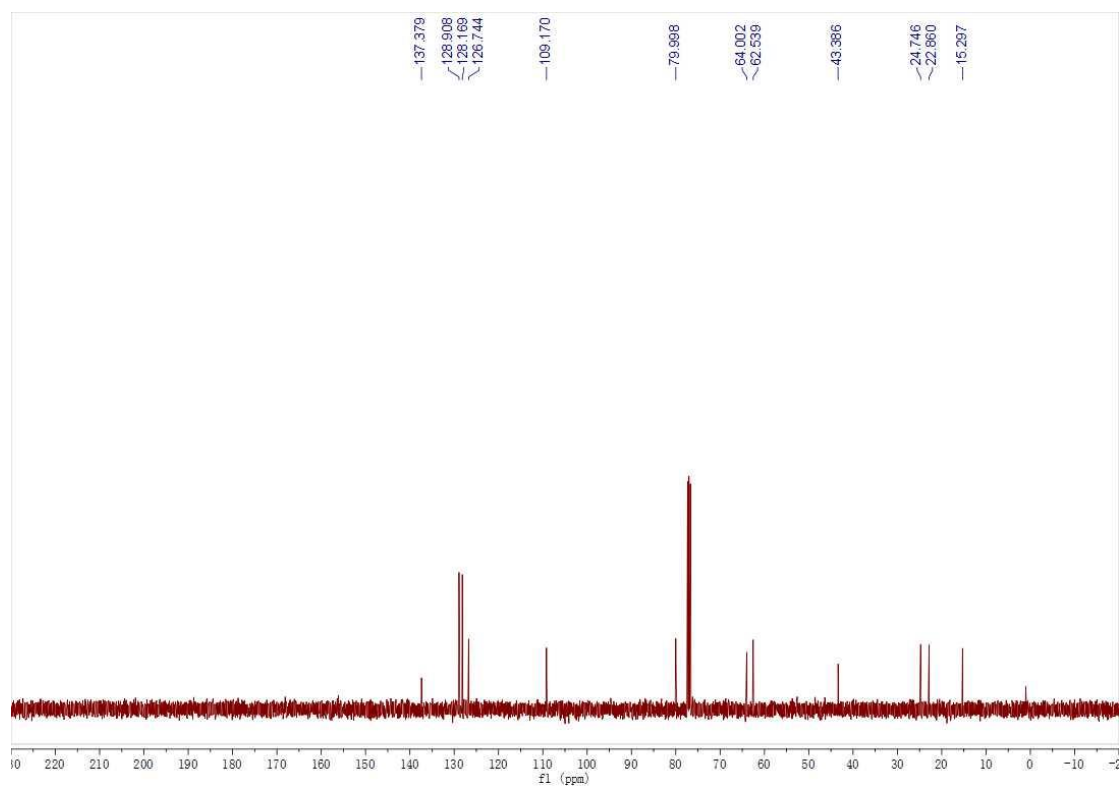

(36)

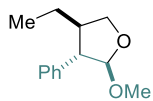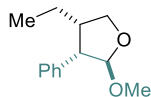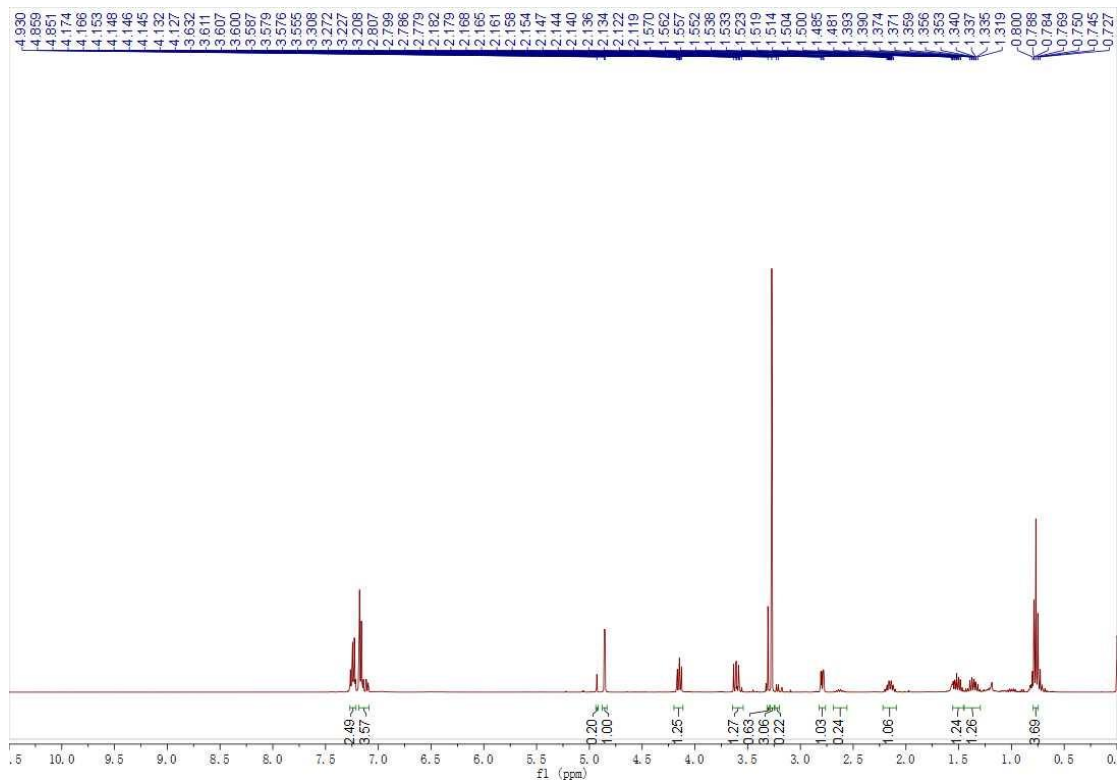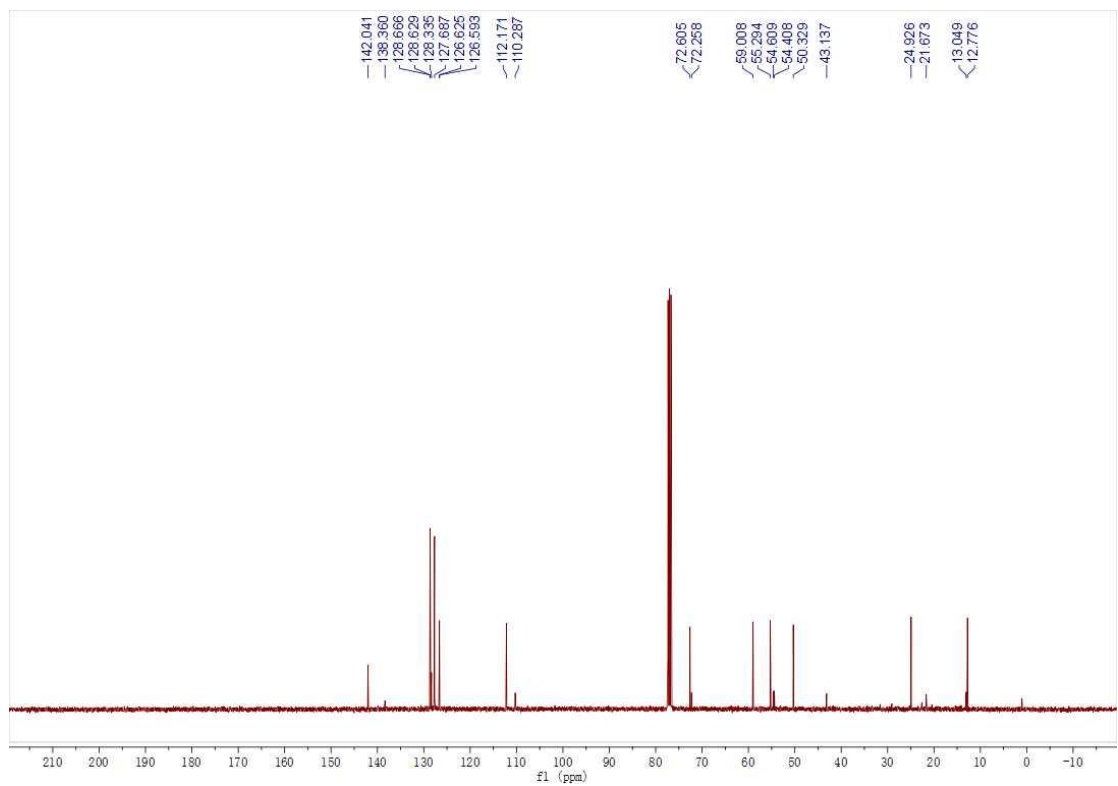



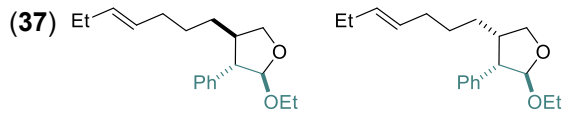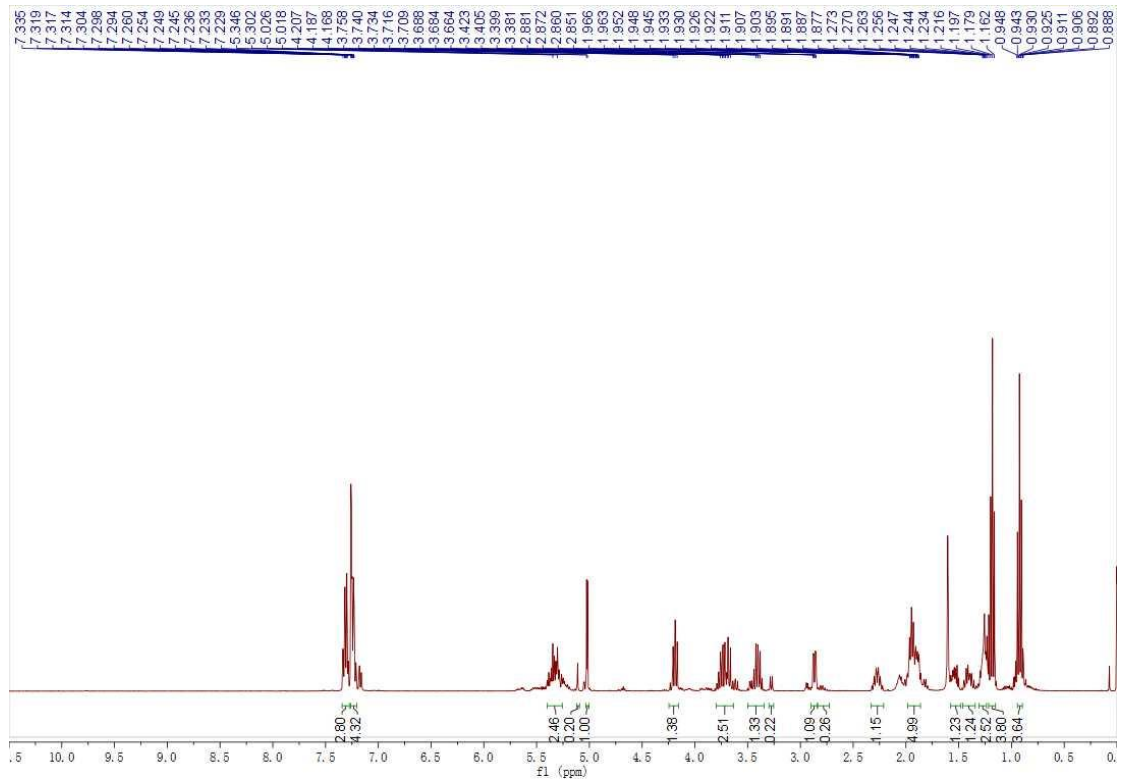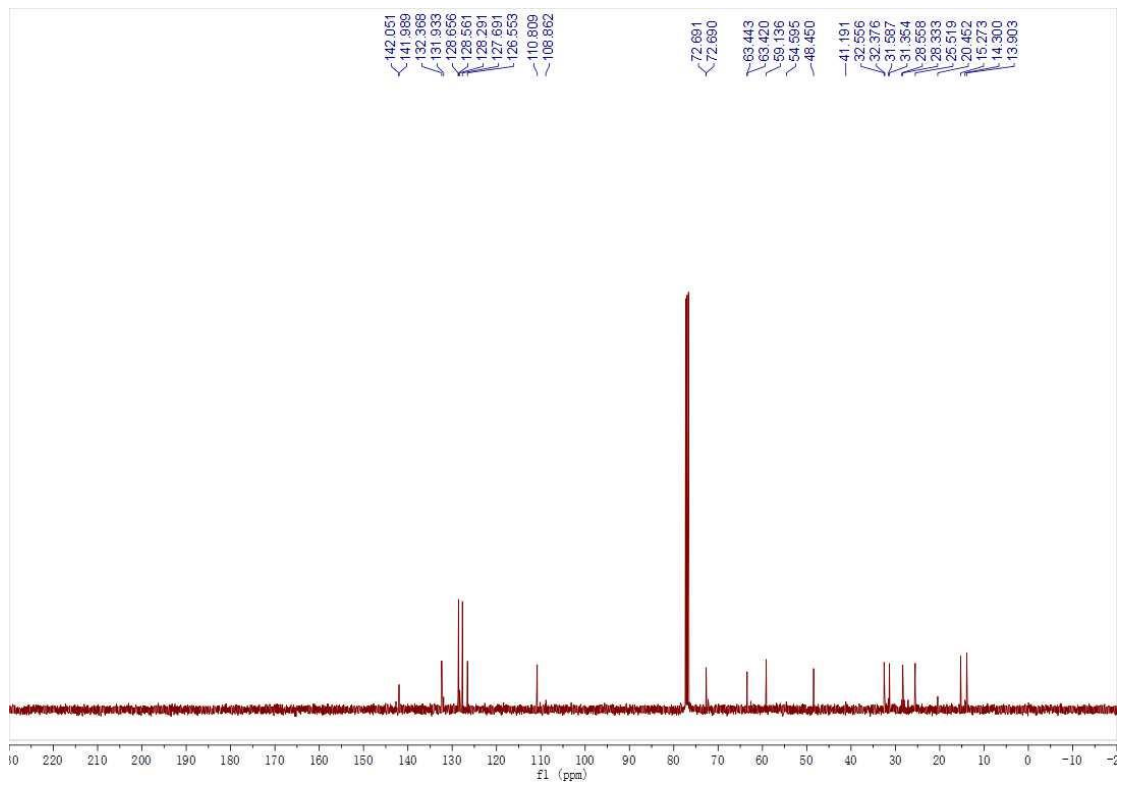

(38)

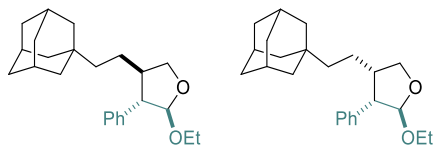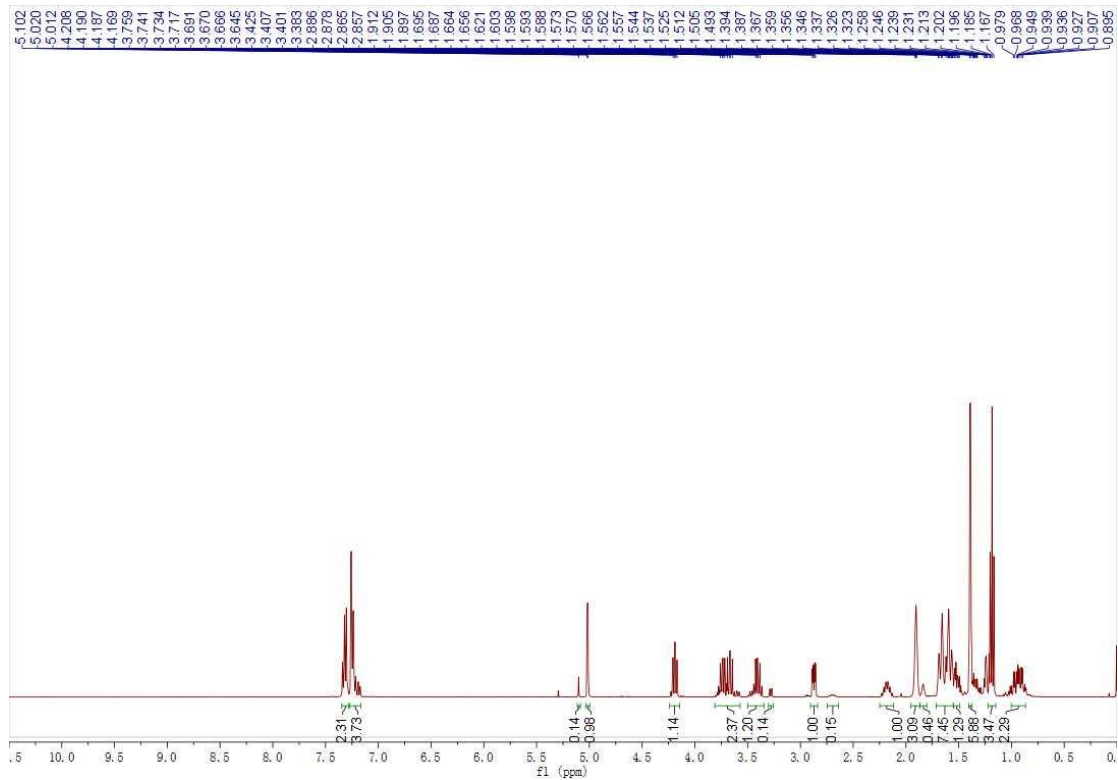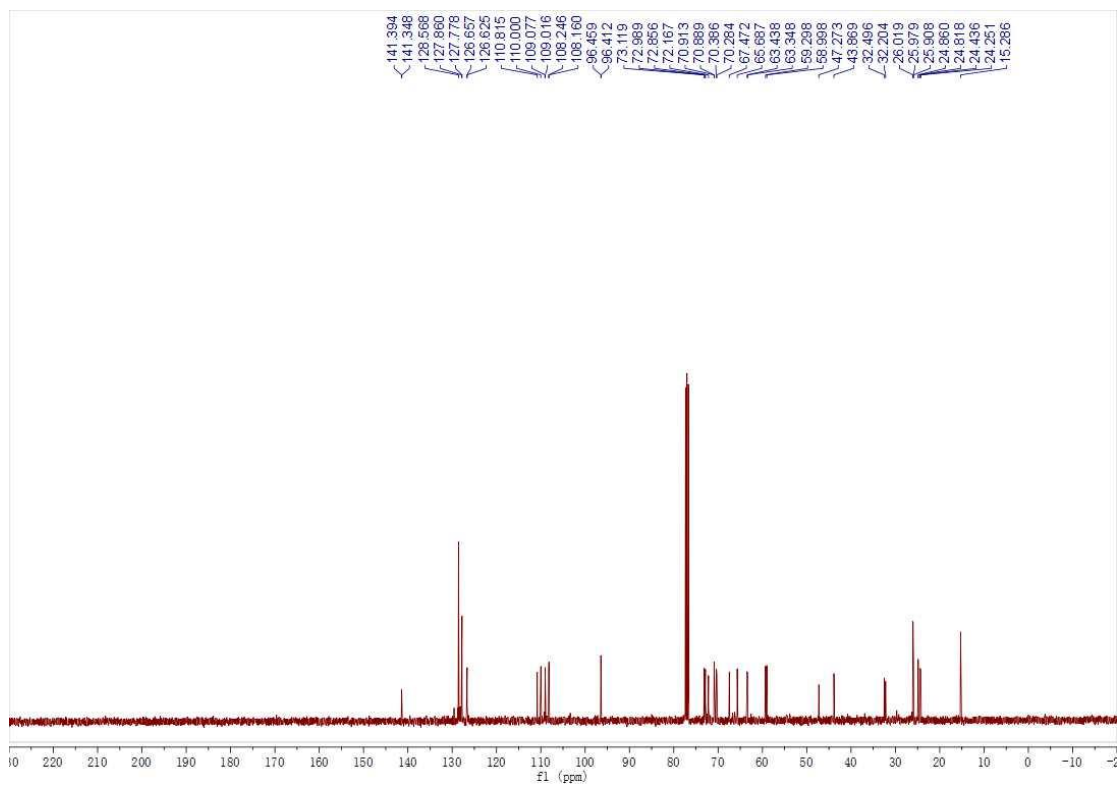

(39)

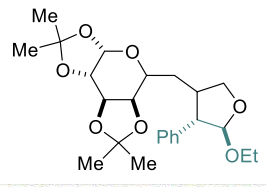

(from **Z-SM**, dr = 2.6:2:1)

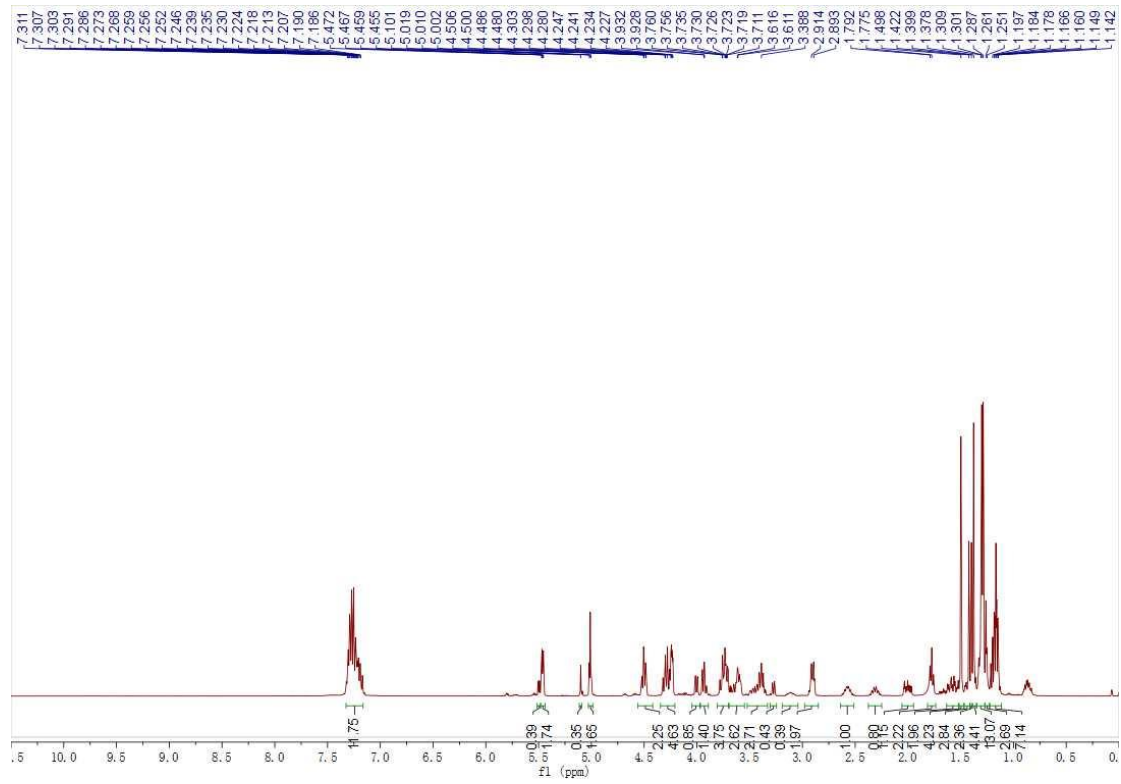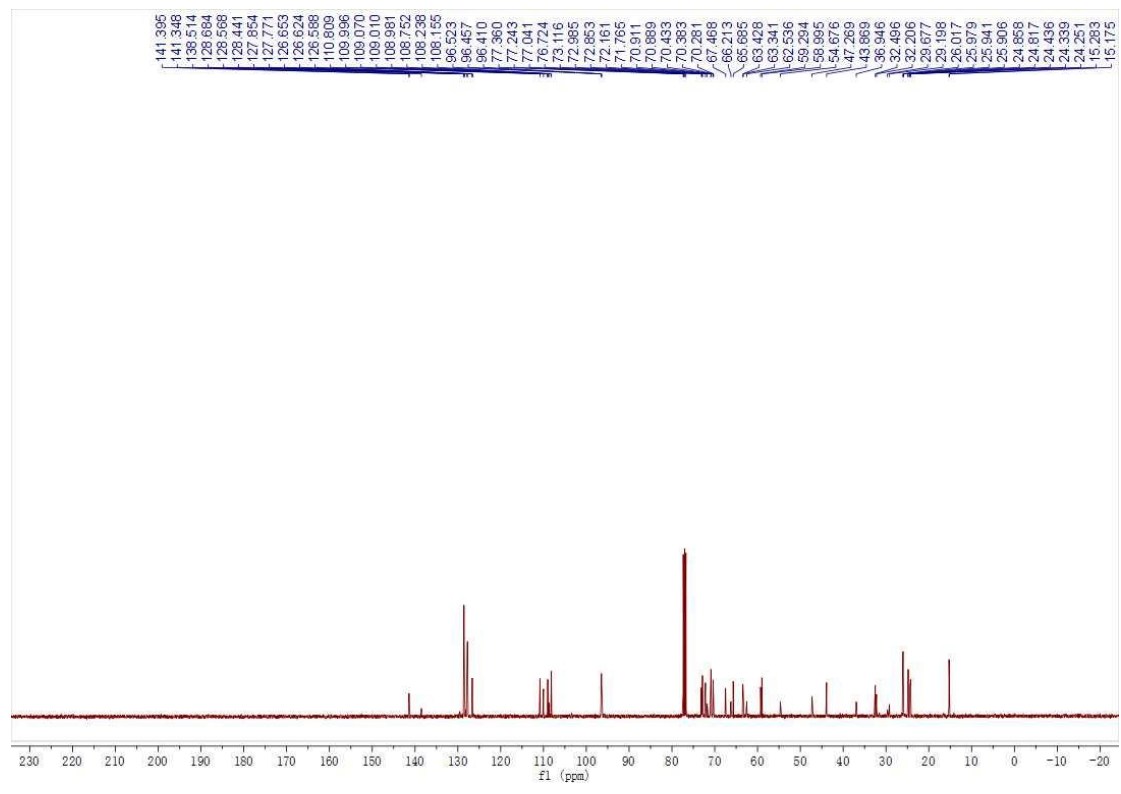

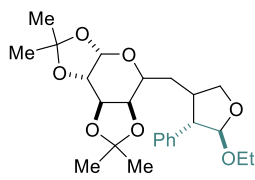

(from E-SM, dr = 1.1:1)

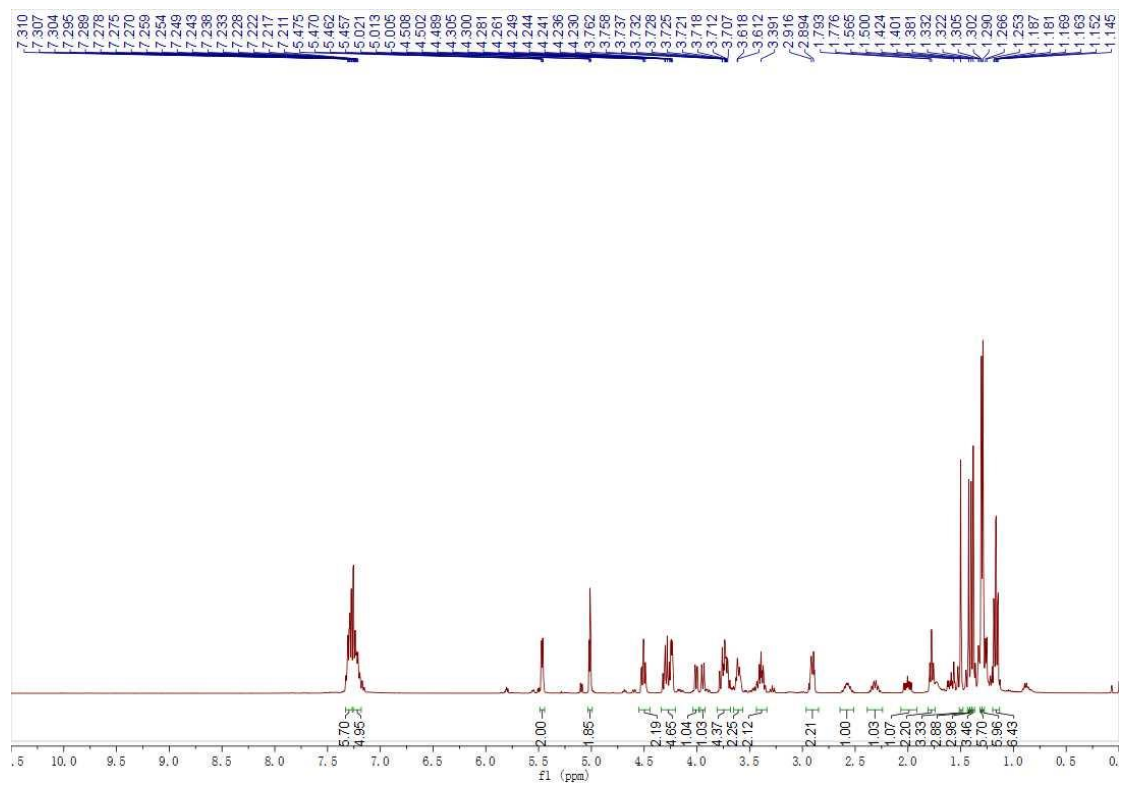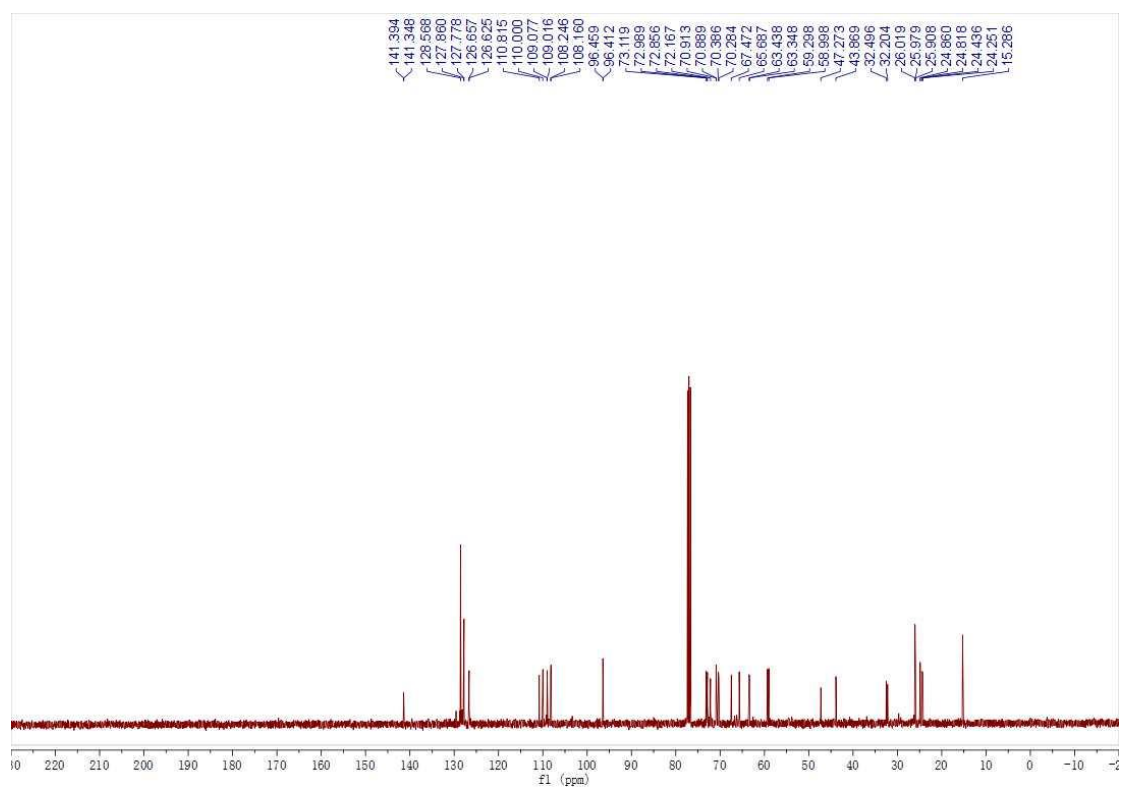

(40)

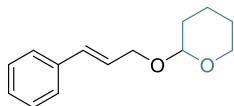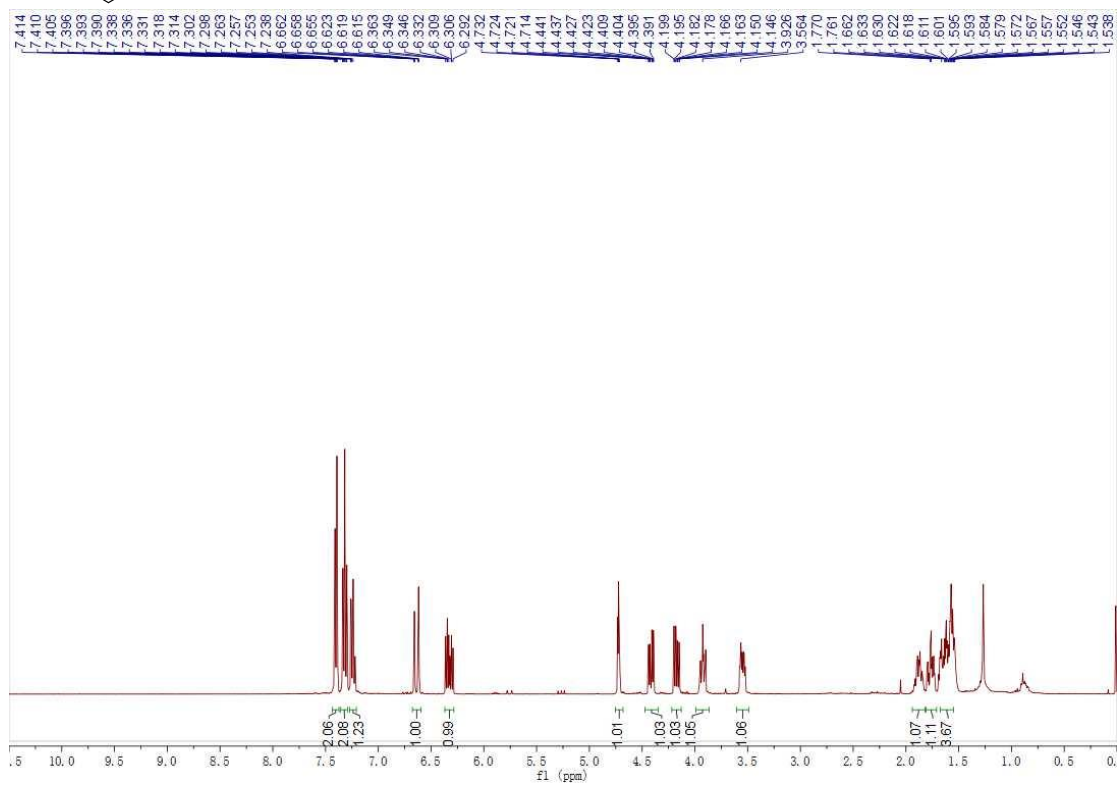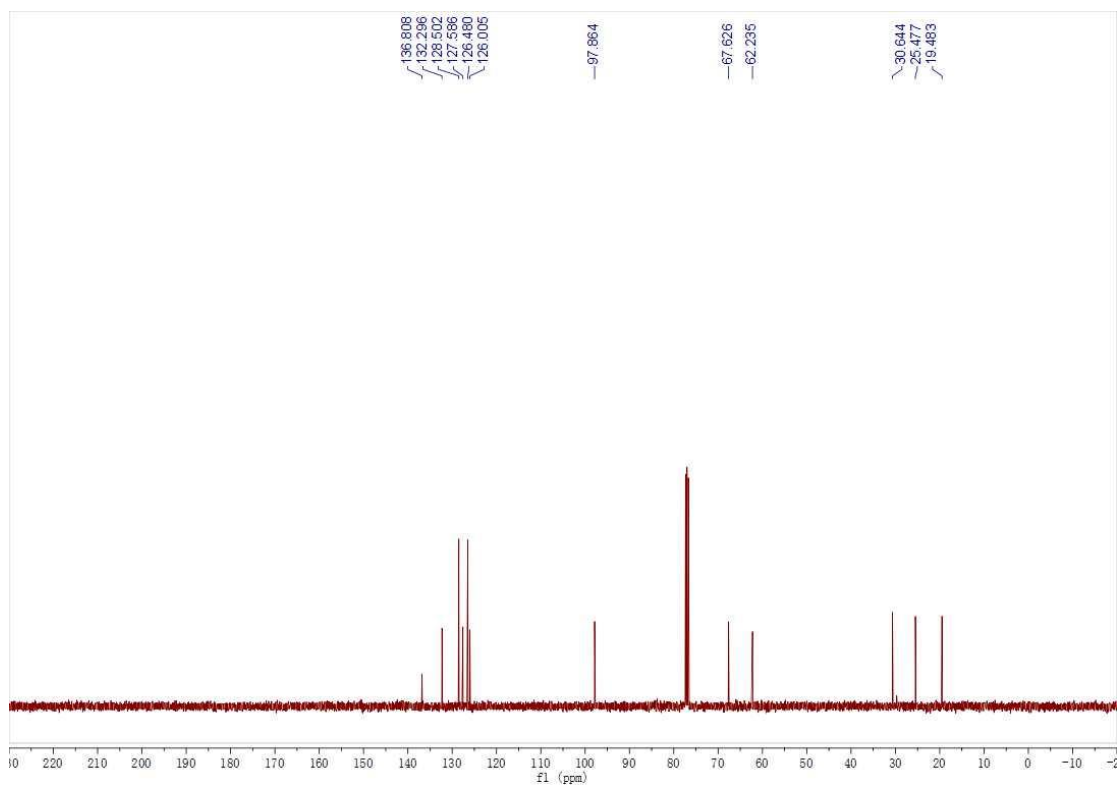

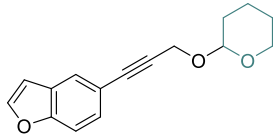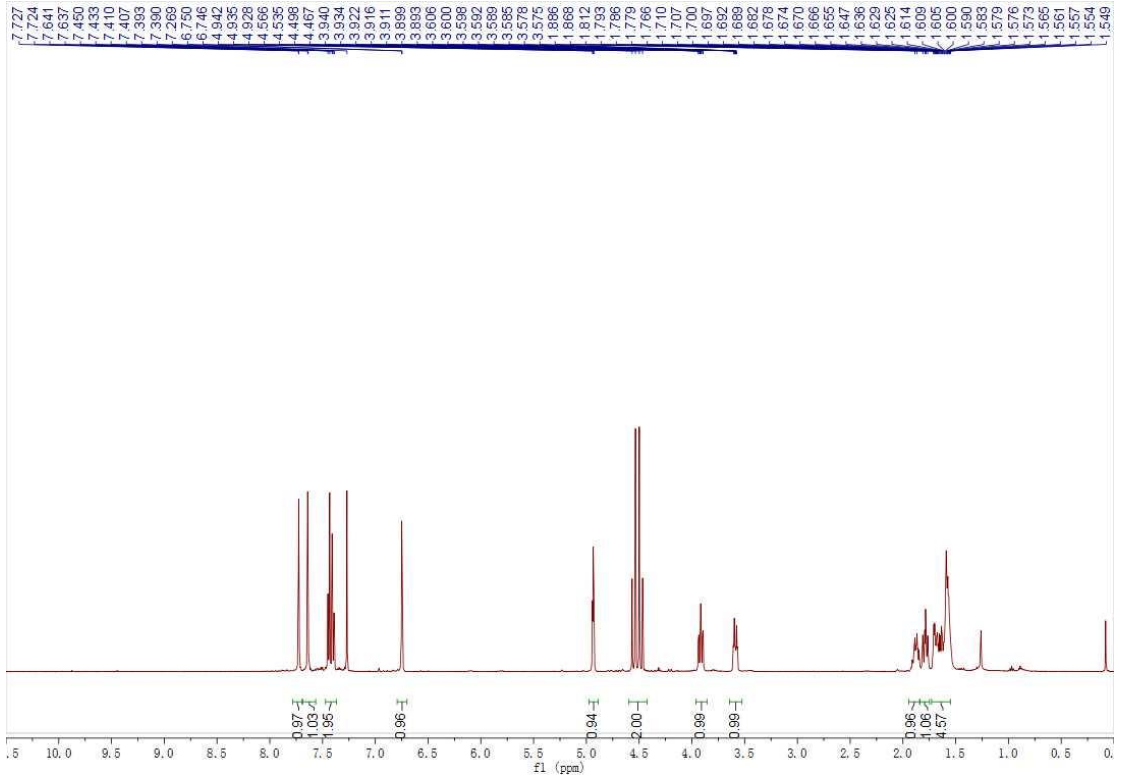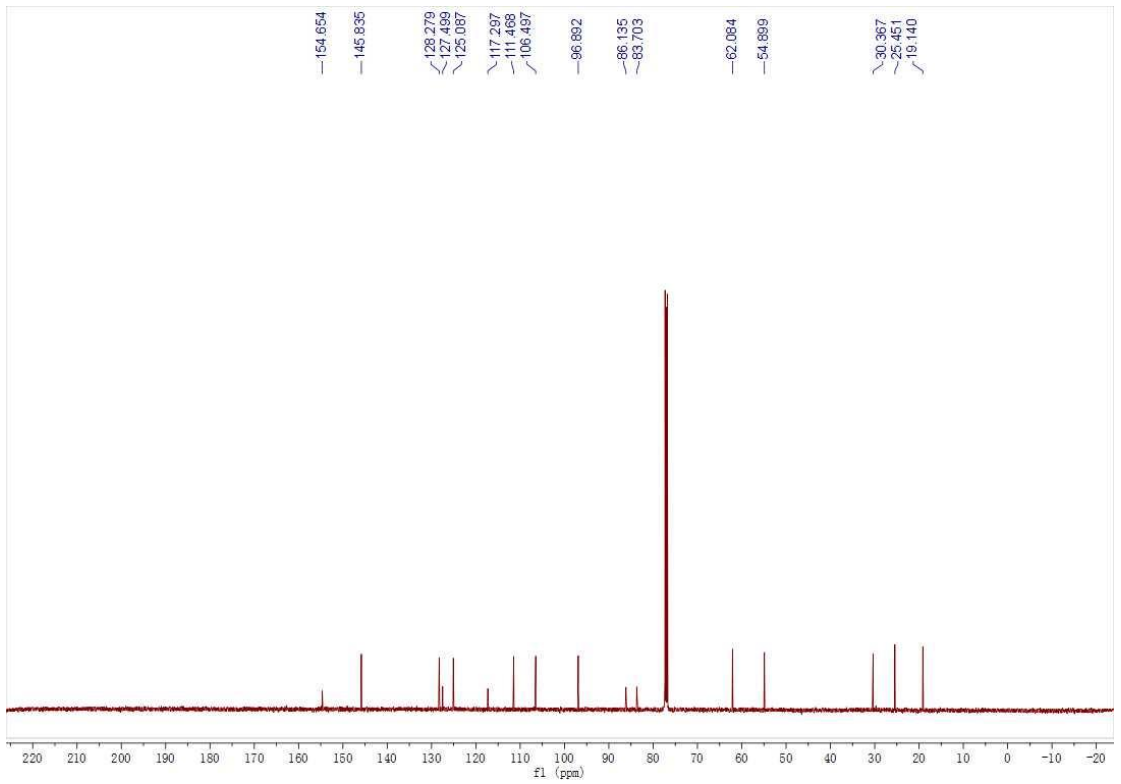

# H<sup>1</sup>-H<sup>1</sup> COSY and H<sup>1</sup>-H<sup>1</sup> 2D-NOESY NMR spectra of product 1

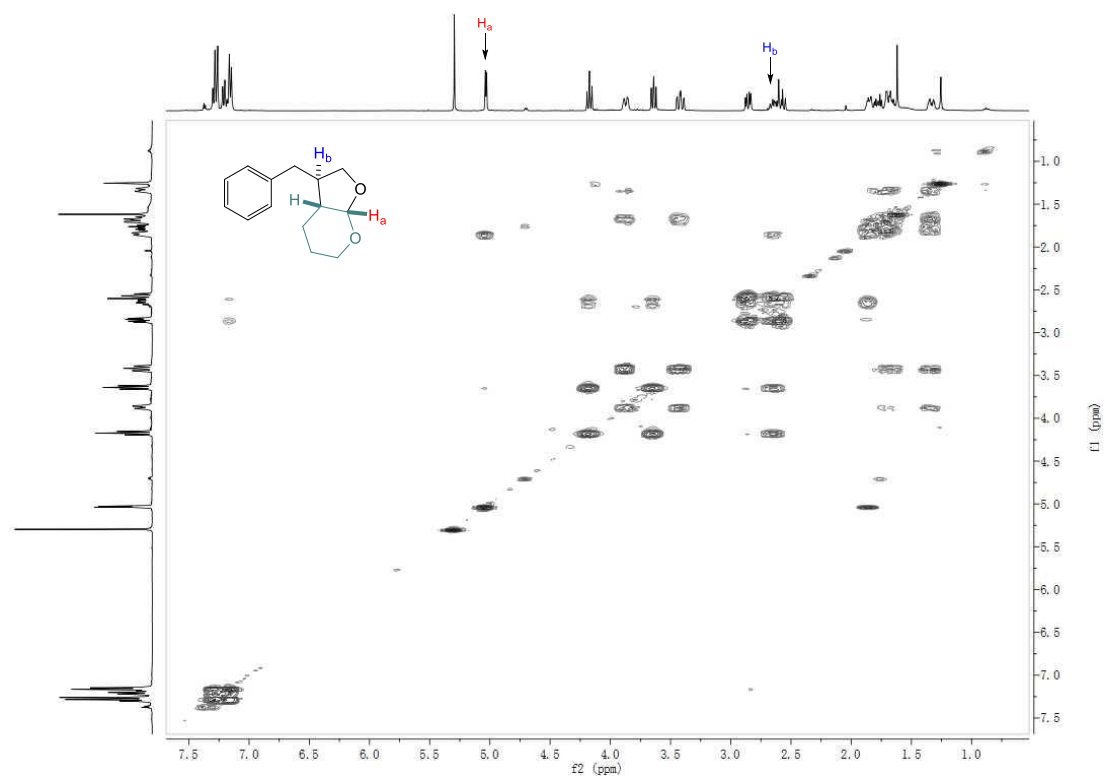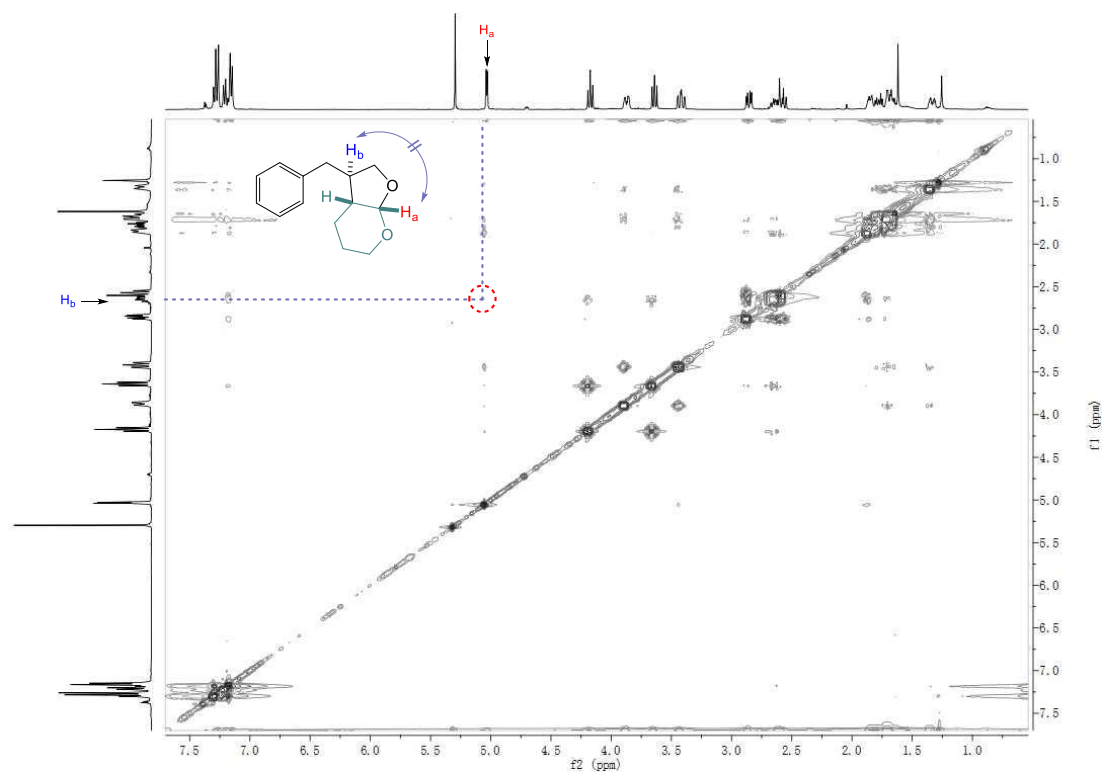

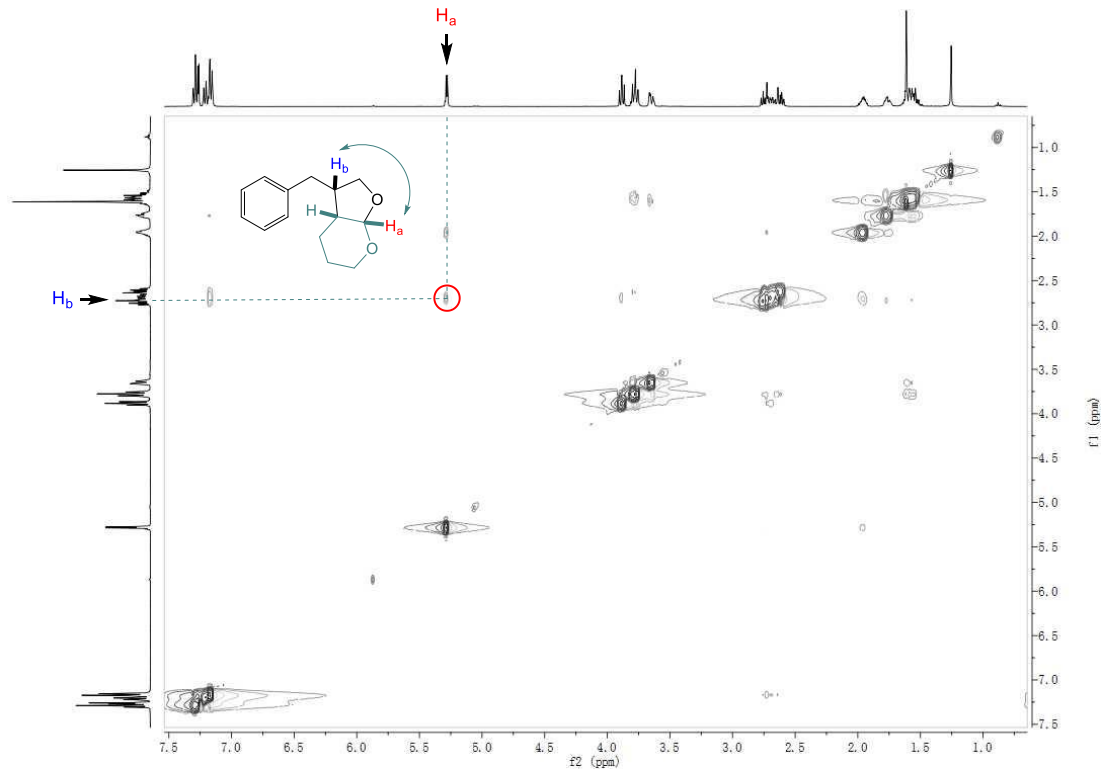



H<sup>1</sup>-H<sup>1</sup> COSY and H<sup>1</sup>-H<sup>1</sup> 2D-NOESY NMR spectra of compound **18**

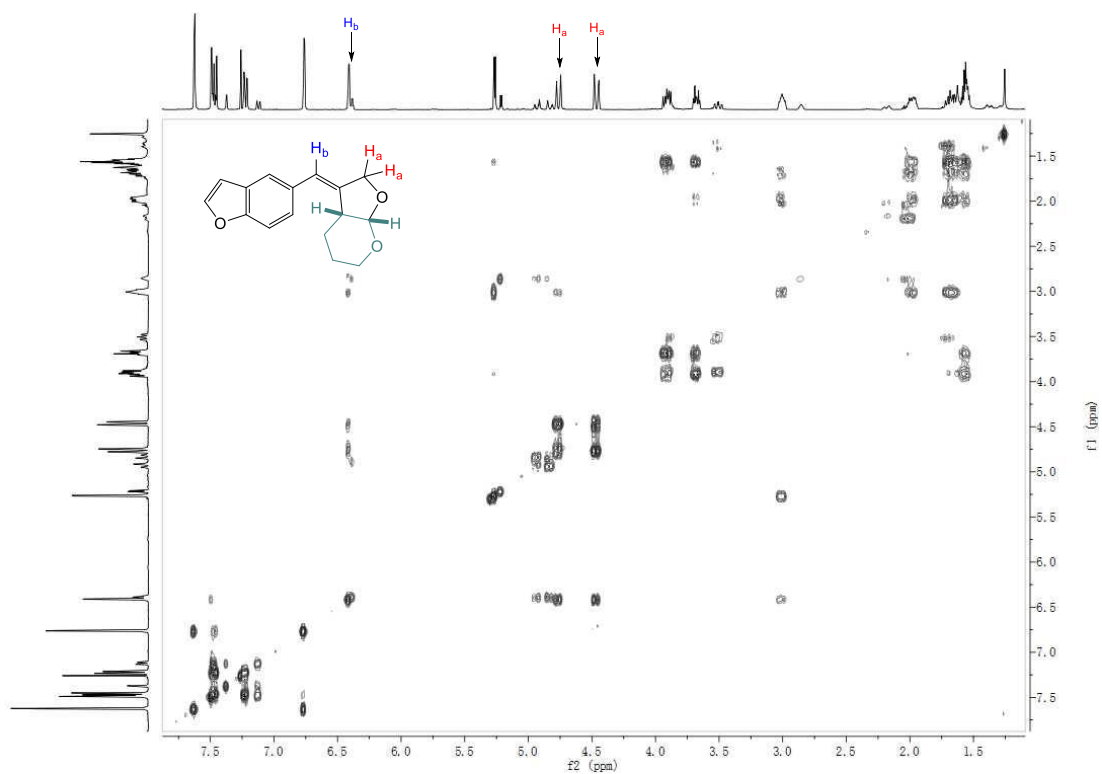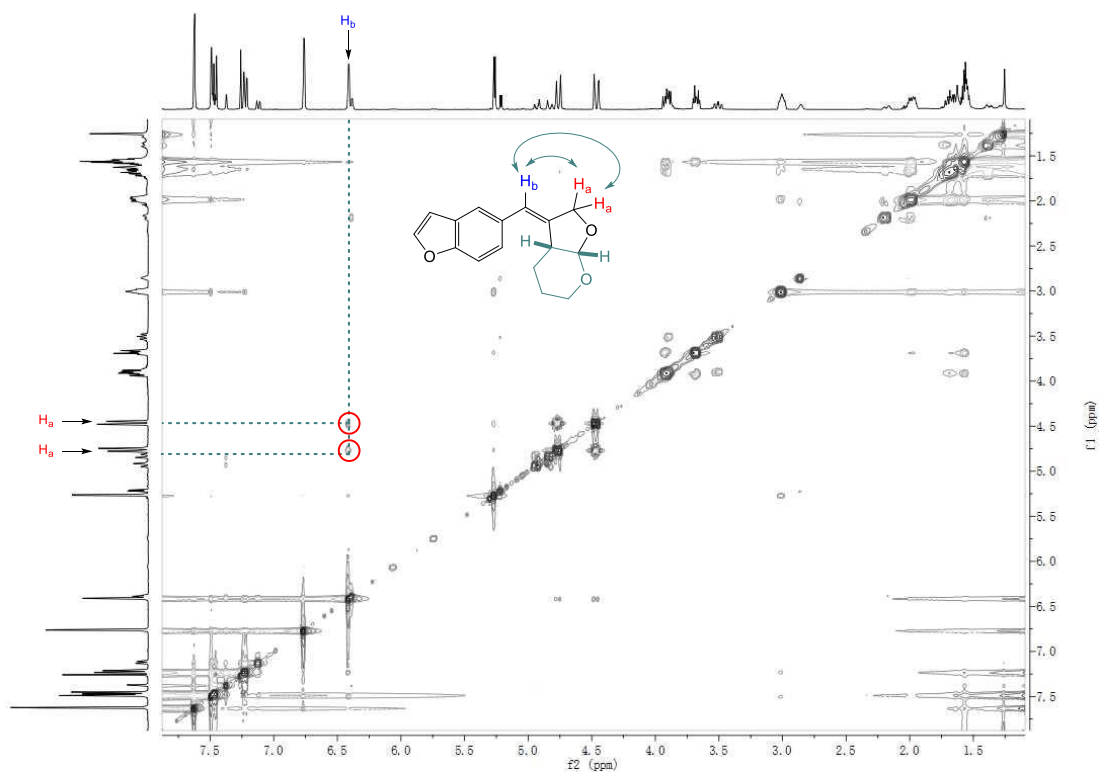

H<sup>1</sup>-H<sup>1</sup> COSY and H<sup>1</sup>-H<sup>1</sup> 2D-NOESY NMR spectra of compound **34**

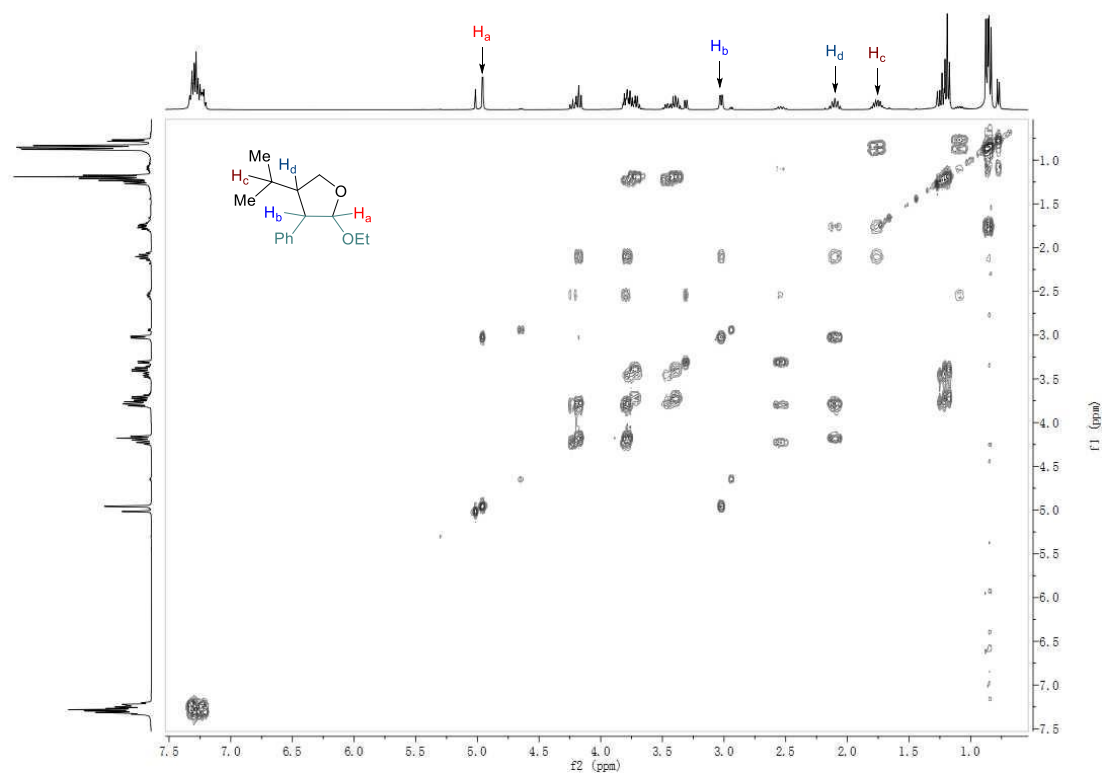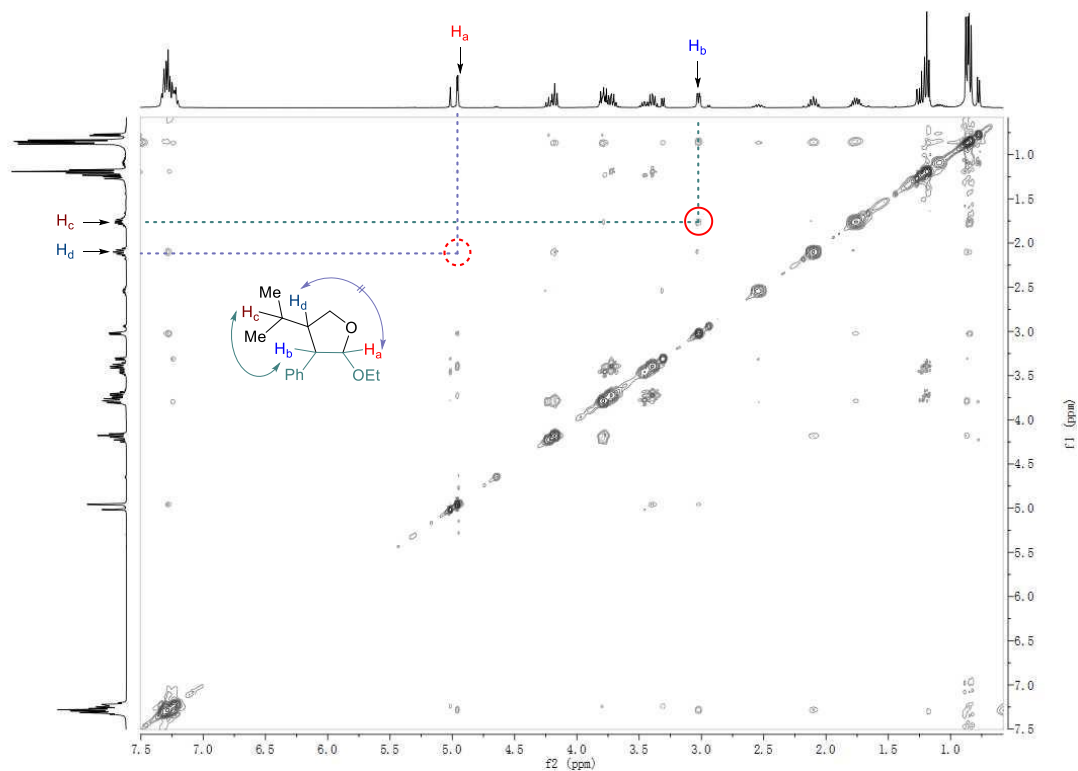

# H<sup>1</sup>-H<sup>1</sup> COSY and H<sup>1</sup>-H<sup>1</sup> 2D-NOESY NMR spectra of compound **35**

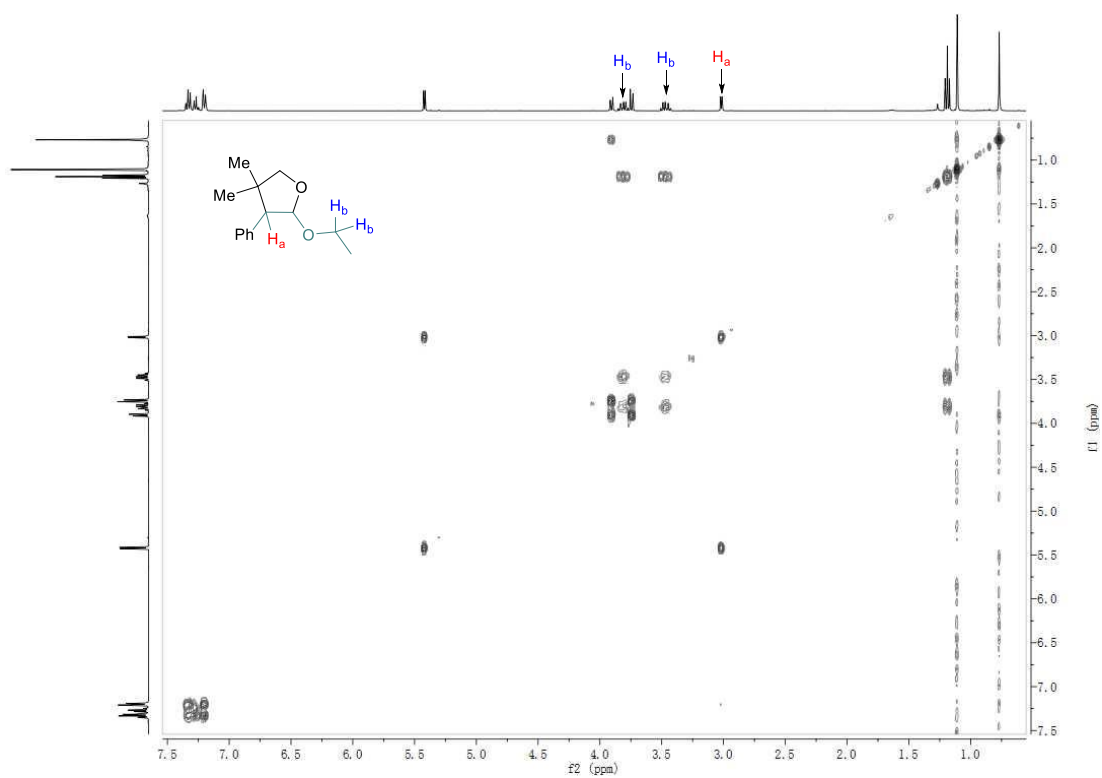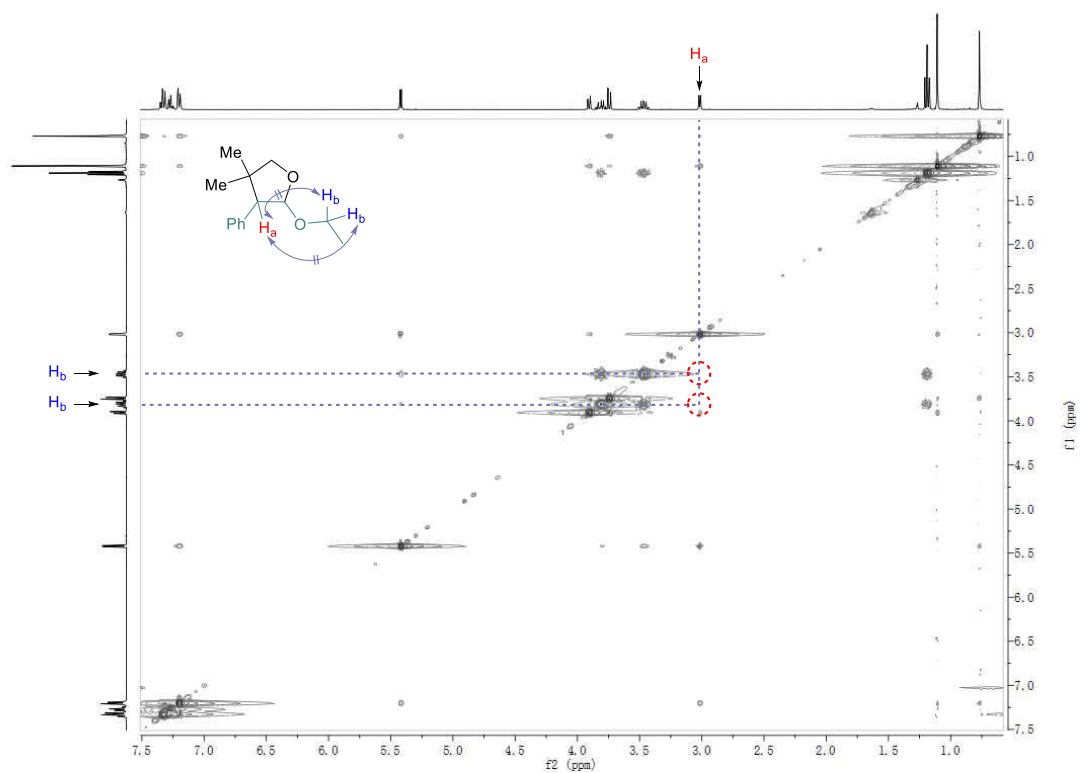

### III. Date S2: Stability of cyclic acetals in simulated GI fluids (Related to Table 2)

Instruments and Equipments:

Agilent 1260 HPLC with DAD and 6420 Triple Quad MS  
 Waters Xbridge C8 (4.6 mm× 150 mm × 3.5 μm) column  
 Waters CSH C18 (4.6 mm× 150 mm × 3.5 μm) column  
 Eppendorf ThermoMixer C  
 Eppendorf Multipette Xstream  
 Mettler Toledo Seven Excellence pH meter

Reagents and Materials:

Purified water, Milli-Q HPLC grade  
 Acetonitrile, Sigma-Aldrich HPLC grade  
 Ammonium Bicarbonate, Sigma-Aldrich  
 Simulated Gastric Fluid USP without enzymes (SGF, pH 1.2)  
 Simulated Intestinal Fluid USP without enzymes (SIF, pH 6.8)  
 Compounds **1, 15, 27, 35**.

Experiment:

HPLC method

|                    |                                                                                                                                              |    |    |
|--------------------|----------------------------------------------------------------------------------------------------------------------------------------------|----|----|
| Instrument         | Agilent 1260 HPLC with DAD and 6420 Triple Quad MS                                                                                           |    |    |
| Column             | Waters Xbridge C8 (4.6 mm× 150 mm × 3.5 μm) column for Compound A, B, C, E<br>Waters CSH C18 (4.6 mm× 150 mm × 3.5 μm) column for Compound D |    |    |
| Column temperature | 40 °C                                                                                                                                        |    |    |
| Mobile phase       | A: 10 mM NH <sub>4</sub> HCO <sub>3</sub> in water<br>B: ACN                                                                                 |    |    |
| Gradient program   | Time (min)                                                                                                                                   | A% | B% |
|                    | 0.00                                                                                                                                         | 95 | 5  |
|                    | 15.00                                                                                                                                        | 5  | 95 |
|                    | 20.00                                                                                                                                        | 5  | 95 |
|                    | 20.10                                                                                                                                        | 95 | 5  |
|                    | 25.00                                                                                                                                        | 95 | 5  |
| Flow rate          | 0.7 mL/min                                                                                                                                   |    |    |
| Detector           | UV 214nm for Compound A, B, C, D<br>UV 224nm for Compound E                                                                                  |    |    |
| Injection volume   | 10 μL                                                                                                                                        |    |    |

The solution stability of four compounds were evaluated in SGF and SIF at 37 °C. Detailed information is shown in Table S1.

**Table S1** Stability testing plan, related to **Table 2**

| Conditions | Time point | Test media | Testing items                            |
|------------|------------|------------|------------------------------------------|
| 37 °C      | 1 hr       | SGF        | Final pH,<br>% Purity,<br>% Degradation. |
|            | 3 hr       | SIF        |                                          |

## Testing media:

Simulated Gastric Fluid USP without enzymes (SGF, pH 1.2)

Simulated Intestinal Fluid USP without enzymes (SIF, pH 6.8)

## Initial solution:

Compound **35** was dissolved in ACN to make 2.5 mg/mL stock solutions. The solutions were diluted with ACN:water 1:1 to get 0.25 mg/mL initial solutions.

Compound **15** was dissolved in ACN to make a 5 mg/mL stock solution. The solution was diluted with ACN:water 1:1 to get 0.5 mg/mL initial solution.

Compounds **1** and **27** were dissolved in ACN and methanol to make a 2.5 mg/mL stock solution. The solution was diluted with ACN:water 1:1 to get 0.25 mg/mL initial solutions.

## Sample solution:

100 µL of each stock solutions were diluted with 900 µL of SGF and 900 µL of SIF.

## Testing procedure:

All the sample solutions were placed in Thermomixer according to Table S1 conditions respectively. The final pH values were measured by pH meter. The purities and concentrations were determined by HPLC-MS. Significant degradation (> 5 percent) of a compound in this study could suggest potential instability.

**Table S2** Degradation studies in SIF and SGF at 37 °C (According to FDA: Waiver of In Vivo Bioavailability and Bioequivalence Studies), related to **Table 2**

| Classification | Degradation (%) after 1 h at 37 °C in SGF | Degradation (%) after 3 h at 37 °C in SIF |
|----------------|-------------------------------------------|-------------------------------------------|
| Fairly stable  | < 5%                                      | < 5%                                      |
| Unstable       | > 5%                                      | > 5%                                      |

## Results:

The stability results of five intermediates and final pH values are listed in **Table S3 – S6** with stability classification remarks.

**Table S3** Stability results of compound **35** ( $\lambda = 214$  nm), related to **Table 2**

| Condition | Test Media | Time | Purity (%) | Conc. (mg/mL) | Recovery (%) | Degradation (%) | Classification | Final pH |
|-----------|------------|------|------------|---------------|--------------|-----------------|----------------|----------|
| Initial   | ACN:water  | 0    | 95.74      | 0.25          |              |                 |                |          |

|       |     |      |       |        |       |         |          |      |
|-------|-----|------|-------|--------|-------|---------|----------|------|
| 37 °C | SGF | 1hr  | 0.56  | 0.0015 | 0.60  | 99.4151 | Unstable | 1.06 |
|       | SIF | 3hrs | 98.22 | 0.2381 | 95.23 | -2.5903 | /        | 6.92 |

**Table S4** Stability results of compound **15** ( $\lambda = 214$  nm), related to **Table 2**

| Condition | Test Media | Time | Purity (%) | Conc. (mg/mL) | Recovery (%) | Degradation (%) | Classification | Final pH |
|-----------|------------|------|------------|---------------|--------------|-----------------|----------------|----------|
| Initial   | ACN:water  | 0    | 93.70      | 0.5000        |              |                 |                |          |
| 37 °C     | SGF        | 1hr  | 89.58      | 0.4585        | 91.71        | 4.3970          | Fairly stable  | 1.08     |
|           | SIF        | 3hrs | 93.61      | 0.4848        | 96.97        | 0.0961          | Fairly stable  | 6.89     |

**Table S5** Stability results of compound **1** ( $\lambda = 214$  nm), related to **Table 2**

| Condition | Test Media | Time | Purity (%) | Conc. (mg/mL) | Recovery (%) | Degradation (%) | Classification | Final pH |
|-----------|------------|------|------------|---------------|--------------|-----------------|----------------|----------|
| Initial   | ACN:water  | 0    | 92.05      | 0.2500        |              |                 |                |          |
| 37 °C     | SGF        | 1hr  | 80.65      | 0.2311        | 92.44        | 12.3846         | Unstable       | 1.09     |
|           | SIF        | 3hrs | 91.95      | 0.2618        | 104.73       | 0.1086          | Fairly stable  | 6.88     |

**Table S6** Stability results of compound **27** ( $\lambda = 224$  nm), related to **Table 2**

| Condition | Test Media | Time | Purity (%) | Conc. (mg/mL) | Recovery (%) | Degradation (%) | Classification | Final pH |
|-----------|------------|------|------------|---------------|--------------|-----------------|----------------|----------|
| Initial   | ACN:water  | 0    | 99.78      | 0.2500        |              |                 |                |          |
| 37 °C     | SGF        | 1hr  | 98.45      | 0.2598        | 103.90       | 1.3329          | Fairly stable  | 1.07     |
|           | SIF        | 3hrs | 99.27      | 0.2663        | 106.54       | 0.5111          | Fairly stable  | 6.87     |

#### IV. Reference

- Balmond, E. I., Benito-Alifonso, D., Coe, D. M., Alder, R. W., McGarrigle, E. M. and Galan, M. C. (2014). A 3,4-trans-fused cyclic protecting group facilitates  $\alpha$ -selective catalytic synthesis of 2-deoxyglycosides. *Angew. Chem. Int. Ed.* **53**, 8190-8194.
- Duan, Z. C., Hu, X. P., Zhang, C., Wang, D. Y., Yu, S. B. and Zheng, Z. (2009). Highly enantioselective rh-catalyzed hydrogenation of beta,gamma-unsaturated phosphonates with chiral ferrocene-based monophosphoramidite ligands. *J. Org. Chem.* **74**, 9191-9194.
- Fukuzumi, S., Kotani, H., Ohkubo, K., Ogo, S., Tkachenko, N. V. and Lemmetyinen, H. (2004). Electron-transfer state of 9-mesityl-10-methylacridinium ion with a much longer lifetime and higher energy than that of the natural photosynthetic reaction center. *J. Am. Chem. Soc.* **126**, 1600-1601.
- Liu, P. N., Su, F. H., Wen, T. B., Sung, H. H. Y., Williams, I. D. and Jia, G. C. (2010). Selective and efficient cycloisomerization of alkynols catalyzed by a new ruthenium complex with a tetradentate nitrogen-phosphorus mixed ligand. *Chem. Eur. J.* **16**, 7889-7897.
- Yan, C. S., Peng, Y., Xu, X. B. and Wang, Y. W. (2012). Nickel-mediated inter- and intramolecular reductive cross-coupling of unactivated alkyl bromides and aryl iodides at room temperature. *Chem. Eur. J.* **18**, 6039-6048.
